# Supplementary material for: Antagonistic cell surface and intracellular auxin signalling regulate plasma membrane H+-fluxes for root growth
Source: Research Square preprint supplement (doi:10.21203/rs.3.rs-266395/v2), 2021-09-02
Supplement: Supplementary file 1 [file a1186f94e6659ded4d498a71.xlsx]

## Sheet: Table3
	Extended Data Table 3. Overview of the IP-MS results for 35S::TMK1-GFP
		Tab1 - Analysed Results shows an overview of the putative interactors after MaxQuant and Perseus statistical analysis. The list is sorted based on the RATIO of 35S::TMK1-GFP vs Col-0 Wt control. P-values are calculated based on the three replicates of 35S::TMK1-GFP vs Col-0 Wt control using a two-sided t-test. Yellow highlight indicates bait, green indicates GFP and orange indicates selected prot…
		Tab2 - Peptide IDs shows the peptide IDs and their corresponding sequences from the MS/MS analysis. The peptide IDs can be found in the column “Peptide IDs” in Tab1.
		Tab3 - Coverage of identified proteins gives an overview of the peptide coverage and peptide sequences of the selected proteins in this manuscript.

## Sheet: Analysed results
WT	WT	WT	TMK1	TMK1	TMK1	Average WT	Average TMK1	Ratio	P-value	Peptides	Score	Intensity	-Log Student's T-test p-value WT_TMK1	Student's T-test q-value WT_TMK1	Student's T-test Difference WT_TMK1	Student's T-test Test statistic WT_TMK1	Uniprot	Fasta.headers	id	Peptide.IDs	Stickiness	In...IPs	Average.ratio	AGI	Protein.IDs	Majority.protein.IDs
4.51	5.02527	4.51	7.56529	7.61383	7.81728	4.68175	7.66547	963.193	9.2705e-05	8	60.319	154040000	4.0329	0	-2.98371	-2.5109	P43298	Symbols: TMK1 | transmembrane kinase 1 | chr1:24631503-24634415 FORWARD LENGTH=942	54	204;402;479;533;534;586;626;682	0.74%	1	1516.24	AT1G66150	AT1G66150.1;AT1G24650.1	AT1G66150.1
7.76066	4.51	4.51	6.82117	6.74307	7.37409	5.59355	6.97944	24.3157	0.276801	1	6.1465	92897000	0.557833	0.22075	-1.38589	-0.659442	Q9FFI4	Symbols: | Protein prenylyltransferase superfamily protein | chr5:5679995-5685597 FORWARD LENGTH=899	178	294	2.22%	3	18.1949	AT5G17270	AT5G17270.1	AT5G17270.1
4.51	4.51	4.51	5.61273	5.63488	6.29791	4.51	5.84851	21.8026	0.0039926	1	5.7764	2685800	2.39874	0.203	-1.33851	-1.09284	Q9SGY1	Symbols: PGP10 | P-glycoprotein 10 | chr1:3538470-3543782 REVERSE LENGTH=1227;Symbols: PGP3, MDR3 | P-glycoprotein 3 | chr4:780734-785329 REVERSE LENGTH=1229;Symbols: PGP9 | P-glycoprotein 9 | chr4:10022205-10027280 FORWARD LENGTH=1236;Symbols: PGP7 |	2	614	3.70%	5	63.8575	AT1G10680	AT1G10680.1;AT4G01820.1;AT4G18050.1;AT5G46540.1;AT3G28860.1;AT4G25960.1;AT1G02530.1;AT2G47000.1;AT3G62150.1	AT1G10680.1;AT4G01820.1;AT4G18050.1;AT5G46540.1;AT3G28860.1;AT4G25960.1;AT1G02530.1;AT2G47000.1;AT3G62150.1
4.89143	4.51	4.51	5.12685	6.09479	6.19659	4.63714	5.80607	14.7547	0.0324985	2	6.6308	3078100	1.48814	0.1595	-1.16893	-0.8571	Q9FF53	Symbols: PIP2F, PIP2;4 | plasma membrane intrinsic protein 2;4 | chr5:24375673-24376939 REVERSE LENGTH=291;Symbols: PIP3B, PIP2;8 | plasma membrane intrinsic protein 2;8 | chr2:7301647-7303180 FORWARD LENGTH=278;Symbols: PIP3 | plasma membrane intrinsic	200	17;499	8.15%	11	25.7948	AT5G60660	AT5G60660.1;AT2G16850.1;AT4G35100.2;AT4G35100.1	AT5G60660.1;AT2G16850.1;AT4G35100.2;AT4G35100.1
6.00612	5.99397	6.02206	7.20847	7.04305	7.06442	6.00738	7.10531	12.5293	3.10794e-05	5	30.311	46470000	4.50753	0.212	-1.09793	-1.04308	P20649	Symbols: AHA1, PMA, OST2, HA1 | H(+)-ATPase 1 | chr2:8221858-8227268 FORWARD LENGTH=949;Symbols: AHA2, PMA2, HA2 | H(+)-ATPase 2 | chr4:14770820-14775920 REVERSE LENGTH=948;Symbols: HA2 | H(+)-ATPase 2 | chr4:14770820-14775920 REVERSE LENGTH=981	74	148;165;237;389;407	34.07%	46	26.6093	AT2G18960	AT2G18960.1;AT4G30190.1;AT4G30190.2;AT1G80660.2;AT2G07560.1;AT1G80660.1;AT5G62670.1;AT3G47950.1;AT2G24520.1;AT1G17260.1;AT3G42640.1;AT5G57350.2;AT5G57350.1	AT2G18960.1;AT4G30190.1;AT4G30190.2
6.16542	4.51	4.51	6.06269	6.01912	6.22709	5.06181	6.10297	10.9941	0.134129	1	6.5397	5669100	0.872477	0.228	-1.04116	-0.669371	NA	ALDOA_RABIT | Fructose-bisphosphate aldolase A (EC 4.1.2.13) (Muscle-type aldolase)	205	241	NA	NA	NA	P00883	P00883	P00883
5.99292	5.66653	5.8645	6.7314	6.81654	7.06759	5.84132	6.87185	10.7282	0.00174466	1	6.6426	28091000	2.75829	0.164571	-1.03053	-0.905125	F4JHB6	Symbols: TMP-C, PIP1;4, PIP1E | plasma membrane intrinsic protein 1;4 | chr4:186569-187531 REVERSE LENGTH=219;Symbols: PIP1B, TMP-A, ATHH2, PIP1;2 | plasma membrane intrinsic protein 1B | chr2:18910450-18911579 FORWARD LENGTH=274;Symbols: PIP1A, ATPIP1,	0	401	28.15%	38	62.0377	AT4G00430	AT4G00430.2;AT2G45960.2;AT3G61430.2;AT3G61430.1;AT2G45960.1;AT1G01620.1;AT4G00430.1;AT2G45960.3	AT4G00430.2;AT2G45960.2;AT3G61430.2;AT3G61430.1;AT2G45960.1;AT1G01620.1;AT4G00430.1;AT2G45960.3
5.47865	5.4634	5.19229	5.65328	6.51807	6.45096	5.37811	6.20743	6.75026	0.0472843	3	12.06	8654100	1.32528	0.226353	-0.829321	-0.641435	P43287	Symbols: PIP2B, PIP2;2 | plasma membrane intrinsic protein 2 | chr2:15613624-15614791 REVERSE LENGTH=285	89	16;31;498	18.52%	25	30.1382	AT2G37170	AT2G37170.1	AT2G37170.1
6.85611	6.97824	6.89615	7.55732	7.72662	7.73652	6.91017	7.67349	5.79855	0.00036634	10	67.2	200260000	3.43612	0.207143	-0.763319	-0.714472	Q9FGC5	Symbols: | Mannose-binding lectin superfamily protein | chr5:14090825-14092808 FORWARD LENGTH=444	190	24;25;38;170;250;553;554;591;601;679	15.56%	21	4.05131	AT5G35940	AT5G35940.1	AT5G35940.1
5.34844	5.71099	4.51	5.74643	6.09933	5.98969	5.18981	5.94515	5.69301	0.111193	1	13.005	4849500	0.953921	0.2405	-0.755342	-0.551093	Q9FMP0	Symbols: MED19A | MED19A;BEST Arabidopsis thaliana protein match is: unknown protein (TAIR:AT5G19480.2);Has 1807 Blast hits to 1807 proteins in 277 species: Archae - 0;Bacteria - 0;Metazoa - 736;Fungi - 347;Plants - 385;Viruses - 0;Other Eukaryote	173	348	45.19%	61	3.99648	AT5G12230	AT5G12230.1	AT5G12230.1
4.51	6.1482	6.14746	6.30903	6.29962	6.45858	5.60189	6.35574	5.67356	0.241199	3	17.514	12752000	0.617625	0.321429	-0.753855	-0.486872	NA	Symbols: | Translation protein SH3-like family protein | chr1:3136407-3137430 REVERSE LENGTH=164;Symbols: | Translation protein SH3-like family protein | chr1:3106549-3107606 FORWARD LENGTH=164;Symbols: | Translation protein SH3-like family protein |	13	47;636;638	NA	NA	NA	AT1G09690	AT1G09690.1;AT1G09590.1;AT1G57860.1;AT1G57660.1	AT1G09690.1;AT1G09590.1;AT1G57860.1;AT1G57660.1
5.62249	6.19156	5.75663	5.47664	6.87579	7.42872	5.8569	6.59372	5.45534	0.290712	5	36.083	33503000	0.536537	0.31325	-0.736822	-0.458863	NA	LYSC_CHICK | Lysozyme C (EC 3.2.1.17) (1,4-beta-N-acetylmuramidase C) (Allergen Gal d IV) (allergen Gal d 4)	203	79;80;197;271;442	NA	NA	NA	P00698	P00698	P00698
4.51	6.04489	6.08916	6.15372	6.34349	6.29743	5.54802	6.26488	5.2103	0.241834	2	14.821	12695000	0.616483	0.3148	-0.716863	-0.470907	P51414	Symbols: | Translation protein SH3-like family protein | chr3:18504311-18504751 FORWARD LENGTH=146	139	90;312	48.89%	66	18.9897	AT3G49910	AT3G49910.1	AT3G49910.1
4.51	6.31792	6.24147	6.33884	6.27407	6.4712	5.6898	6.36137	4.69431	0.32082	3	18.315	16441000	0.493739	0.387027	-0.671572	-0.421536	A8MRX2	Symbols: | Ribosomal protein S5 domain 2-like superfamily protein | chr5:6090128-6090693 REVERSE LENGTH=139;Symbols: | Ribosomal protein S5 domain 2-like superfamily protein | chr5:6090128-6090693 REVERSE LENGTH=144;Symbols: | Ribosomal protein S5 do	69	156;190;563	60.00%	81	20.2014	AT5G18380	AT5G18380.3;AT5G18380.2;AT5G18380.1;AT2G09990.1	AT5G18380.3;AT5G18380.2;AT5G18380.1;AT2G09990.1
4.51	5.02706	5.12057	5.24403	5.9158	5.32154	4.88588	5.49379	4.05422	0.0996457	3	17.699	1880300	1.00154	0.325655	-0.607908	-0.473178	P43286	Symbols: PIP2A, PIP2, PIP2;1 | plasma membrane intrinsic protein 2A | chr3:19803906-19805454 REVERSE LENGTH=287;Symbols: PIP2A, PIP2, PIP2;1 | plasma membrane intrinsic protein 2A | chr3:19803906-19805454 REVERSE LENGTH=287	144	17;129;498	17.04%	23	115.108	AT3G53420	AT3G53420.2;AT3G53420.1	AT3G53420.2;AT3G53420.1
7.5262	6.83124	7.37523	8.27305	7.57979	7.59759	7.24422	7.81681	3.73756	0.139234	6	39.049	361080000	0.856254	0.340235	-0.572588	-0.43682	NA	GFP_AEQVI | Green fluorescent protein;eGFP from pK7WGF2;eGFP from pK7FWG2;GFPL1_ZOASP | GFP-like fluorescent chromoprotein FP506 (zFP506);Î©leader-YFP-3C2-TEV2-SBP;eGFP-3C2-TEV2-eGFP;SBP-3C2-TEV2-eGFP;SBP-3C2-TEV2-citrineYFP	225	141;195;199;218;482;579	NA	NA	NA	P42212;PS	P42212;PSB_N_GFP;PSB_C_GFP;Q9U6Y5;PSB_N_GS_yellow;PSB_N_GS_green;PSB_C_GS_green;PSB_C_GS_yellow	P42212;PSB_N_GFP;PSB_C_GFP;Q9U6Y5;PSB_N_GS_yellow;PSB_N_GS_green;PSB_C_GS_green;PSB_C_GS_yellow
4.51	4.51	4.51	6.0774	4.51	4.51	4.51	5.03247	3.33018	0.373901	8	6.0252	1648900	0.427243	0.597034	-0.522468	-0.343172	P22954	Symbols: | Heat shock protein 70 (Hsp 70) family protein | chr5:550296-552565 REVERSE LENGTH=653;Symbols: HSP70, ATHSP70 | heat shock protein 70 | chr3:3991487-3993689 REVERSE LENGTH=650;Symbols: ERD2, HSP70T-1 | heat shock protein 70 (Hsp 70) family p	165	63;82;301;302;386;415;612;637	41.48%	56	1391.64	AT5G02490	AT5G02490.1;AT3G12580.1;AT1G56410.1;AT1G16030.1	AT5G02490.1;AT3G12580.1;AT1G56410.1
6.28939	7.03439	7.06677	7.01749	7.52538	7.30367	6.79685	7.28218	3.05726	0.173426	3	17.679	124700000	0.760886	0.52751	-0.485332	-0.37524	Q8GWY0	Symbols: | unknown protein;Has 30201 Blast hits to 17322 proteins in 780 species: Archae - 12;Bacteria - 1396;Metazoa - 17338;Fungi - 3422;Plants - 5037;Viruses - 0;Other Eukaryotes - 2996 (source: NCBI BLink). | chr1:29794404-29795711 FORWARD LEN	63	562;623;716	46.67%	63	20.0221	AT1G79200	AT1G79200.1	AT1G79200.1
6.50297	6.53835	6.23307	6.6115	6.75537	6.94	6.4248	6.76896	2.20881	0.0638565	2	12.018	33158000	1.19479	0.6796	-0.344159	-0.303118	Q9SZX9	Symbols: | Ribosomal protein L6 family | chr4:6463201-6464458 REVERSE LENGTH=194;Symbols: PGY2 | Ribosomal protein L6 family | chr1:12023360-12024502 FORWARD LENGTH=194;Symbols: | Ribosomal protein L6 family | chr1:12010986-12012223 FORWARD LENGTH=194	29	484;645	51.85%	70	33.1579	AT4G10450	AT4G10450.1;AT1G33140.1;AT1G33120.1	AT4G10450.1;AT1G33140.1;AT1G33120.1
6.66148	6.86388	6.58017	6.96849	7.16717	6.98674	6.70184	7.0408	2.18251	0.0325203	7	46.517	72884000	1.48785	0.688176	-0.338956	-0.306603	Q9C865	Symbols: | SH3 domain-containing protein | chr1:11256150-11258479 REVERSE LENGTH=439	28	45;189;248;374;531;592;695	32.59%	44	193.528	AT1G31440	AT1G31440.1	AT1G31440.1
6.53278	6.08536	6.60017	6.65831	7.12587	6.33181	6.4061	6.70533	1.99172	0.347578	6	44.269	38548000	0.458948	0.736966	-0.299227	-0.233513	NA	HORN_HUMAN | Hornerin	231	252;253;258;471;472;697	NA	NA	NA	Q86YZ3	Q86YZ3	Q86YZ3
7.24524	7.16495	7.19016	7.5136	7.37965	7.58947	7.20012	7.49424	1.96845	0.0110521	9	57.329	180860000	1.95656	0.698564	-0.294124	-0.275975	F4HQT1	Symbols: GAPC-2, GAPC2 | glyceraldehyde-3-phosphate dehydrogenase C2 | chr1:4608465-4610494 REVERSE LENGTH=310;Symbols: GAPC-2, GAPC2 | glyceraldehyde-3-phosphate dehydrogenase C2 | chr1:4608465-4610494 REVERSE LENGTH=338;Symbols: GAPC, GAPC-1, GAPC1 |	15	2;3;4;30;285;393;437;541;669	57.04%	77	57.5095	AT1G13440	AT1G13440.2;AT1G13440.1;AT3G04120.1	AT1G13440.2;AT1G13440.1;AT3G04120.1
4.51	6.12707	5.38412	5.33427	6.2968	5.22845	5.3404	5.61984	1.90302	0.653947	1	7.7159	7093900	0.184458	0.81184	-0.279443	-0.177106	O04312	Symbols: ATMLP-300B, MEE36, MLP-300B | myrosinase-binding protein-like protein-300B | chr3:5586087-5587541 FORWARD LENGTH=300	120	673	12.59%	17	1.88061	AT3G16440	AT3G16440.1	AT3G16440.1
7.59282	7.70245	7.64648	7.9282	7.94034	7.89649	7.64725	7.92168	1.88116	0.00131491	3	21.057	548160000	2.88111	0.69758	-0.274427	-0.265341	P49693	Symbols: | Ribosomal protein L19e family protein | chr4:979391-980640 REVERSE LENGTH=208;Symbols: emb2386 | Ribosomal protein L19e family protein | chr1:608120-609391 REVERSE LENGTH=214	3	159;589;654	43.70%	59	5.73379	AT4G02230	AT4G02230.1;AT1G02780.1	AT4G02230.1;AT1G02780.1
6.82283	7.2183	7.18273	7.26167	7.24959	7.45886	7.07462	7.32337	1.77319	0.15776	7	48.94	151130000	0.802004	0.764	-0.248755	-0.217562	Q9LJV8	Symbols: | glycine-rich protein | chr3:11051645-11052629 REVERSE LENGTH=294	132	276;282;326;448;451;571;572	32.59%	44	3.67447	AT3G29075	AT3G29075.1;AT5G39570.1	AT3G29075.1
6.20415	6.16776	6.13229	6.18142	6.45332	6.56681	6.16807	6.40052	1.70785	0.116086	2	12.248	16435000	0.93522	0.747032	-0.232449	-0.208248	Q9C7E7	Symbols: | Pre-mRNA-splicing factor 3 | chr1:9779167-9782486 FORWARD LENGTH=786	27	149;200	28.89%	39	17.2134	AT1G28060	AT1G28060.1	AT1G28060.1
4.51	5.93574	5.60569	5.56751	5.64051	5.51274	5.35048	5.57359	1.6715	0.633153	1	7.0824	4298000	0.198491	0.806473	-0.223107	-0.155747	A8MR82	Symbols: | Surfeit locus protein 6 | chr5:1548398-1549534 FORWARD LENGTH=378;Symbols: | Surfeit locus protein 6 | chr5:1548198-1549534 FORWARD LENGTH=386	169	510	39.26%	53	219.045	AT5G05210	AT5G05210.2;AT5G05210.1	AT5G05210.2;AT5G05210.1
7.10728	7.38603	7.18227	7.20895	7.54136	7.51198	7.2252	7.42076	1.56879	0.221006	5	6.907	200320000	0.655596	0.804311	-0.195566	-0.172306	Q9M9W1	Symbols: | Ribosomal L22e protein family | chr3:1614641-1615204 FORWARD LENGTH=124;Symbols: | Ribosomal L22e protein family | chr3:1614641-1615204 FORWARD LENGTH=124;Symbols: | Ribosomal L22e protein family | chr3:1614641-1615204 FORWARD LENGTH=124	109	19;114;292;304;642	41.48%	56	9.42509	AT3G05560	AT3G05560.3;AT3G05560.2;AT3G05560.1	AT3G05560.3;AT3G05560.2;AT3G05560.1
6.78691	6.13609	6.582	6.64376	6.54289	6.89011	6.50166	6.69225	1.55092	0.43142	6	17.761	31931000	0.365099	0.815296	-0.19059	-0.156472	NA	ALBU_BOVIN | Serum albumin (BSA) (allergen Bos d 6)	213	78;139;400;617;661;706	NA	NA	NA	P02769	P02769	P02769
6.20333	6.04591	6.37822	6.46214	6.27307	6.45868	6.20915	6.39797	1.54459	0.174504	3	19.397	17048000	0.758195	0.805231	-0.188813	-0.169414	Q43292	Symbols: | Zinc-binding ribosomal protein family protein | chr1:19475213-19476152 REVERSE LENGTH=95	39	84;513;582	37.78%	51	8.45583	AT1G52300	AT1G52300.1	AT1G52300.1
6.69703	6.83088	6.86121	6.95642	6.97562	7.00552	6.79637	6.97919	1.5234	0.0251827	4	33.131	66445000	1.5989	0.807882	-0.182815	-0.173709	Q9LFE0	Symbols: DOT2, MDF | SART-1 family | chr5:5517784-5521566 REVERSE LENGTH=820	176	138;249;511;539	35.56%	48	8.64749	AT5G16780	AT5G16780.1	AT5G16780.1
6.46177	6.42784	6.27499	6.6322	6.41676	6.65398	6.3882	6.56765	1.51164	0.13202	2	11.771	25645000	0.879359	0.808792	-0.179448	-0.163874	Q9CAT7	Symbols: | Nascent polypeptide-associated complex NAC | chr1:27540506-27541364 REVERSE LENGTH=165;Symbols: BTF3, ATBTF3 | basic transcription factor 3 | chr1:6152572-6153425 REVERSE LENGTH=165	19	338;376	27.41%	37	8.84606	AT1G73230	AT1G73230.1;AT1G17880.1	AT1G73230.1;AT1G17880.1
5.4256	5.18264	5.29743	5.39113	5.4096	5.61368	5.30189	5.47147	1.47767	0.165312	1	5.6952	1903200	0.781697	0.805297	-0.169578	-0.154155	F4HU93	Symbols: APX1, MEE6, CS1, ATAPX1, ATAPX01 | ascorbate peroxidase 1 | chr1:2438005-2439349 FORWARD LENGTH=249;Symbols: APX1, MEE6, CS1, ATAPX1, ATAPX01 | ascorbate peroxidase 1 | chr1:2438005-2439435 FORWARD LENGTH=250;Symbols: APX1, MEE6, CS1, ATAPX1, A	10	103	17.04%	23	17.4745	AT1G07890	AT1G07890.6;AT1G07890.8;AT1G07890.7;AT1G07890.5;AT1G07890.4;AT1G07890.3;AT1G07890.2;AT1G07890.1;AT4G08390.4;AT4G08390.3;AT4G08390.2;AT4G08390.1	AT1G07890.6;AT1G07890.8;AT1G07890.7;AT1G07890.5;AT1G07890.4;AT1G07890.3;AT1G07890.2;AT1G07890.1;AT4G08390.4;AT4G08390.3;AT4G08390.2;AT4G08390.1
5.62611	5.85099	5.79175	5.93117	5.85113	5.99069	5.75628	5.92433	1.47247	0.0990278	2	12.453	6433400	1.00424	0.811853	-0.168046	-0.155813	F4IT48	Symbols: | Ribosomal protein L30/L7 family protein | chr2:18249227-18250402 REVERSE LENGTH=242;Symbols: | Ribosomal protein L30/L7 family protein | chr2:18249227-18250417 REVERSE LENGTH=247;Symbols: | Ribosomal protein L30/L7 family protein | chr2:13	99	181;426	52.59%	71	10.1982	AT2G44120	AT2G44120.1;AT2G44120.2;AT2G01250.1;AT3G13580.3;AT3G13580.2;AT3G13580.1	AT2G44120.1;AT2G44120.2;AT2G01250.1;AT3G13580.3;AT3G13580.2;AT3G13580.1
7.23335	7.13672	7.19967	7.373	7.39547	7.3017	7.18992	7.35672	1.46828	0.0140408	7	97.803	169960000	1.85261	0.810579	-0.166809	-0.160392	O04314	Symbols: PBP1 | PYK10-binding protein 1 | chr3:5579560-5580674 FORWARD LENGTH=298;Symbols: PBP1 | PYK10-binding protein 1 | chr3:5579560-5580674 FORWARD LENGTH=298;Symbols: PBP1, JAL30 | PYK10-binding protein 1 | chr3:5579560-5580674 FORWARD LENGTH=298	118	57;213;215;420;421;535;675	34.07%	46	5725.18	AT3G16420	AT3G16420.3;AT3G16420.2;AT3G16420.1	AT3G16420.3;AT3G16420.2;AT3G16420.1
6.1726	4.51	4.51	5.56899	4.51	5.60596	5.0642	5.22832	1.4592	0.816003	1	5.816	2294000	0.0883085	0.813096	-0.164115	-0.0988354	F4HZN9	Symbols: ATPDIL1-1, PDIL1-1 | PDI-like 1-1 | chr1:7645767-7648695 FORWARD LENGTH=487;Symbols: ATPDIL1-1, ATPDI5, PDI5, PDIL1-1 | PDI-like 1-1 | chr1:7645767-7648514 FORWARD LENGTH=501	21	223	25.19%	34	12.2986	AT1G21750	AT1G21750.2;AT1G21750.1	AT1G21750.2;AT1G21750.1
6.71593	6.62895	6.88367	6.94595	6.99459	6.77518	6.74285	6.90524	1.45342	0.179965	2	12.234	59717000	0.744812	0.804379	-0.16239	-0.147618	Q42064	Symbols: | Ribosomal protein L2 family | chr4:17097613-17098656 FORWARD LENGTH=258;Symbols: EMB2296 | Ribosomal protein L2 family | chr2:7837151-7838160 FORWARD LENGTH=258;Symbols: | Ribosomal protein L2 family | chr3:19016606-19017547 REVERSE LENGTH=	73	44;522	54.07%	73	11.5025	AT4G36130	AT4G36130.1;AT2G18020.1;AT3G51190.1	AT4G36130.1;AT2G18020.1;AT3G51190.1
6.65162	6.6162	6.6145	6.71495	6.65885	6.97907	6.62744	6.78429	1.435	0.189942	2	12.156	42892000	0.721379	0.7899	-0.156852	-0.142662	Q9FIF3	Symbols: | Ribosomal protein S8e family protein | chr5:23902626-23903670 REVERSE LENGTH=210;Symbols: | Ribosomal protein S8e family protein | chr5:6851695-6853012 REVERSE LENGTH=222	182	6;162	37.04%	50	21.0329	AT5G59240	AT5G59240.1;AT5G20290.1	AT5G59240.1;AT5G20290.1
7.19559	7.1328	7.17161	7.48014	7.12908	7.36124	7.16667	7.32348	1.43487	0.20854	7	58.04	174820000	0.680811	0.78519	-0.156814	-0.141952	Q38882	Symbols: PLDALPHA1, PLD | phospholipase D alpha 1 | chr3:5330835-5333474 FORWARD LENGTH=810	115	101;118;131;256;308;461;607	39.26%	53	84.8927	AT3G15730	AT3G15730.1;AT1G52570.1	AT3G15730.1
5.25967	5.38727	5.37403	5.38383	5.57255	5.50806	5.34032	5.48815	1.40548	0.097492	1	6.6342	2271600	1.01103	0.79239	-0.147825	-0.138333	Q8LPF0	Symbols: TAF2 | TBP-associated factor 2 | chr1:27805173-27814433 REVERSE LENGTH=1370;Symbols: TAF2 | TBP-associated factor 2 | chr1:27805173-27814433 REVERSE LENGTH=1390	59	324	28.15%	38	3.64831	AT1G73960	AT1G73960.2;AT1G73960.1	AT1G73960.2;AT1G73960.1
5.72717	5.68786	5.56107	5.96746	5.73332	5.71801	5.6587	5.80627	1.40465	0.195345	1	6.1524	4822100	0.709199	0.793516	-0.14757	-0.134765	Q39085	Symbols: DWF1 | cell elongation protein / DWARF1 / DIMINUTO (DIM) | chr3:6879835-6881616 REVERSE LENGTH=561;Symbols: DWF1, DIM, EVE1, DIM1, CBB1 | cell elongation protein / DWARF1 / DIMINUTO (DIM) | chr3:6879835-6881616 REVERSE LENGTH=561;Symbols: DWF1,	126	217	22.22%	30	5.00623	AT3G19820	AT3G19820.3;AT3G19820.2;AT3G19820.1	AT3G19820.3;AT3G19820.2;AT3G19820.1
6.60798	6.46258	6.75147	6.67208	6.62665	6.95648	6.60734	6.75173	1.39441	0.337691	1	6.502	40011000	0.471481	0.79938	-0.144391	-0.127476	NA	HVM49_MOUSE | Ig heavy chain V region VH558 B4;HVM10_MOUSE | Ig heavy chain V region 1-62-3 (Ig heavy chain V region 145);HVM50_MOUSE | Ig heavy chain V region AC38 15.3;HVM07_MOUSE | Ig heavy chain V region B1-8/186-2	206	518	NA	NA	NA	P06328;P0	P06328;P01754;P06329;P01751	P06328;P01754;P06329;P01751
7.23699	7.14448	7.26881	7.37658	7.34856	7.35717	7.21676	7.36077	1.39318	0.019605	4	29.062	165260000	1.70763	0.796033	-0.144008	-0.13871	Q9T043	Symbols: | Ribosomal protein L14 | chr4:13594104-13595187 REVERSE LENGTH=134	159	37;41;48;627	55.56%	75	4.54349	AT4G27090	AT4G27090.1;AT2G20450.1	AT4G27090.1
5.88695	6.61961	6.31936	6.28078	6.52684	6.41921	6.27531	6.40895	1.36031	0.583309	1	11.203	25036000	0.234101	0.801844	-0.133638	-0.109159	F4JQG2	Symbols: ATU2AF65A | U2 snRNP auxilliary factor, large subunit, splicing factor | chr4:17294591-17297609 REVERSE LENGTH=542;Symbols: ATU2AF65A | U2 snRNP auxilliary factor, large subunit, splicing factor | chr4:17294139-17297609 REVERSE LENGTH=551;Symbo	162	100	31.85%	43	12.2621	AT4G36690	AT4G36690.2;AT4G36690.4;AT4G36690.3;AT4G36690.1	AT4G36690.2;AT4G36690.4;AT4G36690.3;AT4G36690.1
6.35015	6.35089	6.39698	6.45573	6.45954	6.58271	6.36601	6.49933	1.35931	0.0400747	1	5.7354	23020000	1.39713	0.803813	-0.13332	-0.127641	F4IGQ3	Symbols: | Ubiquitin carboxyl-terminal hydrolase-related protein | chr2:11792996-11797343 REVERSE LENGTH=1106	80	387	0.74%	1	1.35931	AT2G27650	AT2G27650.1	AT2G27650.1
6.21149	6.25585	6.52719	6.36446	6.37299	6.65334	6.33151	6.46359	1.35544	0.3893	1	6.3361	21627000	0.409716	0.795735	-0.132081	-0.116176	P42036	Symbols: | Ribosomal protein S11 family protein | chr3:19503324-19504701 FORWARD LENGTH=150;Symbols: | Ribosomal protein S11 family protein | chr3:3623757-3624866 REVERSE LENGTH=150;Symbols: | Ribosomal protein S11 family protein | chr2:15169925-1517	86	596	64.44%	87	23.2623	AT3G52580	AT3G52580.1;AT3G11510.1;AT2G36160.1	AT3G52580.1;AT3G11510.1;AT2G36160.1
5.60735	5.85136	5.78187	5.81866	5.86661	5.93872	5.74686	5.87466	1.34216	0.187713	3	19.763	5930800	0.726506	0.79283	-0.127803	-0.118277	Q9LD90	Symbols: NAP57, AtNAP57, CBF5, AtCBF5 | homologue of NAP57 | chr3:21154255-21155952 REVERSE LENGTH=565	150	176;519;580	47.41%	64	2.5732	AT3G57150	AT3G57150.1	AT3G57150.1
6.81029	6.57956	6.32838	6.50649	6.9582	6.62192	6.57274	6.69554	1.32677	0.56157	4	25.178	40109000	0.250596	0.816587	-0.122794	-0.102824	Q9FJA6	Symbols: | Ribosomal protein S3 family protein | chr5:13710355-13712192 REVERSE LENGTH=248;Symbols: | Ribosomal protein S3 family protein | chr2:13450384-13451669 FORWARD LENGTH=250;Symbols: | Ribosomal protein S3 family protein | chr3:19951547-19952	84	160;184;212;599	61.48%	83	32.0712	AT5G35530	AT5G35530.1;AT2G31610.1;AT3G53870.1	AT5G35530.1;AT2G31610.1;AT3G53870.1
6.23686	6.18161	6.14208	6.23251	6.41012	6.2861	6.18685	6.30958	1.32655	0.107483	2	5.7685	14963000	0.968658	0.785652	-0.122725	-0.115849	Q9LUQ6	Symbols: | Ribosomal protein L19e family protein | chr3:5708982-5710249 FORWARD LENGTH=209	124	584;654	34.07%	46	5.89509	AT3G16780	AT3G16780.1	AT3G16780.1
6.14693	6.01465	6.46424	6.5048	6.25498	6.1891	6.20861	6.31629	1.28141	0.548298	1	5.6751	23418000	0.260984	0.809722	-0.107687	-0.0924794	F4HVG4	Symbols: BGLU46 | beta glucosidase 46 | chr1:22835452-22838444 FORWARD LENGTH=516	50	384	2.22%	3	2.19446	AT1G61820	AT1G61820.1	AT1G61820.1
6.86789	6.5717	6.73445	6.89309	6.64203	6.96161	6.72468	6.83224	1.28105	0.452901	4	33.449	49362000	0.343997	0.818865	-0.107565	-0.095232	P31167	Symbols: AAC1 | ADP/ATP carrier 1 | chr3:2605706-2607030 REVERSE LENGTH=381;Symbols: AAC1 | ADP/ATP carrier 1 | chr3:2605706-2607030 REVERSE LENGTH=381;Symbols: AAC3, ATAAC3 | ADP/ATP carrier 3 | chr4:14041486-14042781 REVERSE LENGTH=379;Symbols: AAC2	111	71;240;251;555	70.37%	95	83.8309	AT3G08580	AT3G08580.2;AT3G08580.1;AT4G28390.1;AT5G13490.2;AT5G13490.1	AT3G08580.2;AT3G08580.1;AT4G28390.1;AT5G13490.2;AT5G13490.1
6.93646	6.79281	6.81323	6.95073	6.8727	7.03802	6.8475	6.95382	1.27736	0.180003	2	12.317	66506000	0.744719	0.818069	-0.106314	-0.0997767	NA	Symbols: RPS18C | S18 ribosomal protein | chr4:6173818-6174963 FORWARD LENGTH=152;Symbols: | Ribosomal protein S13/S18 family | chr1:12370285-12371465 REVERSE LENGTH=152;Symbols: PFL, RPS18A, PFL1 | Ribosomal protein S13/S18 family | chr1:8067990-80691	22	378;655	NA	NA	NA	AT4G09800	AT4G09800.1;AT1G34030.1;AT1G22780.1	AT4G09800.1;AT1G34030.1;AT1G22780.1
6.45063	6.449	6.39127	6.59553	6.55763	6.45474	6.4303	6.53597	1.27545	0.0849108	1	11.232	26956000	1.07104	0.819333	-0.105663	-0.100981	Q9SIC8	Symbols: | unknown protein;Has 1719 Blast hits to 1091 proteins in 184 species: Archae - 5;Bacteria - 24;Metazoa - 559;Fungi - 169;Plants - 192;Viruses - 1;Other Eukaryotes - 769 (source: NCBI BLink). | chr2:13392220-13392819 REVERSE LENGTH=199	83	658	34.07%	46	20.102	AT2G31410	AT2G31410.1	AT2G31410.1
8.08372	8.38093	8.31067	8.27133	8.46504	8.34864	8.25844	8.36167	1.26832	0.384836	14	249.71	1870500000	0.414724	0.814213	-0.103228	-0.0933434	Q9C525	Symbols: BGLU21 | Glycosyl hydrolase superfamily protein | chr1:24700110-24702995 REVERSE LENGTH=522;Symbols: BGLU21 | Glycosyl hydrolase superfamily protein | chr1:24700110-24702995 REVERSE LENGTH=524	55	93;94;120;142;180;357;358;371;382;433;456;699;713;714	34.07%	46	271.069	AT1G66270	AT1G66270.2;AT1G66270.1	AT1G66270.2;AT1G66270.1
6.10724	4.51	4.51	5.21529	5.1261	5.08543	5.04241	5.14228	1.25852	0.860706	1	5.85	1814600	0.0651453	0.865571	-0.0998607	-0.065107	F4JBY2	Symbols: | Transketolase | chr3:22454004-22456824 FORWARD LENGTH=740;Symbols: | Transketolase | chr3:22454004-22456824 FORWARD LENGTH=741;Symbols: | Transketolase | chr2:18672737-18675589 FORWARD LENGTH=741	100	668	27.41%	37	10.0605	AT3G60750	AT3G60750.2;AT3G60750.1;AT2G45290.1	AT3G60750.2;AT3G60750.1;AT2G45290.1
6.96976	6.83459	7.0199	6.89326	7.09878	7.12418	6.94142	7.03874	1.25117	0.348364	4	25.357	78982000	0.457966	0.807584	-0.097318	-0.0891441	P38666	Symbols: STV1, RPL24B, RPL24 | Ribosomal protein L24e family protein | chr3:19660749-19661912 REVERSE LENGTH=163;Symbols: RPL24A | ribosomal protein L24 | chr2:15350548-15351819 REVERSE LENGTH=164	143	12;86;328;478	48.15%	65	74.5397	AT3G53020	AT3G53020.1;AT2G36620.1	AT3G53020.1;AT2G36620.1
6.37862	6.21561	6.13656	6.4307	6.11952	6.47009	6.2436	6.3401	1.24884	0.504631	10	65.178	16472000	0.297026	0.807694	-0.0965072	-0.0852686	F4KCE5	Symbols: HSC70-1, HSP70-1, AT-HSC70-1, HSC70 | heat shock cognate protein 70-1 | chr5:554055-556334 REVERSE LENGTH=651;Symbols: | Heat shock protein 70 (Hsp 70) family protein | chr3:2903434-2905632 REVERSE LENGTH=649;Symbols: | Heat shock protein 70	166	63;82;163;203;301;302;385;415;612;637	65.93%	89	29.8071	AT5G02500	AT5G02500.1;AT3G09440.2;AT3G09440.1;AT5G02500.2	AT5G02500.1;AT3G09440.2;AT3G09440.1;AT5G02500.2
9.97042	9.78912	9.78337	9.94076	9.85902	10.0223	9.84764	9.94069	1.23896	0.295642	3	33.721	63862000000	0.529234	0.811123	-0.0930589	-0.0863722	NA	TRYP_PIG | Trypsin (EC 3.4.21.4)	204	390;429;628	NA	NA	NA	P00761;P0	P00761;P00760;P07477	P00761
7.13494	7.05793	7.19734	7.20892	7.21168	7.24834	7.13007	7.22298	1.23855	0.0928538	5	33.211	125910000	1.0322	0.812863	-0.0929124	-0.0891442	P59233	Symbols: UBQ5 | ubiquitin 5 | chr3:23037138-23037611 FORWARD LENGTH=157;Symbols: UBQ6 | ubiquitin 6 | chr2:19344701-19345174 FORWARD LENGTH=157;Symbols: UBQ6 | ubiquitin 6 | chr2:19344701-19345174 FORWARD LENGTH=157;Symbols: | Ribosomal protein S27a /	101	81;171;296;346;585	57.04%	77	53.6562	AT3G62250	AT3G62250.1;AT2G47110.2;AT2G47110.1;AT1G23410.1;AT3G52590.1;AT2G36170.1;AT4G05050.4;AT2G35635.1;AT1G31340.1;AT4G05050.3;AT4G05050.2;AT4G05050.1;AT4G02890.2;AT4G02890.1;AT1G55060.1;AT4G05320.5;AT4G02890.4;AT4G02890.3;AT5G03240.3;AT5G03240.2;AT5G03240.1;AT1G65350.1;AT5G37640.1;AT4G05320.6;AT4G05320.3;AT4G05320.1;AT5G20620.1;AT4G05320.4;AT4G05320.2;AT3G09790.1	AT3G62250.1;AT2G47110.2;AT2G47110.1;AT1G23410.1;AT3G52590.1;AT2G36170.1;AT4G05050.4;AT2G35635.1;AT1G31340.1;AT4G05050.3;AT4G05050.2;AT4G05050.1;AT4G02890.2;AT4G02890.1;AT1G55060.1;AT4G05320.5;AT4G02890.4;AT4G02890.3;AT5G03240.3;AT5G03240.2;AT5G03240.1;AT1G65350.1;AT5G37640.1;AT4G05320.6;AT4G05320.3;AT4G05320.1;AT5G20620.1;AT4G05320.4;AT4G05320.2
6.49216	6.44784	6.45242	6.46564	6.53338	6.66302	6.46414	6.55401	1.22991	0.206008	3	35.946	30373000	0.686115	0.805266	-0.0898739	-0.0848194	Q9LYK9	Symbols: | Ribosomal protein S26e family protein | chr3:20892309-20893343 REVERSE LENGTH=130	148	238;427;447	47.41%	64	26.4408	AT3G56340	AT3G56340.1;AT2G40590.1;AT2G40510.1	AT3G56340.1
5.86902	5.91642	5.95812	5.92807	6.02788	6.05645	5.91452	6.00413	1.22918	0.12717	1	6.3012	7836700	0.895617	0.811692	-0.0896144	-0.0856196	Q94JX8	Symbols: | CONTAINS InterPro DOMAIN/s: Kinase phosphorylation domain (InterPro:IPR019315);Has 8882 Blast hits to 4920 proteins in 346 species: Archae - 10;Bacteria - 184;Metazoa - 3955;Fungi - 1221;Plants - 712;Viruses - 24;Other Eukaryotes - 2776	141	615	41.48%	56	451.992	AT3G52220	AT3G52220.1	AT3G52220.1
7.27566	7.21008	7.0199	7.14226	7.35809	7.26463	7.16855	7.25499	1.22024	0.431533	5	33.199	144490000	0.364986	0.816596	-0.0864469	-0.0786648	Q9FE58	Symbols: | Ribosomal L22e protein family | chr5:9836166-9837113 FORWARD LENGTH=124	187	18;114;292;304;642	37.78%	51	14.2919	AT5G27770	AT5G27770.1	AT5G27770.1
5.90219	5.94992	5.9505	5.96457	6.03503	6.06142	5.9342	6.02034	1.21938	0.0596002	4	25.078	8195200	1.22475	0.806214	-0.0861376	-0.0833827	A8MS03	Symbols: RPS6, RPS6A | ribosomal protein S6 | chr4:15346306-15347075 REVERSE LENGTH=188	160	49;315;323;625	54.81%	74	8.44304	AT4G31700	AT4G31700.2	AT4G31700.2
6.43688	6.47183	6.4882	6.52892	6.53101	6.58495	6.46564	6.54829	1.20964	0.0254461	1	6.0412	27787000	1.59438	0.81185	-0.0826551	-0.0807353	F4K5C7	Symbols: | Ribosomal protein S4 (RPS4A) family protein | chr5:2202783-2203805 FORWARD LENGTH=244;Symbols: | Ribosomal protein S4 (RPS4A) family protein | chr2:7546598-7548138 FORWARD LENGTH=261;Symbols: | Ribosomal protein S4 (RPS4A) family protein |	71	355	54.81%	74	7.66487	AT5G07090	AT5G07090.2;AT2G17360.1;AT5G58420.1;AT5G07090.1	AT5G07090.2;AT2G17360.1;AT5G58420.1;AT5G07090.1
6.60542	6.58819	6.75602	6.7205	6.6309	6.84559	6.64988	6.73233	1.20906	0.371343	3	17.504	41129000	0.430224	0.824642	-0.0824485	-0.076203	P59224	Symbols: ATRPS13A, RPS13, PFL2, RPS13A | ribosomal protein S13A | chr4:37172-38123 FORWARD LENGTH=151;Symbols: | Ribosomal protein S13/S15 | chr3:22460525-22461656 REVERSE LENGTH=151	152	119;360;613	57.78%	78	17.8532	AT4G00100	AT4G00100.1;AT3G60770.1	AT4G00100.1;AT3G60770.1
7.78252	7.93924	7.90178	7.88154	7.96641	8.0159	7.87452	7.95462	1.20255	0.262127	6	60.181	743230000	0.581489	0.82122	-0.0801034	-0.0754684	O81493	Symbols: | TRAF-like family protein | chr5:9200492-9202153 FORWARD LENGTH=351	185	164;207;280;332;703;704	19.26%	26	2.59239	AT5G26260	AT5G26260.1	AT5G26260.1
6.11374	5.87628	5.87872	6.05492	5.98219	6.05591	5.95625	6.03101	1.18785	0.415811	1	9.0447	8191800	0.381104	0.854424	-0.0747623	-0.0690678	Q9FNP8	Symbols: | Ribosomal protein S19e family protein | chr5:24611158-24612202 FORWARD LENGTH=143;Symbols: | Ribosomal protein S19e family protein | chr5:5037242-5038136 REVERSE LENGTH=143;Symbols: | Ribosomal protein S19e family protein | chr3:364138-365	105	108	40.00%	54	8.28799	AT5G61170	AT5G61170.1;AT5G15520.1;AT3G02080.1	AT5G61170.1;AT5G15520.1;AT3G02080.1
6.96217	7.33003	6.8751	7.09068	7.16167	7.13783	7.05577	7.13006	1.18657	0.626048	5	42.931	124010000	0.203392	0.870754	-0.0742939	-0.0651149	A8MR02	Symbols: | TRAF-like family protein | chr5:9208724-9210403 FORWARD LENGTH=350;Symbols: | TRAF-like family protein | chr5:9208724-9210403 FORWARD LENGTH=327	186	207;353;399;418;705	21.48%	29	3.14434	AT5G26280	AT5G26280.1;AT5G26280.2	AT5G26280.1;AT5G26280.2
6.3057	6.28614	6.46736	6.49734	6.43045	6.35313	6.35306	6.42697	1.18552	0.356366	4	23.997	20079000	0.448104	0.849904	-0.0739082	-0.0690118	O82772	Symbols: GLUC, BGLU25 | beta glucosidase 25 | chr3:881028-884028 FORWARD LENGTH=531	108	132;368;545;546	8.15%	11	2.02636	AT3G03640	AT3G03640.1	AT3G03640.1
6.25397	6.12672	6.20997	6.26766	6.33226	6.19173	6.19688	6.26388	1.16681	0.291223	3	22.331	15787000	0.535775	0.861435	-0.0669993	-0.0634974	Q9FE65	Symbols: RPL34 | ribosomal protein L34 | chr1:26189900-26191081 FORWARD LENGTH=119;Symbols: | Ribosomal protein L34e superfamily protein | chr1:9315640-9316681 REVERSE LENGTH=120	57	15;76;396	31.11%	42	7.62365	AT1G69620	AT1G69620.1;AT1G26880.1;AT1G26880.2;AT3G28900.1	AT1G69620.1;AT1G26880.1
6.86247	6.73921	6.98618	6.93547	6.8444	7.00074	6.86262	6.92687	1.15944	0.489345	2	18.239	66600000	0.310385	0.862045	-0.064249	-0.0592436	F4JUQ4	Symbols: | Zinc-binding ribosomal protein family protein | chr4:8242684-8243805 REVERSE LENGTH=105;Symbols: | Zinc-binding ribosomal protein family protein | chr3:8375427-8376224 FORWARD LENGTH=105;Symbols: | Zinc-binding ribosomal protein family pro	129	244;269	17.78%	24	4.29452	AT4G14320	AT4G14320.1;AT3G23390.1;AT4G14320.2	AT4G14320.1;AT3G23390.1;AT4G14320.2
6.90019	7.12336	7.05888	6.92872	7.09374	7.24346	7.02748	7.08864	1.15122	0.615599	4	26.041	105200000	0.210702	0.874966	-0.0611599	-0.0549747	P49201	Symbols: | Ribosomal protein S12/S23 family protein | chr5:693280-694396 REVERSE LENGTH=142;Symbols: | Ribosomal protein S12/S23 family protein | chr3:2969197-2970291 REVERSE LENGTH=142	168	235;316;322;512	55.56%	75	7.1932	AT5G02960	AT5G02960.1;AT3G09680.1	AT5G02960.1;AT3G09680.1
6.23757	6.57724	6.45853	6.26069	6.6665	6.52003	6.42445	6.4824	1.14277	0.727207	4	24.374	28368000	0.138342	0.884918	-0.0579584	-0.0501865	Q940B0	Symbols: | Ribosomal protein L18e/L15 superfamily protein | chr5:9873169-9874297 FORWARD LENGTH=187;Symbols: RPL18 | ribosomal protein L18 | chr3:1621511-1622775 FORWARD LENGTH=187	188	51;239;532;641	57.04%	77	9.20114	AT5G27850	AT5G27850.1;AT3G05590.1	AT5G27850.1;AT3G05590.1
8.49914	8.63091	8.50764	8.45615	8.65601	8.69346	8.54589	8.60187	1.13757	0.546496	14	218.38	3570200000	0.262413	0.882154	-0.0559788	-0.0515897	O80998	Symbols: | Mannose-binding lectin superfamily protein | chr2:11077718-11079642 REVERSE LENGTH=449	79	23;42;117;209;229;230;300;310;435;455;540;574;633;634	31.85%	43	131.043	AT2G25980	AT2G25980.1;AT1G52100.2;AT1G52100.1;AT5G35950.1	AT2G25980.1
6.08164	6.29931	6.46216	6.21859	6.51996	6.26252	6.28103	6.33369	1.1289	0.73464	2	22.008	19649000	0.133925	0.894032	-0.0526547	-0.0459922	F4JXC2	Symbols: | unknown protein;Has 30201 Blast hits to 17322 proteins in 780 species: Archae - 12;Bacteria - 1396;Metazoa - 17338;Fungi - 3422;Plants - 5037;Viruses - 0;Other Eukaryotes - 2996 (source: NCBI BLink). | chr5:21848180-21849935 FORWARD LEN	195	283;616	37.04%	50	11.4319	AT5G53800	AT5G53800.1	AT5G53800.1
6.40588	7.06416	6.77137	6.75319	6.76799	6.86485	6.74714	6.79535	1.1174	0.815622	2	20.511	65312000	0.0885113	0.908712	-0.048209	-0.0403893	A8MR49	Symbols: | Ribosomal protein L31e family protein | chr5:22944003-22944767 REVERSE LENGTH=85;Symbols: | Ribosomal protein L31e family protein | chr5:22944003-22944767 REVERSE LENGTH=119;Symbols: | Ribosomal protein L31e family protein | chr4:13286026-	198	188;314	41.48%	56	14.557	AT5G56710	AT5G56710.2;AT5G56710.1;AT4G26230.1;AT2G19740.1	AT5G56710.2;AT5G56710.1;AT4G26230.1;AT2G19740.1
5.94931	6.01246	5.8697	6.00056	5.96887	5.99477	5.94382	5.98807	1.10725	0.355974	1	5.7677	8472400	0.448582	0.904277	-0.0442468	-0.0424456	F4I472	Symbols: RPS15 | cytosolic ribosomal protein S15 | chr1:1141852-1142960 REVERSE LENGTH=151;Symbols: RPS15 | cytosolic ribosomal protein S15 | chr1:1141852-1142960 REVERSE LENGTH=152	5	137	49.63%	67	6.96441	AT1G04270	AT1G04270.2;AT1G04270.1	AT1G04270.2;AT1G04270.1
7.83476	8.0491	7.85766	7.7944	8.13033	7.94777	7.91384	7.9575	1.10575	0.731259	16	254.7	837230000	0.135929	0.906611	-0.0436581	-0.0390322	Q9C8Y9	Symbols: BGLU22 | Glycosyl hydrolase superfamily protein | chr1:24706759-24709737 REVERSE LENGTH=524	56	95;96;105;106;121;124;125;142;158;180;361;382;433;453;699;702	37.78%	51	17.9665	AT1G66280	AT1G66280.1;AT3G21370.1;AT1G47600.2;AT1G51470.1;AT1G47600.1	AT1G66280.1
6.1522	6.00458	6.16062	6.06134	6.18746	6.19061	6.1058	6.14647	1.09818	0.572069	1	7.0763	11314000	0.242552	0.905443	-0.0406737	-0.038149	Q9C9C6	Symbols: | Ribosomal protein L6 family protein | chr1:27850033-27851299 REVERSE LENGTH=233;Symbols: | Ribosomal protein L6 family protein | chr1:27847256-27848680 REVERSE LENGTH=233;Symbols: | Ribosomal protein L6 family protein | chr1:6377448-637854	20	659	54.07%	73	14.3599	AT1G74060	AT1G74060.1;AT1G74050.1;AT1G18540.1	AT1G74060.1;AT1G74050.1;AT1G18540.1
8.95605	9.06311	9.18563	9.12901	9.03715	9.16044	9.06826	9.10887	1.098	0.621208	6	291.98	10476000000	0.206763	0.901251	-0.0406036	-0.0377378	NA	IGKC_MOUSE | Ig kappa chain C region	207	123;275;467;502;606;681	NA	NA	NA	P01837	P01837	P01837
6.99151	6.80372	6.88783	7.00941	6.80551	6.9799	6.89435	6.93161	1.08956	0.67911	5	30.378	70773000	0.16806	0.908041	-0.0372523	-0.0343767	A8MQQ1	Symbols: ARP1, RPL3A, RP1 | ribosomal protein 1 | chr1:16267519-16268631 FORWARD LENGTH=306;Symbols: RP1 | ribosomal protein 1 | chr1:16266992-16268631 FORWARD LENGTH=389;Symbols: RP1 | ribosomal protein 1 | chr1:16266992-16268631 FORWARD LENGTH=389;Sy	32	202;243;264;470;647	62.22%	84	5.29405	AT1G43170	AT1G43170.4;AT1G43170.9;AT1G43170.8;AT1G43170.7;AT1G43170.6;AT1G43170.5;AT1G43170.3;AT1G43170.2;AT1G43170.1;AT1G61580.1	AT1G43170.4;AT1G43170.9;AT1G43170.8;AT1G43170.7;AT1G43170.6;AT1G43170.5;AT1G43170.3;AT1G43170.2;AT1G43170.1
7.36359	7.32025	7.22303	7.18789	7.46528	7.32754	7.30229	7.3269	1.05831	0.798507	5	42.421	184960000	0.0977214	0.938388	-0.0246123	-0.0225755	Q8RXU5	Symbols: | Zinc-binding ribosomal protein family protein | chr3:22268803-22269750 FORWARD LENGTH=92	151	74;311;321;404;694	49.63%	67	14.5475	AT3G60245	AT3G60245.1;AT3G10950.1	AT3G60245.1
6.14186	5.82341	5.864	5.88903	6.07573	5.93279	5.94309	5.96585	1.05381	0.852579	6	36.905	7425800	0.0692652	0.952772	-0.022761	-0.0204161	F4J8V9	Symbols: ACT2, DER1, LSR2, ENL2 | actin 2 | chr3:6475535-6476832 FORWARD LENGTH=377;Symbols: ACT8 | actin 8 | chr1:18216539-18217947 FORWARD LENGTH=377;Symbols: ACT2, DER1, LSR2, ENL2 | actin 2 | chr3:6475535-6476728 FORWARD LENGTH=371;Symbols: ACT11 |	36	13;20;89;111;157;265	49.63%	67	39.3211	AT3G18780	AT3G18780.2;AT1G49240.1;AT3G18780.1;AT3G12110.1;AT2G42100.1	AT3G18780.2;AT1G49240.1;AT3G18780.1;AT3G12110.1
6.42264	6.69848	6.74084	6.58681	6.68601	6.64788	6.62066	6.64023	1.04611	0.85965	6	47.527	40531000	0.0656785	0.955275	-0.0195793	-0.0177371	Q2V3X4	Symbols: | Ribosomal protein L4/L1 family | chr3:2953813-2955444 FORWARD LENGTH=406;Symbols: | Ribosomal protein L4/L1 family | chr3:2953813-2955444 FORWARD LENGTH=405	113	22;341;410;440;463;619	54.07%	73	5.03184	AT3G09630	AT3G09630.1;AT3G09630.2	AT3G09630.1;AT3G09630.2
7.32412	7.56205	7.34959	7.29028	7.31222	7.66924	7.41192	7.42391	1.028	0.937683	6	39.753	246270000	0.0279439	0.986415	-0.0119936	-0.0104826	Q8GTY0	Symbols: | GTP binding Elongation factor Tu family protein | chr5:24289226-24290577 FORWARD LENGTH=400;Symbols: | GTP binding Elongation factor Tu family protein | chr5:24289226-24290675 FORWARD LENGTH=449;Symbols: | GTP binding Elongation factor Tu	11	178;267;284;370;547;715	70.37%	95	13.553	AT5G60390	AT5G60390.2;AT5G60390.3;AT5G60390.1;AT1G07940.2;AT1G07940.1;AT1G07930.1;AT1G07920.1;AT1G07930.2	AT5G60390.2;AT5G60390.3;AT5G60390.1;AT1G07940.2;AT1G07940.1;AT1G07930.1;AT1G07920.1;AT1G07930.2
8.72418	8.82073	8.74442	8.72788	8.7706	8.82396	8.76311	8.77415	1.02574	0.798498	14	156.62	5277200000	0.0977259	0.991204	-0.0110372	-0.010608	O04310	Symbols: | Mannose-binding lectin superfamily protein | chr3:5593029-5595522 FORWARD LENGTH=705;Symbols: | Mannose-binding lectin superfamily protein | chr3:5593029-5595522 FORWARD LENGTH=705	122	152;198;210;211;309;329;391;423;504;542;552;561;608;678	23.70%	32	75.9518	AT3G16460	AT3G16460.2;AT3G16460.1	AT3G16460.2;AT3G16460.1
6.66126	6.62001	6.69631	6.70024	6.6224	6.68245	6.6592	6.66837	1.02134	0.790334	3	5.8942	88033000	0.102189	0.984804	-0.00917006	-0.00888346	Q9SE50	Symbols: BGL1, BGLU18, ATBG1 | beta glucosidase 18 | chr1:19515250-19517646 FORWARD LENGTH=461;Symbols: BGLU18 | beta glucosidase 18 | chr1:19515250-19517930 FORWARD LENGTH=528;Symbols: BGL1, BGLU18, ATBG1 | beta glucosidase 18 | chr1:19515250-19517930	40	109;142;699	29.63%	40	2.72282	AT1G52400	AT1G52400.2;AT1G52400.3;AT1G52400.1	AT1G52400.2;AT1G52400.3;AT1G52400.1
6.56858	6.46105	6.46937	6.59278	6.46002	6.46639	6.49966	6.5064	1.01563	0.908998	2	19.461	28733000	0.0414369	0.997524	-0.00673453	-0.00638143	Q8H156	Symbols: RAN3, ATRAN3 | RAN GTPase 3 | chr5:22392285-22393957 FORWARD LENGTH=221;Symbols: RAN2 | RAS-related GTP-binding nuclear protein 2 | chr5:6762817-6764381 FORWARD LENGTH=221;Symbols: RAN-1, RAN1, ATRAN1 | RAS-related nuclear protein-1 | chr5:6760	181	274;398	38.52%	52	21.3931	AT5G55190	AT5G55190.1;AT5G20020.1;AT5G20010.1	AT5G55190.1;AT5G20020.1;AT5G20010.1
7.95543	8.0703	8.18631	7.9676	8.06528	8.19237	8.07068	8.07509	1.0102	0.964516	1	15.137	1062000000	0.0156906	0.992901	-0.004409	-0.00403331	NA	KV6AA_MOUSE | Ig kappa chain V-VI region NQ5-78.2.6;KV6A9_MOUSE | Ig kappa chain V-VI region NQ6-8.3.1;KV6A8_MOUSE | Ig kappa chain V-VI region NQ5-61.1.2;KV6A7_MOUSE | Ig kappa chain V-VI region NQ2-48.2.2;KV6A6_MOUSE | Ig kappa chain V-VI region NQ2	216	481	NA	NA	NA	P04944;P0	P04944;P04943;P04942;P04941;P04940	P04944;P04943;P04942;P04941;P04940
6.30895	5.40358	5.08275	5.56246	5.57515	5.66961	5.59843	5.60241	1.00921	0.9919	1	6.6809	4269800	0.0035321	0.997159	-0.00398191	-0.00290929	Q9SEE9	Symbols: SR45, RNPS1 | arginine/serine-rich 45 | chr1:5675925-5678686 REVERSE LENGTH=407;Symbols: SR45, RNPS1 | arginine/serine-rich 45 | chr1:5675925-5678686 REVERSE LENGTH=414;Symbols: SR45 | arginine/serine-rich 45 | chr1:5675925-5678686 REVERSE LENG	18	155	16.30%	22	3.97629	AT1G16610	AT1G16610.2;AT1G16610.1;AT1G16610.3	AT1G16610.2;AT1G16610.1;AT1G16610.3
6.60023	6.46938	6.39726	6.57188	6.43111	6.46708	6.48896	6.49002	1.00245	0.989057	6	17.676	27259000	0.00477883	1	-0.00106351	-0.000991259	O04313	Symbols: JAL31 | jacalin-related lectin 31 | chr3:5581830-5582959 FORWARD LENGTH=296;Symbols: JAL31 | jacalin-related lectin 31 | chr3:5581830-5582959 FORWARD LENGTH=296	119	213;422;500;501;535;675	28.15%	38	14.2903	AT3G16430	AT3G16430.2;AT3G16430.1	AT3G16430.2;AT3G16430.1
4.51	4.51	4.51	4.51	4.51	4.51	4.51	4.51	1	1	1	7.4824	0	-4.34294e-08	1	0	0	NA	Symbols: | Histone superfamily protein | chr5:26120099-26120509 REVERSE LENGTH=136;Symbols: | Histone superfamily protein | chr5:3472591-3473349 REVERSE LENGTH=136;Symbols: | Histone superfamily protein | chr5:3270478-3270888 REVERSE LENGTH=136;Symb	12	154	NA	NA	NA	AT5G65360	AT5G65360.1;AT5G10980.1;AT5G10400.1;AT5G10390.1;AT4G40040.2;AT4G40040.1;AT4G40030.3;AT4G40030.1;AT3G27360.1;AT1G13370.1;AT1G09200.1;AT1G19890.1;AT5G65350.1;AT4G40030.2	AT5G65360.1;AT5G10980.1;AT5G10400.1;AT5G10390.1;AT4G40040.2;AT4G40040.1;AT4G40030.3;AT4G40030.1;AT3G27360.1;AT1G13370.1;AT1G09200.1;AT1G19890.1;AT5G65350.1;AT4G40030.2
4.51	4.51	4.51	4.51	4.51	4.51	4.51	4.51	1	1	1	5.7774	0	-4.34294e-08	1	0	0	Q9C689	Symbols: | Nse4, component of Smc5/6 DNA repair complex | chr1:18939480-18941560 REVERSE LENGTH=403	37	147	0.00%	0	0	AT1G51130	AT1G51130.1	AT1G51130.1
4.51	4.51	4.51	4.51	4.51	4.51	4.51	4.51	1	1	1	5.8129	0	-4.34294e-08	1	0	0	F4I9J7	Symbols: Y14 | RNA-binding (RRM/RBD/RNP motifs) family protein | chr1:19103072-19104753 REVERSE LENGTH=202	38	92	8.89%	12	8.3422	AT1G51510	AT1G51510.1	AT1G51510.1
4.51	4.51	4.51	4.51	4.51	4.51	4.51	4.51	1	1	1	5.7474	0	-4.34294e-08	1	0	0	Q9C9C2	Symbols: | Calcium-dependent phosphotriesterase superfamily protein | chr1:27832432-27834017 REVERSE LENGTH=325	60	373	0.74%	1	7.12834	AT1G74010	AT1G74010.1	AT1G74010.1
4.51	4.51	4.51	4.51	4.51	4.51	4.51	4.51	1	1	1	5.7505	0	-4.34294e-08	1	0	0	F4IRK4	Symbols: | Bromo-adjacent homology (BAH) domain-containing protein | chr2:10689934-10691569 FORWARD LENGTH=380	78	618	0.00%	0	0	AT2G25120	AT2G25120.1	AT2G25120.1
4.51	4.51	4.51	4.51	4.51	4.51	4.51	4.51	1	1	1	5.9245	0	-4.34294e-08	1	0	0	F4IGR3	Symbols: | 60S acidic ribosomal protein family | chr2:11816929-11817670 FORWARD LENGTH=98;Symbols: | 60S acidic ribosomal protein family | chr2:11818696-11819370 FORWARD LENGTH=115;Symbols: | 60S acidic ribosomal protein family | chr2:11816929-118176	81	107	35.56%	48	17.7923	AT2G27710	AT2G27710.4;AT2G27720.1;AT2G27710.3;AT2G27710.2;AT2G27710.1;AT2G27720.3;AT2G27720.2	AT2G27710.4;AT2G27720.1;AT2G27710.3;AT2G27710.2;AT2G27710.1;AT2G27720.3;AT2G27720.2
4.51	4.51	4.51	4.51	4.51	4.51	4.51	4.51	1	1	1	6.314	0	-4.34294e-08	1	0	0	Q9SKX4	Symbols: | Ribosomal protein L3 family protein | chr2:17894898-17895713 FORWARD LENGTH=271	98	36	35.56%	48	697.994	AT2G43030	AT2G43030.1	AT2G43030.1
4.51	4.51	4.51	4.51	4.51	4.51	4.51	4.51	1	1	1	5.6959	0	-4.34294e-08	1	0	0	F4J117	Symbols: LSF1 | like SEX4 1 | chr3:198855-201682 REVERSE LENGTH=591	104	87	0.00%	0	0	AT3G01510	AT3G01510.1	AT3G01510.1
4.51	4.51	4.51	4.51	4.51	4.51	4.51	4.51	1	1	5	6.1662	0	-4.34294e-08	1	0	0	P53492	Symbols: ACT7 | actin 7 | chr5:3052809-3054220 FORWARD LENGTH=377	171	20;89;110;157;265	52.59%	71	14.1522	AT5G09810	AT5G09810.1	AT5G09810.1
4.51	4.51	4.51	4.51	4.51	4.51	4.51	4.51	1	1	1	6.0971	0	-4.34294e-08	1	0	0	Q9FFC7	Symbols: EMB86, EMB1030, EMB263 | Alanyl-tRNA synthetase, class IIc | chr5:7616221-7619961 REVERSE LENGTH=978	184	327	0.00%	0	0	AT5G22800	AT5G22800.1	AT5G22800.1
4.51	4.51	4.51	4.51	4.51	4.51	4.51	4.51	1	1	1	5.7071	0	-4.34294e-08	1	0	0	F4K7F4	Symbols: EXO84B | exocyst complex component 84B | chr5:20250803-20254766 REVERSE LENGTH=752;Symbols: EXO84B | exocyst complex component 84B | chr5:20250803-20254766 REVERSE LENGTH=783;Symbols: EXO84B | exocyst complex component 84B | chr5:20250803-20254	192	565	0.00%	0	0	AT5G49830	AT5G49830.1;AT5G49830.3;AT5G49830.2	AT5G49830.1;AT5G49830.3;AT5G49830.2
4.51	4.51	4.51	4.51	4.51	4.51	4.51	4.51	1	1	1	5.8526	0	-4.34294e-08	1	0	0	Q9S7M0	Symbols: LHCB3, LHCB3*1 | light-harvesting chlorophyll B-binding protein 3 | chr5:22038424-22039383 FORWARD LENGTH=265	196	684	12.59%	17	4.76707	AT5G54270	AT5G54270.1	AT5G54270.1
4.51	4.51	4.51	4.51	4.51	4.51	4.51	4.51	1	1	1	5.6838	0	-4.34294e-08	1	0	0	Q9LVC6	Symbols: VLN5 | villin, putative | chr5:23212690-23217549 FORWARD LENGTH=962	199	548	1.48%	2	3.83	AT5G57320	AT5G57320.1	AT5G57320.1
6.24199	6.13675	6.14289	6.149	6.3506	6.02135	6.17388	6.17365	0.999477	0.998325	1	6.6658	13572000	0.000727872	0.998599	0.000227133	0.000206161	Q9SLV3	Symbols: ZW9 | TRAF-like family protein | chr1:21612394-21614089 REVERSE LENGTH=396	48	644	6.67%	9	1.89222	AT1G58270	AT1G58270.1	AT1G58270.1
4.51	4.51	4.51435	4.51	4.51	4.51	4.51145	4.51	0.996668	0.373901	1	5.7223	184910	0.427243	0.999386	0.00144943	0.00144733	Q9LU41	Symbols: ACA9, ATACA9 | autoinhibited Ca(2+)-ATPase 9 | chr3:7425770-7431941 FORWARD LENGTH=1086	128	480	0.00%	0	0	AT3G21180	AT3G21180.1	AT3G21180.1
6.86022	7.02991	7.13865	7.15534	6.92023	6.93965	7.0096	7.00507	0.989644	0.969362	27	215.66	94408000	0.0135139	0.997585	0.00452089	0.00407056	NA	K2C5_HUMAN | Keratin, type II cytoskeletal 5 (58 kDa cytokeratin) (Cytokeratin-5) (CK-5) (Keratin-5) (K5) (Type-II keratin Kb5)	221	58;126;185;191;192;220;254;268;298;364;377;405;430;431;465;507;530;567;568;602;609;610;665;683;686;687;690	NA	NA	NA	P13647	P13647	P13647
6.55621	6.51124	6.32677	6.58014	6.42731	6.36652	6.46474	6.45799	0.984576	0.946586	1	6.2634	26730000	0.0238397	0.993289	0.00675058	0.00616668	F4JVB9	Symbols: CCR1, ATGRP8, GR-RBP8, GRP8 | cold, circadian rhythm, and RNA binding 1 | chr4:18274166-18274958 REVERSE LENGTH=92;Symbols: CCR1, ATGRP8, GR-RBP8, GRP8 | cold, circadian rhythm, and RNA binding 1 | chr4:18274166-18274958 REVERSE LENGTH=126;Symb	163	646	37.78%	51	116.202	AT4G39260	AT4G39260.3;AT4G39260.2;AT4G39260.1	AT4G39260.3;AT4G39260.2;AT4G39260.1
7.10106	6.78047	6.85652	6.98426	6.76307	6.95782	6.91268	6.90172	0.97507	0.931157	3	19.39	67821000	0.0309772	0.984885	0.0109642	0.00979616	Q9M352	Symbols: | Ribosomal protein L36e family protein | chr3:19913921-19914813 REVERSE LENGTH=103;Symbols: | Ribosomal protein L36e family protein | chr5:533501-534394 FORWARD LENGTH=108;Symbols: | Ribosomal protein L36e family protein | chr3:19913921-199	145	144;173;325	36.30%	49	7.4188	AT3G53740	AT3G53740.1;AT5G02450.1;AT3G53740.4;AT3G53740.3;AT3G53740.2;AT2G37600.2;AT2G37600.1	AT3G53740.1;AT5G02450.1;AT3G53740.4;AT3G53740.3;AT3G53740.2;AT2G37600.2;AT2G37600.1
5.84522	5.66559	5.74493	5.89752	5.62787	5.67274	5.75192	5.73271	0.956738	0.854586	1	5.8321	4819800	0.068244	0.951824	0.0192072	0.0174883	NA	FILA2_HUMAN | Filaggrin-2 (FLG-2) (Intermediate filament-associated and psoriasis-susceptibility protein) (Ifapsoriasin)	230	205	NA	NA	NA	Q5D862	Q5D862	Q5D862
5.37718	5.59368	5.63856	5.58662	5.23671	5.72032	5.53647	5.51455	0.950777	0.900859	1	6.2325	3048000	0.0453434	0.95734	0.0219212	0.0188128	F4IZU3	Symbols: UNE6 | LUC7 related protein | chr3:786439-789762 FORWARD LENGTH=402;Symbols: | LUC7 related protein | chr5:5749849-5753415 FORWARD LENGTH=404	107	34	11.11%	15	15.3895	AT3G03340	AT3G03340.1;AT5G17440.1	AT3G03340.1;AT5G17440.1
6.7329	6.4809	6.45852	6.47896	6.58561	6.53144	6.55744	6.532	0.943112	0.798422	3	18.329	29775000	0.0977676	0.94046	0.0254369	0.0232683	B9DFF8	Symbols: TUA6 | Tubulin/FtsZ family protein | chr4:8548753-8550319 REVERSE LENGTH=427;Symbols: TUA5 | tubulin alpha-5 | chr5:6687212-6688926 FORWARD LENGTH=450;Symbols: TUA3 | tubulin alpha-3 | chr5:6682761-6684474 REVERSE LENGTH=450;Symbols: TUA6 | Tu	7	73;133;140	45.93%	62	65.7027	AT4G14960	AT4G14960.1;AT5G19780.1;AT5G19770.1;AT4G14960.2;AT1G50010.1;AT1G04820.1;AT1G64740.1	AT4G14960.1;AT5G19780.1;AT5G19770.1;AT4G14960.2;AT1G50010.1;AT1G04820.1
7.84126	8.1825	8.06051	7.71449	8.10819	8.15902	8.02809	7.9939	0.9243	0.852426	5	121.41	992730000	0.0693432	0.924503	0.0341872	0.0291616	NA	IGHG1_MOUSE | Ig gamma-1 chain C region secreted form;IGH1M_MOUSE | Ig gamma-1 chain C region, membrane-bound form	208	52;53;91;528;660	NA	NA	NA	P01868;P0	P01868;P01869	P01868;P01869
5.56231	5.70671	5.5294	5.54475	5.51368	5.63665	5.59947	5.56503	0.92375	0.628229	1	6.251	3474100	0.201882	0.914444	0.0344458	0.0323196	Q94AK8	Symbols: | Ribosomal protein L10 family protein | chr1:8854163-8855766 REVERSE LENGTH=235	24	116	11.11%	15	3.39955	AT1G25260	AT1G25260.1	AT1G25260.1
7.24856	7.32476	7.33504	7.17528	7.2352	7.37208	7.30278	7.26085	0.907966	0.549977	9	61.976	167010000	0.259655	0.909125	0.0419304	0.0393967	O04309	Symbols: JR1 | Mannose-binding lectin superfamily protein | chr3:5596096-5597709 REVERSE LENGTH=451;Symbols: JR1 | Mannose-binding lectin superfamily protein | chr3:5596096-5597709 REVERSE LENGTH=451;Symbols: JR1 | Mannose-binding lectin superfamily pro	123	61;194;227;228;306;307;318;359;676	17.78%	24	4.36216	AT3G16470	AT3G16470.2;AT3G16470.1;AT3G16470.3;AT1G52000.1	AT3G16470.2;AT3G16470.1;AT3G16470.3
5.86709	5.81275	6.05496	5.77743	5.91432	5.91087	5.9116	5.86754	0.903531	0.635859	1	5.8064	6787200	0.196639	0.912947	0.0440571	0.040564	A8MRX3	Symbols: | unknown protein;FUNCTIONS IN: molecular_function unknown;INVOLVED IN: biological_process unknown;LOCATED IN: cellular_component unknown;Has 37 Blast hits to 37 proteins in 14 species: Archae - 0;Bacteria - 0;Metazoa - 0;Fungi - 0;Plant	33	21	8.15%	11	32.5048	AT1G47278	AT1G47278.1;AT1G47278.2	AT1G47278.1;AT1G47278.2
6.05717	6.0408	6.02358	5.93901	6.01565	6.01795	6.04052	5.99087	0.891977	0.147477	2	12.056	9045100	0.831277	0.890761	0.0496464	0.0483086	P51427	Symbols: ATRPS5A, AML1, RPS5A | ribosomal protein 5A | chr3:3778175-3779354 REVERSE LENGTH=207;Symbols: ATRPS5A, AML1, RPS5A | ribosomal protein 5A | chr3:3778175-3779354 REVERSE LENGTH=207;Symbols: ATRPS5B, RPS5B | ribosomal protein 5B | chr2:15647883-	90	260;394	55.56%	75	40.0615	AT3G11940	AT3G11940.2;AT3G11940.1;AT2G37270.2;AT2G37270.1	AT3G11940.2;AT3G11940.1;AT2G37270.2;AT2G37270.1
6.17583	6.12525	5.93893	6.03011	5.93983	6.12041	6.08	6.03012	0.891485	0.604706	1	6.2395	10303000	0.218456	0.890624	0.0498859	0.0458125	NA	Symbols: | Small nuclear ribonucleoprotein family protein | chr3:23235727-23236615 REVERSE LENGTH=108;Symbols: | Small nuclear ribonucleoprotein family protein | chr2:19537393-19538431 FORWARD LENGTH=108;Symbols: | Small nuclear ribonucleoprotein fam	103	436	NA	NA	NA	AT3G62840	AT3G62840.2;AT2G47640.3;AT2G47640.2;AT3G62840.1;AT2G47640.4;AT2G47640.1	AT3G62840.2;AT2G47640.3;AT2G47640.2;AT3G62840.1;AT2G47640.4;AT2G47640.1
4.51	5.81058	4.51	4.51	5.64971	4.51	4.94353	4.8899	0.883848	0.930357	4	26.165	2460900	0.0313505	0.904447	0.0536226	0.0340152	F4KGU2	Symbols: EMB3010, RPS6B | Ribosomal protein S6e | chr5:3258734-3260142 REVERSE LENGTH=249	172	49;262;319;320	47.41%	64	7.42756	AT5G10360	AT5G10360.1	AT5G10360.1
6.56535	6.61775	6.62511	6.56201	6.53599	6.54723	6.60274	6.54841	0.882414	0.055182	3	18.535	35802000	1.2582	0.881867	0.0543278	0.0532487	NA	Symbols: | Ribosomal protein S10p/S20e family protein | chr5:25021388-25022235 REVERSE LENGTH=124;Symbols: | Ribosomal protein S10p/S20e family protein | chr5:25021388-25022235 REVERSE LENGTH=124;Symbols: | Ribosomal protein S10p/S20e family protein	136	64;631;643	NA	NA	NA	AT5G62300	AT5G62300.2;AT5G62300.1;AT3G45030.1;AT3G47370.3;AT3G47370.2;AT3G47370.1	AT5G62300.2;AT5G62300.1;AT3G45030.1;AT3G47370.3;AT3G47370.2;AT3G47370.1
6.31165	6.35731	6.31975	6.16602	6.24942	6.4063	6.32957	6.27391	0.879718	0.481679	2	11.831	17224000	0.317243	0.885083	0.0556564	0.0519267	Q93VP3	Symbols: FBR12, ATELF5A-2, ELF5A-2 | Eukaryotic translation initiation factor 5A-1 (eIF-5A 1) protein | chr1:9205968-9207098 FORWARD LENGTH=159;Symbols: FBR12, ATELF5A-2, ELF5A-2 | Eukaryotic translation initiation factor 5A-1 (eIF-5A 1) protein | chr1:9	25	372;670	44.44%	60	8.54873	AT1G26630	AT1G26630.1;AT1G26630.2;AT1G69410.1;AT1G13950.1	AT1G26630.1;AT1G26630.2;AT1G69410.1;AT1G13950.1
6.39443	6.28946	6.11197	6.19218	6.15649	6.27014	6.26529	6.20627	0.872939	0.543527	2	12.469	15379000	0.264779	0.877207	0.0590162	0.054193	A8MRZ7	Symbols: EIF4A1, RH4, TIF4A1 | eukaryotic translation initiation factor 4A1 | chr3:4592635-4594094 REVERSE LENGTH=402;Symbols: EIF4A1 | eukaryotic translation initiation factor 4A1 | chr3:4592635-4594128 REVERSE LENGTH=407;Symbols: EIF4A-2 | eif4a-2 | c	44	161;247	64.44%	87	101.501	AT3G13920	AT3G13920.3;AT3G13920.4;AT1G54270.2;AT3G13920.1;AT1G54270.1;AT1G72730.1;AT3G13920.2	AT3G13920.3;AT3G13920.4;AT1G54270.2;AT3G13920.1;AT1G54270.1;AT1G72730.1;AT3G13920.2
4.51	5.47484	4.51	5.29756	4.51	4.51	4.83161	4.77252	0.872784	0.893693	1	5.701	1143100	0.0488115	0.904995	0.059093	0.0417573	Q9LHB9	Symbols: | Peroxidase superfamily protein | chr3:13526404-13529949 REVERSE LENGTH=352	133	5	10.37%	14	22.8915	AT3G32980	AT3G32980.1	AT3G32980.1
8.50737	8.4674	8.70545	8.55903	8.56344	8.37223	8.56007	8.49824	0.867284	0.558033	18	323.31	3492700000	0.25334	0.872859	0.0618385	0.0563761	NA	K1C9_HUMAN | Keratin, type I cytoskeletal 9 (Cytokeratin-9) (CK-9) (Keratin-9) (K9)	223	196;206;231;232;273;288;317;343;412;458;460;462;477;509;523;543;587;663	NA	NA	NA	P35527	P35527	P35527
5.99522	6.00212	6.06941	5.95633	5.9277	5.99346	6.02225	5.95916	0.864798	0.106354	1	5.8703	8797200	0.973246	0.857632	0.0630856	0.0612261	F4JB05	Symbols: | Ribosomal protein S5/Elongation factor G/III/V family protein | chr3:4112999-4115708 FORWARD LENGTH=767;Symbols: | Ribosomal protein S5/Elongation factor G/III/V family protein | chr3:4112999-4115708 FORWARD LENGTH=820;Symbols: LOS1 | Ribos	45	150	42.96%	58	55.1548	AT3G12915	AT3G12915.2;AT3G12915.1;AT1G56070.1	AT3G12915.2;AT3G12915.1;AT1G56070.1
5.81927	4.51	4.51	5.12675	5.00856	4.51	4.94642	4.88177	0.86168	0.898431	1	6.5197	995290	0.0465151	0.896599	0.0646539	0.0438157	O49499	Symbols: CCoAOMT1 | S-adenosyl-L-methionine-dependent methyltransferases superfamily protein | chr4:16310844-16311973 FORWARD LENGTH=148;Symbols: CCoAOMT1 | S-adenosyl-L-methionine-dependent methyltransferases superfamily protein | chr4:16310844-16311973	161	70	7.41%	10	7.74674	AT4G34050	AT4G34050.2;AT4G34050.1	AT4G34050.2;AT4G34050.1
6.20325	6.0023	6.13184	6.01005	6.11474	6.01339	6.11246	6.04606	0.858213	0.384809	2	11.499	10407000	0.414755	0.862465	0.0664048	0.0621702	NA	Symbols: ATP1 | ATP synthase subunit 1 | chrM:302166-303689 REVERSE LENGTH=507;Symbols: | ATPase, F1 complex, alpha subunit protein | chr2:3361474-3364028 FORWARD LENGTH=777	68	0;575	NA	NA	NA	ATMG01190	ATMG01190.1;AT2G07698.1	ATMG01190.1;AT2G07698.1
6.09951	6.5095	6.2062	6.1617	6.25758	6.19293	6.27174	6.20407	0.855723	0.619747	1	5.9603	17937000	0.207786	0.86144	0.067667	0.0600945	Q7DNC3	Symbols: PHT3;3 | phosphate transporter 3;3 | chr2:7510456-7512118 FORWARD LENGTH=309	70	674	0.00%	0	0	AT2G17270	AT2G17270.1	AT2G17270.1
7.86036	8.13947	8.06247	8.0865	7.93326	7.83767	8.02077	7.95248	0.854496	0.569542	31	323.31	1005800000	0.244474	0.861202	0.0682899	0.0615027	NA	K22E_HUMAN | Keratin, type II cytoskeletal 2 epidermal (Cytokeratin-2e) (CK-2e) (Epithelial keratin-2e) (Keratin-2 epidermis) (Keratin-2e) (K2e) (Type-II keratin Kb2)	224	56;59;128;135;143;191;192;201;219;225;233;234;261;270;281;330;331;364;375;445;486;520;529;544;556;557;632;657;686;687;700	NA	NA	NA	P35908;Q0	P35908;Q01546;Q7Z794;Q9DCV7;Q8N1N4	P35908
6.34676	6.00484	6.12231	6.24571	6.02354	5.99418	6.15797	6.08781	0.850819	0.612555	2	13.478	11398000	0.212855	0.867509	0.0701626	0.0622048	Q9LSB4	Symbols: NAI2 | DNA topoisomerase-related | chr3:5397783-5402610 REVERSE LENGTH=734;Symbols: NAI2 | DNA topoisomerase-related | chr3:5397783-5402610 REVERSE LENGTH=772	116	145;438	20.74%	28	27.1711	AT3G15950	AT3G15950.2;AT3G15950.1	AT3G15950.2;AT3G15950.1
6.05208	6.45105	6.04844	5.83147	6.43278	6.05219	6.18386	6.10548	0.834877	0.740379	2	14.973	16849000	0.130546	0.864379	0.0783774	0.0642091	Q1H583	Symbols: | GDSL-like Lipase/Acylhydrolase superfamily protein | chr1:20154548-20156365 REVERSE LENGTH=391	42	419;459	17.04%	23	7.8738	AT1G54000	AT1G54000.1	AT1G54000.1
6.49704	6.40765	6.42998	6.32728	6.36137	6.40936	6.44489	6.366	0.833899	0.092879	3	17.786	21695000	1.03208	0.819583	0.0788867	0.0761533	Q9C514	Symbols: | Ribosomal protein S7e family protein | chr1:18059854-18060935 REVERSE LENGTH=191;Symbols: | Ribosomal protein S7e family protein | chr1:18059854-18060935 REVERSE LENGTH=191	35	130;406;708	53.33%	72	34.0243	AT1G48830	AT1G48830.2;AT1G48830.1;AT3G02560.2;AT3G02560.1	AT1G48830.2;AT1G48830.1
5.93226	5.74936	5.75734	5.69328	5.68647	5.75963	5.81299	5.71312	0.794583	0.194146	1	5.7254	4929400	0.711872	0.816564	0.0998605	0.0938468	Q9FPF0	Symbols: | Class I glutamine amidotransferase-like superfamily protein | chr3:5047683-5049621 FORWARD LENGTH=369;Symbols: | Class I glutamine amidotransferase-like superfamily protein | chr3:5047683-5049621 FORWARD LENGTH=369;Symbols: | Class I gluta	114	336	26.67%	36	275.43	AT3G14990	AT3G14990.3;AT3G14990.2;AT3G14990.1	AT3G14990.3;AT3G14990.2;AT3G14990.1
6.24687	6.26404	6.53387	6.36442	6.17808	6.20202	6.34826	6.24818	0.794176	0.413725	15	146.91	18657000	0.383288	0.814658	0.100084	0.0901788	NA	K1C14_HUMAN | Keratin, type I cytoskeletal 14 (Cytokeratin-14) (CK-14) (Keratin-14) (K14)	210	32;55;175;255;299;334;343;344;351;425;468;491;492;649;667	NA	NA	NA	P02533	P02533	P02533
8.3361	8.48071	8.41696	8.3661	8.36122	8.19513	8.41126	8.30748	0.787456	0.212689	24	296.77	2186300000	0.672255	0.817143	0.103773	0.0969788	NA	K1C10_HUMAN | Keratin, type I cytoskeletal 10 (Cytokeratin-10) (CK-10) (Keratin-10) (K10)	219	7;33;259;272;287;334;343;344;350;363;424;444;469;474;475;494;495;508;525;537;538;650;667;693	NA	NA	NA	P13645;P0	P13645;P02535;Q148H6;P05784;Q7Z3Y7;Q2M2I5;P02534;Q14525;Q61765;Q15323;Q92764;Q14532;O76014;Q7Z3Z0;Q497I4;O76015;Q7Z3Y8;O76013;Q7Z3Y9	P13645
8.26468	8.53265	8.30724	8.23001	8.24272	8.28015	8.36819	8.25096	0.76343	0.237605	13	119.51	1898200000	0.624144	0.799465	0.117231	0.108097	Q9SR37	Symbols: PYK10, PSR3.1, BGLU23, LEB | Glycosyl hydrolase superfamily protein | chr3:2840657-2843730 REVERSE LENGTH=524	112	83;85;97;98;104;142;169;409;416;433;450;453;699	42.22%	57	626.705	AT3G09260	AT3G09260.1;AT5G28510.1	AT3G09260.1
6.96881	6.8156	6.70711	6.66258	6.70298	6.76179	6.83051	6.70912	0.75615	0.209217	7	43.967	51614000	0.679402	0.795223	0.121392	0.112276	A8MQP1	Symbols: HOG1, SAHH1 | S-adenosyl-L-homocysteine hydrolase | chr4:8054931-8056763 FORWARD LENGTH=325;Symbols: HOG1, SAHH1 | S-adenosyl-L-homocysteine hydrolase | chr4:8054931-8056676 FORWARD LENGTH=440;Symbols: HOG1, EMB1395, SAHH1, MEE58, ATSAHH1 | S-a	154	10;65;112;193;397;521;629	54.07%	73	11.3816	AT4G13940	AT4G13940.4;AT4G13940.3;AT4G13940.1;AT4G13940.2;AT3G23810.1	AT4G13940.4;AT4G13940.3;AT4G13940.1;AT4G13940.2;AT3G23810.1
8.37985	8.37458	8.48696	8.45349	8.28744	8.13367	8.4138	8.29153	0.754634	0.285833	25	256.18	2406700000	0.543888	0.793829	0.122264	0.111216	NA	K2C1_HUMAN | Keratin, type II cytoskeletal 1 (67 kDa cytokeratin) (Cytokeratin-1) (CK-1) (Hair alpha protein) (Keratin-1) (K1) (Type-II keratin Kb1)	215	8;127;134;201;222;281;313;340;379;380;430;431;434;441;464;489;490;517;527;588;594;595;686;687;689	NA	NA	NA	P04264;H-	P04264;H-INV:HIT000016045	P04264
6.34038	6.45185	6.40468	6.28841	6.25015	6.27743	6.39897	6.27199	0.746489	0.0206951	3	17.678	20402000	1.68413	0.799697	0.126976	0.122772	A8MS83	Symbols: RPL23AB | ribosomal protein L23AB | chr3:20500667-20501519 FORWARD LENGTH=148;Symbols: RPL23AB | ribosomal protein L23AB | chr3:20500667-20501519 FORWARD LENGTH=154;Symbols: RPL23AB | ribosomal protein L23AB | chr3:20500667-20501519 FORWARD LEN	93	395;414;707	40.74%	55	14.3051	AT3G55280	AT3G55280.3;AT3G55280.2;AT3G55280.1;AT2G39460.2;AT2G39460.1	AT3G55280.3;AT3G55280.2;AT3G55280.1;AT2G39460.2;AT2G39460.1
6.31175	6.21992	6.20984	6.17327	5.8926	6.28578	6.24717	6.11722	0.741391	0.344439	2	11.728	13499000	0.462888	0.791387	0.129953	0.115892	F4K6B6	Symbols: HSP81-2, ERD8, HSP90.2, AtHsp90.2 | heat shock protein 81-2 | chr5:22686923-22689433 FORWARD LENGTH=699;Symbols: HSP81-3, Hsp81.3, AtHsp90-3, AtHsp90.3 | heat shock protein 81-3 | chr5:22681410-22683911 FORWARD LENGTH=699;Symbols: Hsp81.4, AtHs	197	72;503	51.11%	69	44.9377	AT5G56030	AT5G56030.1;AT5G56010.1;AT5G56000.1;AT5G56030.2	AT5G56030.1;AT5G56010.1;AT5G56000.1;AT5G56030.2
6.48982	6.67002	6.52225	6.39345	6.47991	6.39259	6.5607	6.42198	0.726585	0.0909086	2	12.687	29441000	1.04139	0.796976	0.138713	0.130546	P49688	Symbols: | Ribosomal protein S5 family protein | chr2:17460016-17461398 REVERSE LENGTH=285;Symbols: | Ribosomal protein S5 family protein | chr3:21279824-21280887 REVERSE LENGTH=276;Symbols: | Ribosomal protein S5 family protein | chr1:21842537-21843	96	40;66	58.52%	79	28.1284	AT2G41840	AT2G41840.1;AT3G57490.1;AT1G59359.1;AT1G58983.1;AT1G58684.1;AT1G58380.1	AT2G41840.1;AT3G57490.1;AT1G59359.1;AT1G58983.1;AT1G58684.1;AT1G58380.1
4.51	4.93085	4.51	4.51	4.51	4.51	4.65028	4.51	0.723965	0.373901	1	5.856	407070	0.427243	0.797221	0.140282	0.123024	F4ID59	Symbols: | Protein kinase superfamily protein | chr1:24546860-24551119 REVERSE LENGTH=551	52	369	0.00%	0	0	AT1G65950	AT1G65950.1	AT1G65950.1
5.97375	5.7927	5.99507	5.80137	5.78834	5.74744	5.92051	5.77905	0.722011	0.0995261	1	5.8738	6174700	1.00206	0.795296	0.141456	0.132671	Q0WLB5	Symbols: | Clathrin, heavy chain | chr3:2587171-2595411 REVERSE LENGTH=1703;Symbols: | Clathrin, heavy chain | chr3:3482575-3491667 REVERSE LENGTH=1705	110	536	42.96%	58	145.944	AT3G08530	AT3G08530.1;AT3G11130.1	AT3G08530.1;AT3G11130.1
6.62837	6.46054	6.1614	6.0463	6.57661	6.19761	6.41677	6.27351	0.719015	0.530021	3	19.09	24427000	0.275707	0.798746	0.143262	0.118533	F4HRW5	Symbols: | Ribosomal protein L22p/L17e family protein | chr1:25262209-25263627 FORWARD LENGTH=175;Symbols: | Ribosomal protein L22p/L17e family protein | chr1:9515230-9516725 FORWARD LENGTH=176;Symbols: | Ribosomal protein L22p/L17e family protein |	26	246;454;701	42.96%	58	4.99359	AT1G67430	AT1G67430.1;AT1G27400.1;AT1G67430.2	AT1G67430.1;AT1G27400.1;AT1G67430.2
6.29737	6.64863	6.57679	6.2402	6.18537	6.66301	6.5076	6.36286	0.71658	0.477894	3	17.674	27641000	0.320668	0.794617	0.144735	0.122132	NA	Symbols: | Ribosomal protein S14p/S29e family protein | chr4:16233395-16234114 REVERSE LENGTH=56;Symbols: | Ribosomal protein S14p/S29e family protein | chr3:15800175-15801132 REVERSE LENGTH=56;Symbols: | Ribosomal protein S14p/S29e family protein |	135	236;630;696	NA	NA	NA	AT4G33865	AT4G33865.1;AT3G44010.1;AT3G43980.1	AT4G33865.1;AT3G44010.1;AT3G43980.1
4.51	4.96122	4.51	4.51	4.51	4.51	4.66041	4.51	0.707285	0.373901	1	5.6911	266400	0.427243	0.79454	0.150406	0.130741	Q3EDD3	Symbols: | Protein of unknown function (DUF1262) | chr1:4637072-4638315 REVERSE LENGTH=388	16	680	0.00%	0	0	AT1G13550	AT1G13550.1	AT1G13550.1
5.73735	5.91269	5.68279	5.30337	5.91872	5.65861	5.77761	5.6269	0.706785	0.474967	1	5.9892	5428300	0.323337	0.793231	0.150713	0.126506	A8MRV1	Symbols: | Histone superfamily protein | chr1:2369212-2369523 FORWARD LENGTH=86;Symbols: | Histone superfamily protein | chr5:24146352-24146663 REVERSE LENGTH=103;Symbols: | Histone superfamily protein | chr5:24051649-24051960 FORWARD LENGTH=103;Sym	9	297	70.37%	95	15.0258	AT1G07660	AT1G07660.2;AT5G59970.1;AT5G59690.1;AT3G53730.1;AT3G46320.1;AT3G45930.1;AT2G28740.1;AT1G07820.2;AT1G07820.1;AT1G07660.1	AT1G07660.2;AT5G59970.1;AT5G59690.1;AT3G53730.1;AT3G46320.1;AT3G45930.1;AT2G28740.1;AT1G07820.2;AT1G07820.1;AT1G07660.1
7.46829	7.71279	7.51388	7.46712	7.44124	7.31733	7.56499	7.40856	0.69755	0.150662	2	12.392	315850000	0.821995	0.800542	0.156425	0.143752	Q9LTQ5	Symbols: | TRAF-like family protein | chr3:7105481-7107079 FORWARD LENGTH=379	127	115;403	17.78%	24	2.03255	AT3G20370	AT3G20370.1	AT3G20370.1
6.00247	6.15045	6.17187	5.80226	5.88136	6.16095	6.10826	5.94819	0.691714	0.256877	1	5.6952	9831600	0.590275	0.796538	0.160073	0.142778	F4I529	Symbols: CRT1, CRT1a, AtCRT1a | calreticulin 1a | chr1:21090022-21092630 REVERSE LENGTH=424;Symbols: CRT1, CRT1a, AtCRT1a | calreticulin 1a | chr1:21090059-21092630 REVERSE LENGTH=425	46	289	12.59%	17	19.2278	AT1G56340	AT1G56340.2;AT1G56340.1	AT1G56340.2;AT1G56340.1
6.06689	6.23439	6.2512	5.95802	6.00186	6.09937	6.18416	6.01975	0.684847	0.084934	6	12.169	13503000	1.07092	0.800036	0.164406	0.153341	F4KDU5	Symbols: | Ribosomal protein L4/L1 family | chr5:657830-659526 FORWARD LENGTH=407;Symbols: | Ribosomal protein L4/L1 family | chr5:657830-659526 FORWARD LENGTH=406	167	22;341;411;440;463;672	37.04%	50	3.78536	AT5G02870	AT5G02870.1;AT5G02870.2	AT5G02870.1;AT5G02870.2
4.51	4.51	5.03543	4.51	4.51	4.51	4.68514	4.51	0.668124	0.373901	1	5.6825	413740	0.427243	0.80087	0.175143	0.14904	O65023	Symbols: | Mitochondrial substrate carrier family protein | chr3:19243978-19246611 FORWARD LENGTH=381	140	656	0.00%	0	0	AT3G51870	AT3G51870.1	AT3G51870.1
4.51	5.04234	4.51	4.51	4.51	4.51	4.68745	4.51	0.66459	0.373901	1	6.1007	321120	0.427243	0.792596	0.177446	0.150704	Q9FKA7	Symbols: VIM3, ORTH1 | Zinc finger (C3HC4-type RING finger) family protein | chr5:15837408-15840503 REVERSE LENGTH=617;Symbols: VIM4, ORTH4 | Zinc finger (C3HC4-type RING finger) family protein | chr1:24583820-24586681 REVERSE LENGTH=622;Symbols: VIM2,	53	381	0.00%	0	0	AT5G39550	AT5G39550.1;AT1G66040.1;AT1G66050.1	AT5G39550.1;AT1G66040.1;AT1G66050.1
5.74421	6.29361	6.04001	6.11644	5.64708	5.76242	6.02594	5.84198	0.654694	0.435431	1	6.0025	10091000	0.361081	0.797487	0.183961	0.151724	Q949Q0	Symbols: GLY1, SFD1 | NAD-dependent glycerol-3-phosphate dehydrogenase family protein | chr2:16974107-16976241 FORWARD LENGTH=420	95	566	0.00%	0	0	AT2G40690	AT2G40690.1	AT2G40690.1
6.59046	6.39702	6.46162	6.549	6.06502	6.26607	6.48303	6.29336	0.646145	0.278684	3	5.701	23842000	0.554888	0.814248	0.18967	0.164722	NA	RS27A_HUMAN | Ubiquitin-40S ribosomal protein S27a (Ubiquitin carboxyl extension protein 80) [Cleaved into: Ubiquitin;40S ribosomal protein S27a]	228	171;296;590	NA	NA	NA	P62979	P62979	P62979
6.24827	5.94145	5.81284	5.89047	5.75901	5.75744	6.00085	5.80231	0.633074	0.21941	2	11.459	6427400	0.658744	0.812396	0.198545	0.174703	P93819	Symbols: | Lactate/malate dehydrogenase family protein | chr1:1189418-1191267 REVERSE LENGTH=332	6	35;664	40.74%	55	9.95591	AT1G04410	AT1G04410.1	AT1G04410.1
7.13472	7.31553	7.27031	6.99188	7.00647	7.06882	7.24018	7.02239	0.605624	0.0212537	5	59.796	166180000	1.67256	0.748701	0.217797	0.205619	O04311	Symbols: | Mannose-binding lectin superfamily protein | chr3:5588593-5589792 FORWARD LENGTH=300;Symbols: | Mannose-binding lectin superfamily protein | chr3:5588593-5589792 FORWARD LENGTH=300;Symbols: | Mannose-binding lectin superfamily protein | ch	121	122;604;605;635;677	18.52%	25	1.15636	AT3G16450	AT3G16450.3;AT3G16450.2;AT3G16450.1	AT3G16450.3;AT3G16450.2;AT3G16450.1
6.37539	6.12349	6.17664	5.96155	6.07379	5.96068	6.22517	5.99867	0.593608	0.0567857	1	5.862	11489000	1.24576	0.754979	0.226501	0.208686	O65660	Symbols: | Lipase/lipooxygenase, PLAT/LH2 family protein | chr4:18432950-18433581 FORWARD LENGTH=181;Symbols: | Lipase/lipooxygenase, PLAT/LH2 family protein | chr2:9427010-9427742 REVERSE LENGTH=183	77	26	8.89%	12	8.79219	AT4G39730	AT4G39730.1;AT2G22170.1	AT4G39730.1;AT2G22170.1
6.2997	6.00949	6.02878	5.90281	5.78703	5.95191	6.11266	5.88058	0.586039	0.09305	2	12.378	9457700	1.03128	0.759183	0.232073	0.209893	O04318	Symbols: NSP3 | nitrile specifier protein 3 | chr3:5562602-5564356 FORWARD LENGTH=467;Symbols: ATMLP-470 | nitrile specifier protein 1 | chr3:5566516-5568330 FORWARD LENGTH=470;Symbols: ATMLP-470, NSP1, ATNSP1 | nitrile specifier protein 1 | chr3:556651	117	226;365	9.63%	13	32.307	AT3G16390	AT3G16390.1;AT3G16400.2;AT3G16400.1;AT3G16410.1;AT2G33070.2;AT2G33070.1;AT2G33070.3	AT3G16390.1;AT3G16400.2;AT3G16400.1;AT3G16410.1;AT2G33070.2;AT2G33070.1;AT2G33070.3
4.51	5.24517	4.51	4.51	4.51	4.51	4.75506	4.51	0.56878	0.373901	1	6.0247	1035100	0.427243	0.758303	0.245056	0.196823	Q9ZT91	Symbols: | GTP binding Elongation factor Tu family protein | chr4:1295751-1298354 REVERSE LENGTH=454	153	153	40.74%	55	18.047	AT4G02930	AT4G02930.1	AT4G02930.1
6.2966	5.85825	4.51	5.73154	4.51	5.68616	5.55495	5.30923	0.567914	0.732376	1	6.78	5742300	0.135266	0.798667	0.245717	0.147139	Q9FVT2	Symbols: | Translation elongation factor EF1B, gamma chain | chr1:21377873-21380114 FORWARD LENGTH=413;Symbols: | Translation elongation factor EF1B, gamma chain | chr1:21377873-21380114 FORWARD LENGTH=413	47	43	20.74%	28	10.4956	AT1G57720	AT1G57720.2;AT1G57720.1	AT1G57720.2;AT1G57720.1
6.33405	6.0974	6.41196	6.1495	5.80696	6.12372	6.28113	6.02673	0.556661	0.154573	12	17.402	13632000	0.810865	0.750517	0.254409	0.222158	NA	K1C17_HUMAN | Keratin, type I cytoskeletal 17 (39.1) (Cytokeratin-17) (CK-17) (Keratin-17) (K17);K1C17_MOUSE | Keratin, type I cytoskeletal 17 (Cytokeratin-17) (CK-17) (Keratin-17) (K17);K1C19_HUMAN | Keratin, type I cytoskeletal 19 (Cytokeratin-19) (CK	229	67;175;334;343;344;351;425;491;492;578;581;649	NA	NA	NA	Q04695;Q9	Q04695;Q9QWL7;P08727;P19001;Q61782;Q8N1A0;Q9C075;Q99PS0;P35900;Q9D312	Q04695;Q9QWL7;P08727
7.21035	6.94358	7.05061	6.81217	6.82479	6.80087	7.06818	6.81261	0.555174	0.0303757	5	33.922	81974000	1.51747	0.739349	0.255571	0.237119	Q9LF98	Symbols: | Aldolase superfamily protein | chr3:19627383-19628874 REVERSE LENGTH=358;Symbols: | Aldolase superfamily protein | chr2:15296929-15298387 REVERSE LENGTH=358	142	1;39;50;242;432	45.19%	61	19.1086	AT3G52930	AT3G52930.1;AT2G36460.1;AT2G36460.2;AT4G26530.2;AT4G26530.1;AT5G03690.2;AT5G03690.1	AT3G52930.1;AT2G36460.1
4.51	4.51	5.29221	4.51	4.51	4.51	4.77074	4.51	0.548609	0.373901	1	6.0889	3731300	0.427243	0.742542	0.260737	0.206813	Q9LV05	Symbols: | unknown protein;FUNCTIONS IN: molecular_function unknown;INVOLVED IN: biological_process unknown;LOCATED IN: cytosol;EXPRESSED IN: 25 plant structures;EXPRESSED DURING: 15 growth stages;Has 1807 Blast hits to 1807 proteins in 277 species	194	172	26.67%	36	4.21773	AT5G53440	AT5G53440.1	AT5G53440.1
7.53439	6.8168	7.05549	7.08785	6.93958	6.56827	7.13556	6.86523	0.536625	0.359682	8	51.367	101610000	0.444081	0.763429	0.270329	0.214289	NA	ALBU_HUMAN | Serum albumin	212	11;78;347;564;622;661;698;706	NA	NA	NA	P02768	P02768	P02768
6.10113	5.82608	5.93078	5.79732	5.53138	5.71688	5.95266	5.68186	0.536039	0.0735413	1	6.002	6142200	1.13347	0.729524	0.270804	0.24345	B3H5Y0	Symbols: ACO1 | aconitase 1 | chr4:16973007-16977278 REVERSE LENGTH=795;Symbols: ACO1 | aconitase 1 | chr4:16973007-16977949 REVERSE LENGTH=898;Symbols: ACO3 | aconitase 3 | chr2:2141591-2146350 FORWARD LENGTH=990	67	603	11.85%	16	11.6194	AT4G35830	AT4G35830.2;AT4G35830.1;AT2G05710.1	AT4G35830.2;AT4G35830.1;AT2G05710.1
6.5996	6.02979	6.12277	6.17216	5.81399	5.93947	6.25072	5.97521	0.530259	0.250765	4	25.689	13382000	0.600732	0.737273	0.275512	0.228578	Q9SRZ6	Symbols: cICDH | cytosolic NADP+-dependent isocitrate dehydrogenase | chr1:24539088-24541861 FORWARD LENGTH=410	51	14;77;349;577	29.63%	40	8.20443	AT1G65930	AT1G65930.1;AT1G54340.1;AT5G14590.1	AT1G65930.1
5.75696	5.85812	5.72064	5.86461	6.07864	4.51	5.77857	5.48441	0.507972	0.582729	1	5.7189	6240900	0.234533	0.766041	0.29416	0.197049	P16181	Symbols: EMB1080 | Nucleic acid-binding, OB-fold-like protein | chr3:18141017-18142189 REVERSE LENGTH=160	137	136	45.93%	62	17.5307	AT3G48930	AT3G48930.1	AT3G48930.1
6.51857	6.04171	6.26891	6.10449	5.52541	6.25174	6.27639	5.96054	0.483226	0.292795	1	5.8525	12767000	0.533436	0.710361	0.31585	0.250482	Q9LMX6	Symbols: | Nuclear transport factor 2 (NTF2) family protein with RNA binding (RRM-RBD-RNP motifs) domain | chr1:4710519-4712332 FORWARD LENGTH=428	17	452	0.74%	1	2.98933	AT1G13730	AT1G13730.1	AT1G13730.1
4.51	4.51	5.47433	4.51	4.51	4.51	4.83144	4.51	0.477041	0.373901	1	6.2201	3194600	0.427243	0.722024	0.321444	0.243252	Q9SN35	Symbols: ATHSGBP, ATRAB11B, ATRABA1D, RABA1d | RAB GTPase homolog A1D | chr4:10320156-10321339 REVERSE LENGTH=214;Symbols: AtRABA1c, RABA1c | RAB GTPase homolog A1C | chr5:18559318-18560639 FORWARD LENGTH=216;Symbols: RAB11, ATRABA1B, RABA1b | RAB GTPas	14	671	5.93%	8	2.86394	AT4G18800	AT4G18800.1;AT5G45750.1;AT1G16920.1;AT5G60860.1;AT3G15060.1;AT1G09630.1	AT4G18800.1;AT5G45750.1;AT1G16920.1;AT5G60860.1;AT3G15060.1;AT1G09630.1
5.93414	5.3041	5.26998	5.2403	5.13682	5.15752	5.50274	5.17821	0.473664	0.211189	1	5.6798	2465100	0.675328	0.710076	0.32453	0.266395	Q9LYR4	Symbols: | Aldolase-type TIM barrel family protein | chr5:4302080-4304212 REVERSE LENGTH=438	174	337	11.85%	16	9.61614	AT5G13420	AT5G13420.1	AT5G13420.1
6.02678	5.92671	5.95436	5.72482	5.59409	5.53228	5.96928	5.61707	0.444408	0.00535232	1	6.3122	6324500	2.27146	0.63929	0.352218	0.330994	NA	TRFL_HUMAN | Lactotransferrin (Lactoferrin) (EC 3.4.21.-) (Growth-inhibiting protein 12) (Talalactoferrin) [Cleaved into: Lactoferricin-H (Lfcin-H);Kaliocin-1;Lactoferroxin-A;Lactoferroxin-B;Lactoferroxin-C]	214	99	NA	NA	NA	P02788	P02788	P02788
5.24993	5.34412	5.19912	5.05081	5.16894	4.51	5.26439	4.90991	0.442103	0.162359	1	6.0123	1364900	0.789524	0.687111	0.354476	0.293624	Q9ZU52	Symbols: | Aldolase superfamily protein | chr2:95006-96491 REVERSE LENGTH=391	65	342	22.22%	30	534.815	AT2G01140	AT2G01140.1	AT2G01140.1
6.69175	4.68631	4.59011	5.28513	5.01064	4.58456	5.32272	4.96011	0.433897	0.638618	1	5.7909	6045400	0.194759	0.760304	0.362613	0.211467	NA	THIO_HUMAN | Thioredoxin (Trx) (ATL-derived factor) (ADF) (Surface-associated sulphydryl protein) (SASP)	218	639	NA	NA	NA	P10599	P10599	P10599
6.97236	6.65861	6.6825	6.5504	6.33052	6.33167	6.77115	6.4042	0.429576	0.042122	6	36.797	42847000	1.37549	0.640125	0.36696	0.326318	O50008	Symbols: ATCIMS | Cobalamin-independent synthase family protein | chr5:5935771-5939195 FORWARD LENGTH=765;Symbols: ATCIMS, ATMETS, ATMS1 | Cobalamin-independent synthase family protein | chr5:5935771-5939195 FORWARD LENGTH=765;Symbols: ATMS2, MS2 | meth	180	28;29;60;75;295;709	65.19%	88	10.7692	AT5G17920	AT5G17920.2;AT5G17920.1;AT3G03780.3;AT3G03780.2;AT3G03780.1	AT5G17920.2;AT5G17920.1;AT3G03780.3;AT3G03780.2;AT3G03780.1
6.71084	6.5998	7.09202	6.91722	6.29024	6.05438	6.80088	6.42061	0.416608	0.270305	16	121.43	55055000	0.568146	0.677699	0.380272	0.29308	NA	K1C16_HUMAN | Keratin, type I cytoskeletal 16 (Cytokeratin-16) (CK-16) (Keratin-16) (K16)	217	32;54;113;174;177;255;299;334;343;344;351;476;497;583;649;667	NA	NA	NA	P08779;Q3	P08779;Q3ZAW8;Q9Z2K1	P08779
6.62233	6.49815	6.46571	6.09304	6.12814	6.1858	6.52873	6.13566	0.404511	0.00200798	4	32.61	19365000	2.69724	0.510431	0.39307	0.372629	P83484	Symbols: | ATP synthase alpha/beta family protein | chr5:2825739-2828352 FORWARD LENGTH=556;Symbols: | ATP synthase alpha/beta family protein | chr5:2818395-2821149 REVERSE LENGTH=556;Symbols: | ATP synthase alpha/beta family protein | chr5:2821992-2	170	167;286;293;576	54.81%	74	12.376	AT5G08690	AT5G08690.1;AT5G08670.1;AT5G08680.1;ATCG00480.1	AT5G08690.1;AT5G08670.1;AT5G08680.1
4.51	5.65335	5.51795	4.51	4.51	5.4792	5.2271	4.83307	0.403616	0.461446	1	6.4962	2026000	0.335879	0.7038	0.394031	0.265483	Q8W4H8	Symbols: | GDSL-like Lipase/Acylhydrolase superfamily protein | chr1:20158854-20160747 REVERSE LENGTH=386	43	166	20.74%	28	6.24827	AT1G54010	AT1G54010.1	AT1G54010.1
4.51	4.51	5.70642	4.51	4.51	4.51	4.90881	4.51	0.399203	0.373901	2	11.889	7588900	0.427243	0.687105	0.398806	0.285105	Q9FMU6	Symbols: PHT3;1 | phosphate transporter 3;1 | chr5:4531059-4532965 REVERSE LENGTH=375	175	487;624	25.93%	35	20.1257	AT5G14040	AT5G14040.1	AT5G14040.1
4.51	5.73819	4.51	4.51	4.51	4.51	4.9194	4.51	0.389587	0.373901	1	5.7202	5383900	0.427243	0.675459	0.409395	0.290476	Q6NPN4	Symbols: | Peptidoglycan-binding LysM domain-containing protein | chr1:29173726-29175387 FORWARD LENGTH=423	61	208	0.00%	0	0	AT1G77630	AT1G77630.1	AT1G77630.1
5.71117	5.63321	4.51	4.51	5.56198	4.51	5.28479	4.86066	0.376589	0.462895	2	16.696	2195400	0.334518	0.697195	0.424132	0.278482	O23654	Symbols: VHA-A | vacuolar ATP synthase subunit A | chr1:29660463-29664575 FORWARD LENGTH=623;Symbols: VHA-A | vacuolar ATP synthase subunit A | chr1:29660463-29664575 FORWARD LENGTH=623	62	335;611	37.78%	51	20.3505	AT1G78900	AT1G78900.2;AT1G78900.1	AT1G78900.2;AT1G78900.1
6.74374	6.31894	6.50636	5.96485	6.12241	6.19313	6.52301	6.09346	0.371921	0.0375269	3	17.786	21383000	1.42566	0.522667	0.429549	0.376728	F4K007	Symbols: BIP, BIP2 | Heat shock protein 70 (Hsp 70) family protein | chr5:16807697-16810480 REVERSE LENGTH=668;Symbols: BIP1 | heat shock protein 70 (Hsp 70) family protein | chr5:10540665-10543274 REVERSE LENGTH=669	189	303;388;439	43.70%	59	16.4792	AT5G42020	AT5G42020.1;AT5G28540.1;AT5G42020.2	AT5G42020.1;AT5G28540.1
5.94246	5.83437	4.51	4.51	5.97562	4.51	5.42894	4.99854	0.371189	0.556364	1	5.9861	4133000	0.254641	0.706537	0.430405	0.257513	B3H746	Symbols: ROF1, ATFKBP62, FKBP62 | rotamase FKBP 1 | chr3:9188257-9191137 FORWARD LENGTH=551;Symbols: ROF1, ATFKBP62, FKBP62 | rotamase FKBP 1 | chr3:9188257-9191175 FORWARD LENGTH=562	131	653	11.85%	16	6.79055	AT3G25230	AT3G25230.1;AT3G25230.2	AT3G25230.1;AT3G25230.2
4.51	4.51	5.80398	4.51	4.51	4.51	4.94133	4.51	0.370403	0.373901	1	5.7217	4784900	0.427243	0.671662	0.431325	0.301347	B3DN87	Symbols: | DHHC-type zinc finger family protein | chr3:21070834-21072441 FORWARD LENGTH=338	149	356	0.00%	0	0	AT3G56920	AT3G56920.1	AT3G56920.1
4.51	4.51	5.84537	4.51	4.51	4.51	4.95512	4.51	0.35882	0.373901	1	6.4711	1910600	0.427243	0.675701	0.445124	0.308018	Q9T0I6	Symbols: | Pre-mRNA-processing-splicing factor | chr4:18101438-18111029 REVERSE LENGTH=2332;Symbols: SUS2, EMB33, EMB177, EMB14 | Pre-mRNA-processing-splicing factor | chr1:30118052-30127574 FORWARD LENGTH=2359	64	560	11.11%	15	2.3549	AT4G38780	AT4G38780.1;AT1G80070.1	AT4G38780.1;AT1G80070.1
5.65776	5.91103	5.68747	5.6223	5.69697	4.51	5.75209	5.27642	0.334454	0.291772	1	5.816	4677700	0.534957	0.605356	0.475663	0.3417	Q38799	Symbols: MAB1 | Transketolase family protein | chr5:20689671-20692976 FORWARD LENGTH=363	193	648	12.59%	17	24.7377	AT5G50850	AT5G50850.1	AT5G50850.1
4.51	4.51	5.94065	4.51	4.51	4.51	4.98688	4.51	0.333516	0.373901	1	5.6855	10072000	0.427243	0.636492	0.476884	0.322899	Q8L8W5	Symbols: | Cyclophilin-like peptidyl-prolyl cis-trans isomerase family protein | chr3:20743529-20745049 REVERSE LENGTH=228	147	290	0.00%	0	0	AT3G55920	AT3G55920.1	AT3G55920.1
6.94514	6.27342	6.72017	6.35309	5.9512	6.1724	6.64624	6.1589	0.325577	0.100489	2	12.011	27545000	0.997883	0.43522	0.487347	0.396517	NA	LYSC_HUMAN | Lysozyme C (EC 3.2.1.17) (1,4-beta-N-acetylmuramidase C)	227	69;354	NA	NA	NA	P61626	P61626	P61626
4.51	4.51	5.98637	4.51	4.51	4.51	5.00212	4.51	0.322015	0.373901	1	5.7193	3140400	0.427243	0.630603	0.492124	0.329815	F4INW9	Symbols: | Protein of unknown function, DUF593 | chr2:13076229-13078595 FORWARD LENGTH=760	82	685	0.00%	0	0	AT2G30690	AT2G30690.1	AT2G30690.1
4.51	4.51	5.99666	4.51	4.51	4.51	5.00555	4.51	0.319482	0.373901	2	14.218	6238600	0.427243	0.631869	0.495553	0.331351	P25696	Symbols: LOS2, ENO2 | Enolase | chr2:15321081-15323786 REVERSE LENGTH=444	87	102;485	42.96%	58	14.5698	AT2G36530	AT2G36530.1	AT2G36530.1
4.51	6.44895	6.35585	5.14786	5.28652	5.377	5.7716	5.27046	0.315398	0.474064	1	6.5155	11804000	0.324163	0.678203	0.501142	0.306531	Q5BPZ6	Symbols: | unknown protein;BEST Arabidopsis thaliana protein match is: unknown protein (TAIR:AT1G22970.1);Has 52 Blast hits to 50 proteins in 17 species: Archae - 0;Bacteria - 0;Metazoa - 8;Fungi - 0;Plants - 44;Viruses - 0;Other Eukaryotes - 0 (	23	366	0.00%	0	0	AT1G22980	AT1G22980.1	AT1G22980.1
6.07507	6.09771	4.51	6.15082	4.51	4.51	5.56093	5.05694	0.313338	0.542738	1	5.6767	6655900	0.26541	0.685333	0.503987	0.286604	Q9MAU6	Symbols: ATPDIL2-2, ATPDI10, PDI10, PDIL2-2 | PDI-like 2-2 | chr1:1413869-1416120 REVERSE LENGTH=447	8	549	8.89%	12	7.95232	AT1G04980	AT1G04980.1	AT1G04980.1
5.80309	5.76806	5.71873	4.51	5.56147	5.67593	5.76329	5.24913	0.306084	0.238933	2	16.971	3870800	0.621724	0.51696	0.514159	0.374793	O04204	Symbols: | Ribosomal protein L10 family protein | chr2:16708578-16710448 REVERSE LENGTH=317;Symbols: | Ribosomal protein L10 family protein | chr3:2823364-2825020 REVERSE LENGTH=320;Symbols: | Ribosomal protein L10 family protein | chr3:3521453-35228	94	216;640	24.44%	33	30.8138	AT2G40010	AT2G40010.1;AT3G09200.1;AT3G11250.1;AT3G09200.2	AT2G40010.1;AT3G09200.1;AT3G11250.1;AT3G09200.2
4.51	4.51	6.09667	4.51	4.51	4.51	5.03889	4.51	0.295877	0.373901	1	5.7713	5594600	0.427243	0.585614	0.528889	0.34593	P14671	Symbols: TSB1, TRPB, TRP2, ATTSB1 | tryptophan synthase beta-subunit 1 | chr5:22264805-22266738 REVERSE LENGTH=470;Symbols: TSB2 | tryptophan synthase beta-subunit 2 | chr4:13586564-13588619 FORWARD LENGTH=475	158	392	2.96%	4	5.20323	AT5G54810	AT5G54810.1;AT4G27070.1	AT5G54810.1;AT4G27070.1
6.26238	5.80353	4.51	4.51	5.96188	4.51	5.5253	4.99396	0.294208	0.497979	1	5.8773	4868000	0.302789	0.676667	0.531345	0.310044	P34790	Symbols: ROC1 | rotamase CYP 1 | chr4:18083620-18084138 REVERSE LENGTH=172;Symbols: | Cyclophilin-like peptidyl-prolyl cis-trans isomerase family protein | chr2:9055619-9056143 REVERSE LENGTH=174	75	305	13.33%	18	7.0931	AT4G38740	AT4G38740.1;AT2G21130.1	AT4G38740.1;AT2G21130.1
4.51	6.11574	4.51	4.51	4.51	4.51	5.04525	4.51	0.291576	0.373901	1	6.3407	3802600	0.427243	0.573357	0.535248	0.348639	Q9ASR0	Symbols: TUB3 | tubulin beta chain 3 | chr5:25184501-25186426 FORWARD LENGTH=450;Symbols: TUB2 | tubulin beta chain 2 | chr5:25181560-25183501 FORWARD LENGTH=450	201	710	62.96%	85	68.189	AT5G62700	AT5G62700.1;AT5G62690.1	AT5G62700.1;AT5G62690.1
4.51	6.12875	4.51	4.51	4.51	4.51	5.04958	4.51	0.288679	0.373901	1	5.7394	3918200	0.427243	0.560218	0.539585	0.350474	F4JCM3	Symbols: | unknown protein;Has 0 Blast hits to 0 proteins in 0 species (source: NCBI BLink). | chr3:14038360-14039358 FORWARD LENGTH=198	134	383	0.00%	0	0	AT3G33494	AT3G33494.1	AT3G33494.1
5.38081	6.36513	6.08955	5.44518	6.21667	4.51	5.94516	5.39062	0.278903	0.388664	1	7.205	11277000	0.410425	0.560593	0.554547	0.352327	Q9FHG2	Symbols: | Ribosomal protein L32e | chr5:18833429-18834409 FORWARD LENGTH=133;Symbols: | Ribosomal protein L32e | chr5:18833429-18834409 FORWARD LENGTH=133;Symbols: | Ribosomal protein L32e | chr4:10035715-10036475 REVERSE LENGTH=133	156	263	40.00%	54	4.21571	AT5G46430	AT5G46430.2;AT5G46430.1;AT4G18100.1	AT5G46430.2;AT5G46430.1;AT4G18100.1
6.07482	5.75678	5.74114	5.68536	4.51	5.70281	5.85758	5.29939	0.276572	0.244461	1	5.7876	4928700	0.61179	0.424857	0.558191	0.396043	A8MSC5	Symbols: ATPDIL2-1, UNE5, MEE30, PDI11, ATPDI11 | thioredoxin family protein | chr2:19481503-19483571 FORWARD LENGTH=323;Symbols: ATPDIL2-1, UNE5, MEE30, PDI11, ATPDI11 | thioredoxin family protein | chr2:19481503-19483683 FORWARD LENGTH=361	102	279	17.78%	24	19.5218	AT2G47470	AT2G47470.3;AT2G47470.1	AT2G47470.3;AT2G47470.1
4.51	4.51	6.19758	4.51	4.51	4.51	5.07253	4.51	0.273824	0.373901	1	5.8573	3951700	0.427243	0.541692	0.562528	0.360011	P48491	Symbols: ATCTIMC, TPI, CYTOTPI | triosephosphate isomerase | chr3:20553794-20556078 FORWARD LENGTH=254	146	446	25.93%	35	137.101	AT3G55440	AT3G55440.1	AT3G55440.1
6.10168	5.2276	5.61644	5.41071	5.3352	4.51	5.64858	5.0853	0.273355	0.215911	1	6.7462	3069600	0.665724	0.432103	0.563273	0.407109	Q1PEP5	Symbols: PARLL1, ATNUC-L2, NUC-L2 | nucleolin like 2 | chr3:6404270-6407822 REVERSE LENGTH=636	125	224	20.00%	27	4.05334	AT3G18610	AT3G18610.1	AT3G18610.1
4.51	5.9302	6.17548	4.51	5.88358	4.51	5.53856	4.96786	0.268721	0.455994	1	8.5357	5758100	0.341041	0.606467	0.570698	0.337253	B9DG17	Symbols: P40, AP40, RP40, RPSAA | 40s ribosomal protein SA | chr1:27243148-27244842 REVERSE LENGTH=294;Symbols: P40, AP40, RP40, RPSAA | 40s ribosomal protein SA | chr1:27243148-27244842 REVERSE LENGTH=298	58	68	47.41%	64	32.682	AT1G72370	AT1G72370.2;AT1G72370.1	AT1G72370.2;AT1G72370.1
6.47012	6.34543	6.32294	4.51	6.41795	6.45712	6.3795	5.79503	0.260333	0.4156	1	24.592	17251000	0.381325	0.559698	0.584471	0.355466	Q42344	Symbols: HMGB4, NFD4, NFD04 | high mobility group B4 | chr2:7642486-7643468 REVERSE LENGTH=134;Symbols: HMGB4, NFD4, NFD04 | high mobility group B4 | chr2:7642486-7643468 REVERSE LENGTH=138;Symbols: HMGB4, NFD4, NFD04 | high mobility group B4 | chr2:764	72	146	38.52%	52	7.46042	AT2G17560	AT2G17560.3;AT2G17560.2;AT2G17560.1	AT2G17560.3;AT2G17560.2;AT2G17560.1
4.51	4.51	6.33592	4.51	4.51	4.51	5.11864	4.51	0.246241	0.373901	1	5.706	7505600	0.427243	0.510298	0.60864	0.378357	Q9FFS5	Symbols: | Disease resistance protein (TIR-NBS-LRR class) family | chr5:16617232-16620785 REVERSE LENGTH=1085	191	473	0.00%	0	0	AT5G41550	AT5G41550.1	AT5G41550.1
6.45971	6.07907	5.98889	4.51	6.05331	6.12001	6.17589	5.56111	0.242782	0.322643	3	19.552	10415000	0.491277	0.4378	0.614784	0.397831	Q9SJL8	Symbols: MAT3 | methionine adenosyltransferase 3 | chr2:15479721-15480893 REVERSE LENGTH=390;Symbols: MAT3 | methionine adenosyltransferase 3 | chr2:15479721-15480893 REVERSE LENGTH=390	88	417;550;559	42.96%	58	594.47	AT2G36880	AT2G36880.2;AT2G36880.1	AT2G36880.2;AT2G36880.1
4.51	4.51	6.35896	4.51	4.51	4.51	5.12632	4.51	0.241924	0.373901	1	5.6933	16440000	0.427243	0.494435	0.616321	0.381311	F4IV00	Symbols: | Phosphatidylinositol N-acetyglucosaminlytransferase subunit P-related | chr2:16464446-16466492 REVERSE LENGTH=464;Symbols: | Phosphatidylinositol N-acetyglucosaminlytransferase subunit P-related | chr2:16464806-16466492 REVERSE LENGTH=464	92	333	0.00%	0	0	AT2G39435	AT2G39435.2;AT2G39435.1	AT2G39435.2;AT2G39435.1
4.51	4.51	6.36681	4.51	4.51	4.51	5.12894	4.51	0.24047	0.373901	1	6.3063	17318000	0.427243	0.478933	0.618938	0.382311	F4IHK9	Symbols: ATGRP7, CCR2 | cold, circadian rhythm, and rna binding 2 | chr2:9265477-9266316 REVERSE LENGTH=159;Symbols: ATGRP7, CCR2, GR-RBP7, GRP7 | cold, circadian rhythm, and rna binding 2 | chr2:9265477-9266316 REVERSE LENGTH=176	76	515	56.30%	76	15.491	AT2G21660	AT2G21660.2;AT2G21660.1	AT2G21660.2;AT2G21660.1
4.51	4.51	6.39698	4.51	4.51	4.51	5.13899	4.51	0.234966	0.373901	1	5.7132	20866000	0.427243	0.461455	0.628994	0.386124	B3H733	Symbols: RLM3 | disease resistance protein (TIR-NBS class), putative | chr4:9561113-9565225 FORWARD LENGTH=637;Symbols: RLM3 | disease resistance protein (TIR-NBS class), putative | chr4:9561113-9565225 FORWARD LENGTH=638;Symbols: RLM3 | disease resista	155	712	0.74%	1	1.43848	AT4G16990	AT4G16990.5;AT4G16990.3;AT4G16990.4;AT4G16990.1;AT4G16990.2	AT4G16990.5;AT4G16990.3;AT4G16990.4;AT4G16990.1;AT4G16990.2
4.51	6.44574	4.51	4.51	4.51	4.51	5.15525	4.51	0.226335	0.373901	1	5.8524	14118000	0.427243	0.427442	0.645248	0.392189	P46422	Symbols: ATGSTF2, ATPM24.1, ATPM24, GST2, GSTF2 | glutathione S-transferase PHI 2 | chr4:1110673-1111531 REVERSE LENGTH=212;Symbols: ATGSTF3, GST16, GSTF3 | glutathione S-transferase F3 | chr2:851348-852106 REVERSE LENGTH=212;Symbols: ATGSTF8, ATGSTF5,	66	651	17.04%	23	7186.24	AT4G02520	AT4G02520.1;AT2G02930.1;AT2G47730.1	AT4G02520.1;AT2G02930.1;AT2G47730.1
6.36093	6.02309	6.16265	5.99333	4.51	6.02181	6.18223	5.50838	0.211912	0.25597	2	11.493	9257600	0.591811	0.333212	0.673845	0.446614	P29197	Symbols: HSP60, HSP60-3B | heat shock protein 60 | chr3:8669013-8672278 FORWARD LENGTH=577;Symbols: HSP60-2 | heat shock protein 60-2 | chr2:14075093-14078568 REVERSE LENGTH=580;Symbols: HSP60-2 | heat shock protein 60-2 | chr2:14075093-14078568 REVERSE	85	151;666	41.48%	56	1677.98	AT3G23990	AT3G23990.1;AT2G33210.2;AT2G33210.1	AT3G23990.1;AT2G33210.2;AT2G33210.1
6.21053	5.95946	6.13107	5.80528	4.51	5.93948	6.10035	5.41826	0.207923	0.213688	1	5.7502	7794900	0.67022	0.316387	0.682098	0.466628	Q9SRT9	Symbols: RGP1, ATRGP1 | reversibly glycosylated polypeptide 1 | chr3:415463-417304 FORWARD LENGTH=357;Symbols: RGP2, ATRGP2 | reversibly glycosylated polypeptide 2 | chr5:5092203-5094093 FORWARD LENGTH=360;Symbols: RGP3, RGP | reversibly glycosylated po	106	711	18.52%	25	16.353	AT3G02230	AT3G02230.1;AT5G15650.1;AT3G08900.1;AT5G50750.1	AT3G02230.1;AT5G15650.1;AT3G08900.1;AT5G50750.1
6.57936	6.46016	6.50482	5.87397	5.68947	5.91952	6.51478	5.82765	0.205528	0.000936879	4	27.581	20371000	3.02832	0.213778	0.687129	0.637141	Q9LQ31	Symbols: | jacalin lectin family protein | chr1:12256990-12260432 FORWARD LENGTH=745;Symbols: | jacalin lectin family protein | chr1:12256990-12260432 FORWARD LENGTH=445	30	182;183;428;600	8.89%	12	1.71042	AT1G33790	AT1G33790.2;AT1G33790.1	AT1G33790.2;AT1G33790.1
4.51	4.51	6.63096	4.51	4.51	4.51	5.21699	4.51	0.196343	0.373901	1	5.7964	27486000	0.427243	0.388211	0.706985	0.414172	Q9FX01	Symbols: AT3BETAHSD/D1, 3BETAHSD/D1 | 3beta-hydroxysteroid-dehydrogenase/decarboxylase isoform 1 | chr1:17336121-17339030 FORWARD LENGTH=382;Symbols: AT3BETAHSD/D1, 3BETAHSD/D1 | 3beta-hydroxysteroid-dehydrogenase/decarboxylase isoform 1 | chr1:17336121-	34	662	0.00%	0	0	AT1G47290	AT1G47290.1;AT1G47290.2	AT1G47290.1;AT1G47290.2
6.70836	4.51	4.51	4.51	4.51	4.51	5.24279	4.51	0.185018	0.373901	3	19.224	5109300	0.427243	0.37	0.732787	0.422895	NA	Symbols: | Ribosomal L5P family protein | chr5:18565281-18566377 REVERSE LENGTH=172;Symbols: | Ribosomal L5P family protein | chr5:18565281-18566496 REVERSE LENGTH=182;Symbols: RPL16B | ribosomal protein L16B | chr4:10302238-10303206 FORWARD LENGTH=18	97	46;278;691	NA	NA	NA	AT5G45775	AT5G45775.1;AT5G45775.2;AT4G18730.1;AT3G58700.1;AT2G42740.1	AT5G45775.1;AT5G45775.2;AT4G18730.1;AT3G58700.1;AT2G42740.1
5.72297	5.79158	6.61027	5.76872	5.62187	4.51	6.04161	5.3002	0.181381	0.204075	22	6.0864	10230000	0.690209	0.290462	0.741408	0.497918	NA	K2C6C_HUMAN | Keratin, type II cytoskeletal 6C (Cytokeratin-6C) (CK-6C) (Cytokeratin-6E) (CK-6E) (Keratin K6h) (Keratin-6C) (K6C) (Type-II keratin Kb12);K2C6B_HUMAN | Keratin, type II cytoskeletal 6B (Cytokeratin-6B) (CK-6B) (Keratin-6B) (K6B) (Type-II k	226	9;27;59;62;126;186;191;192;221;254;257;364;430;431;443;457;465;505;558;683;686;687	NA	NA	NA	P48668;P0	P48668;P04259	P48668;P04259
4.51	4.51	6.73917	4.51	4.51	4.51	5.25306	4.51	0.180694	0.373901	1	5.87	57368000	0.427243	0.348114	0.743056	0.426295	Q9LFK5	Symbols: | Zinc-binding dehydrogenase family protein | chr5:5574537-5575884 REVERSE LENGTH=346	177	449	0.00%	0	0	AT5G16960	AT5G16960.1	AT5G16960.1
6.76989	6.2838	5.87587	5.54282	5.58432	5.47391	6.30985	5.53368	0.167431	0.040716	2	11.628	15937000	1.39023	0.219	0.776165	0.615804	P42760	Symbols: GSTF6 | glutathione S-transferase 6 | chr1:661363-662191 REVERSE LENGTH=208;Symbols: ATGSTF6, GST1, ERD11, ATGSTF3, GSTF6, ATGST1 | glutathione S-transferase 6 | chr1:661363-662191 REVERSE LENGTH=208;Symbols: ATGSTF7, GST11, ATGSTF8, GSTF7, ATG	4	620;652	12.59%	17	839.118	AT1G02930	AT1G02930.2;AT1G02930.1;AT1G02920.1	AT1G02930.2;AT1G02930.1;AT1G02920.1
5.79477	5.74485	5.54817	4.51	5.65403	4.51	5.69593	4.89134	0.156825	0.107239	1	5.6767	3217100	0.969648	0.209913	0.804586	0.57938	Q9SYT0	Symbols: ANNAT1, OXY5, ATOXY5 | annexin 1 | chr1:13225304-13226939 FORWARD LENGTH=317	31	277	20.00%	27	24.7682	AT1G35720	AT1G35720.1	AT1G35720.1
5.88442	5.72543	4.51	4.51	4.51	4.51	5.37328	4.51	0.136999	0.117613	2	5.6776	2314300	0.929544	0.199091	0.863282	0.601978	P17562	Symbols: SAM-2, MAT2, SAM2, AtSAM2 | S-adenosylmethionine synthetase 2 | chr4:796298-797479 REVERSE LENGTH=393;Symbols: SAM-2, MAT2, SAM2, AtSAM2 | S-adenosylmethionine synthetase 2 | chr4:796298-797479 REVERSE LENGTH=393;Symbols: SAM1, SAM-1, MAT1, AtS	1	551;559	28.89%	39	37.196	AT4G01850	AT4G01850.2;AT4G01850.1;AT1G02500.2;AT1G02500.1;AT3G17390.1	AT4G01850.2;AT4G01850.1;AT1G02500.2;AT1G02500.1;AT3G17390.1
4.51	4.51	7.38176	4.51	4.51	4.51	5.46725	4.51	0.110343	0.373901	1	5.6775	203450000	0.427243	0.296296	0.957255	0.48908	Q9FNK2	Symbols: | Leucine Rich Repeat protein family | chr5:7504536-7505838 FORWARD LENGTH=304	183	352	0.00%	0	0	AT5G22590	AT5G22590.1	AT5G22590.1
6.02436	4.51	6.89402	5.505	4.51	4.51	5.80946	4.84167	0.107698	0.277974	13	67.174	13800000	0.555996	0.23584	0.967793	0.54632	NA	K1C13_HUMAN | Keratin, type I cytoskeletal 13 (Cytokeratin-13) (CK-13) (Keratin-13) (K13)	220	32;88;168;179;291;345;351;474;475;526;569;570;692	NA	NA	NA	P13646	P13646	P13646
6.26221	6.5616	6.93162	6.29754	4.51	5.97424	6.58515	5.59393	0.102042	0.164328	22	80.79	28074000	0.784289	0.219368	0.99122	0.626157	NA	K2C6A_HUMAN | Keratin, type II cytoskeletal 6A (Cytokeratin-6A) (CK-6A) (Cytokeratin-6D) (CK-6D) (Keratin-6A) (K6A) (Type-II keratin Kb6) (allergen Hom s 5)	211	9;27;59;62;126;186;191;192;221;254;257;364;430;431;443;457;465;506;558;683;686;687	NA	NA	NA	P02538;P0	P02538;P05787;Q8VED5;H-INV:HIT000292931	P02538
5.52391	5.35465	5.67391	4.51	4.51	4.51	5.51749	4.51	0.0982898	0.000398678	1	5.8157	1758600	3.39938	0.192	1.00749	0.922425	Q9FEF8	Symbols: FIB1, FBR1, ATFIB1, ATFBR1, SKIP7 | fibrillarin 1 | chr5:21294290-21296409 FORWARD LENGTH=273;Symbols: FIB1, FBR1, ATFIB1, ATFBR1, SKIP7 | fibrillarin 1 | chr5:21294290-21296509 FORWARD LENGTH=308;Symbols: FIB2, ATFIB2 | fibrillarin 2 | chr4:13	157	245	51.11%	69	11.2878	AT5G52470	AT5G52470.2;AT5G52470.1;AT4G25630.1	AT5G52470.2;AT5G52470.1;AT4G25630.1
5.9183	5.62692	6.17476	5.59313	4.51	4.51	5.90666	4.87104	0.0921267	0.0583633	1	6.4072	4534900	1.23386	0.198769	1.03561	0.7428	A8MQK3	Symbols: mMDH2 | Lactate/malate dehydrogenase family protein | chr3:5056139-5057865 FORWARD LENGTH=316;Symbols: mMDH2 | Lactate/malate dehydrogenase family protein | chr3:5056139-5057941 FORWARD LENGTH=341;Symbols: mMDH1 | Lactate/malate dehydrogenase f	41	598	18.52%	25	16.046	AT3G15020	AT3G15020.2;AT3G15020.1;AT1G53240.1	AT3G15020.2;AT3G15020.1;AT1G53240.1
5.62953	4.93433	7.28425	5.05507	4.80956	4.85678	5.94937	4.90714	0.0907333	0.211278	11	51.471	28569000	0.675146	0.208571	1.04223	0.612716	NA	K2C4_HUMAN | Keratin, type II cytoskeletal 4 (Cytokeratin-4) (CK-4) (Keratin-4) (K4) (Type-II keratin Kb4)	222	59;187;191;214;466;488;514;516;568;593;688	NA	NA	NA	P19013	P19013	P19013
6.88637	6.42491	6.47413	5.93579	5.77062	4.51	6.59514	5.40547	0.0646151	0.0658596	3	17.886	17865000	1.18138	0.174222	1.18967	0.807407	NA	IGHA1_HUMAN | Ig alpha-1 chain C region	209	483;573;597	NA	NA	NA	P01876;P0	P01876;P01877	P01876
5.60119	5.80234	5.75631	4.51	4.51	4.51	5.71995	4.51	0.0616673	3.7733e-05	1	6.2555	3109300	4.42328	0.241333	1.20994	1.14055	O81346	Symbols: CYP79B2 | cytochrome P450, family 79, subfamily B, polypeptide 2 | chr4:18525311-18527284 FORWARD LENGTH=541	164	367	0.00%	0	0	AT4G39950	AT4G39950.1	AT4G39950.1
6.53685	6.19215	4.51	4.51	4.51	4.51	5.74633	4.51	0.058032	0.119541	4	5.9873	7976300	0.922484	0.177333	1.23633	0.760294	P53494	Symbols: ACT4 | actin 4 | chr5:23950109-23951586 FORWARD LENGTH=377;Symbols: ACT4 | actin 4 | chr5:23950109-23951586 FORWARD LENGTH=377;Symbols: ACT3 | actin 3 | chr3:19915924-19917371 FORWARD LENGTH=377;Symbols: ACT12 | actin-12 | chr3:17128567-171299	91	20;89;157;266	42.96%	58	25.3116	AT5G59370	AT5G59370.2;AT5G59370.1;AT3G53750.1;AT3G46520.1;AT2G37620.2;AT2G37620.1	AT5G59370.2;AT5G59370.1;AT3G53750.1;AT3G46520.1;AT2G37620.2;AT2G37620.1
6.23754	6.65249	6.32127	6.32077	4.51	4.51	6.40377	5.11359	0.0512653	0.104603	2	41.508	22563000	0.980455	0.1568	1.29018	0.79801	A8MQA1	Symbols: ATBBC1, BBC1, RSU2 | breast basic conserved 1 | chr3:18166971-18168047 REVERSE LENGTH=204;Symbols: ATBBC1, BBC1, RSU2 | breast basic conserved 1 | chr3:18166971-18168047 REVERSE LENGTH=206;Symbols: ATBBC1, BBC1, RSU2 | breast basic conserved 1	138	524;621	51.11%	69	15.0682	AT3G49010	AT3G49010.4;AT3G49010.3;AT3G49010.2;AT3G49010.1;AT3G49010.5;AT5G23900.1	AT3G49010.4;AT3G49010.3;AT3G49010.2;AT3G49010.1;AT3G49010.5;AT5G23900.1
6.46124	4.51	6.52611	4.51	4.51	4.51	5.83245	4.51	0.0475938	0.116223	1	8.5858	8021600	0.934709	0.152	1.32245	0.795942	O64777	Symbols: | S-locus lectin protein kinase family protein | chr1:22664669-22667769 REVERSE LENGTH=806;Symbols: | S-locus lectin protein kinase family protein | chr1:22654638-22657774 REVERSE LENGTH=819	49	496	0.00%	0	0	AT1G61430	AT1G61430.1;AT1G61400.1	AT1G61430.1;AT1G61400.1
6.25554	6.48302	6.3609	4.51	4.51	4.51	6.36648	4.51	0.0139161	9.34838e-06	6	5.8253	14074000	5.02926	0	1.85648	1.74199	NA	K1C15_SHEEP | Keratin, type I cytoskeletal 15 (Cytokeratin-15) (CK-15) (Keratin-15) (K15)	202	32;334;474;475;493;650	NA	NA	NA	O77727	O77727	O77727

## Sheet: Peptide IDs
	Sequence	Proteins	id
	AAELTNLFESR	ATMG01190.1;AT2G07698.1	0
	AAQEALYVR	AT3G52930.1	1
	AASFNIIPSSTGAAK	AT1G13440.2;AT1G13440.1;AT3G04120.1	2
	AATYDEIK	AT1G13440.2;AT1G13440.1;AT3G04120.1	3
	AATYDEIKK	AT1G13440.2;AT1G13440.1;AT3G04120.1	4
	AAVETACPR	AT3G32980.1	5
	ADGYILEGK	AT5G59240.1;AT5G20290.1	6
	ADLEMQIESLTEELAYLK	P13645	7
	AEAESLYQSK	P04264	8
	AEAESWYQTK	P02538;Q8VED5;P48668;P04259	9
	AEEIFEK	AT4G13940.4;AT4G13940.3;AT4G13940.1;AT4G13940.2	10
	AEFAEVSK	P02768	11
	AEKPEVR	AT3G53020.1;AT2G36620.1	12
	AEYDEAGPGIVHR	AT3G18780.2;AT1G49240.1	13
	AFADASMNTAYEK	AT1G65930.1	14
	AFLVEEQK	AT1G69620.1;AT1G26880.1;AT3G28900.1	15
	AFQSSYYDR	AT2G37170.1	16
	AFQSSYYTR	AT3G53420.2;AT3G53420.1;AT5G60660.1	17
	AGALGDSVSITR	AT5G27770.1	18
	AGALGDSVTITR	AT3G05560.3;AT3G05560.2;AT3G05560.1	19
	AGFAGDDAPR	AT3G18780.2;AT1G49240.1;AT3G18780.1;AT3G12110.1;AT2G42100.1;AT5G59370.2;AT5G59370.1;AT3G53750.1;AT3G46520.1;AT2G37620.2;AT2G37620.1;AT5G09810.1	20
	AGNLYINPK	AT1G47278.1;AT1G47278.2	21
	AGQAAFGNMCR	AT3G09630.1;AT3G09630.2;AT5G02870.1;AT5G02870.2	22
	AGQTVVGPIHGVSGK	AT2G25980.1	23
	AGQVECYEYGDK	AT5G35940.1	24
	AGSEGIQFIK	AT5G35940.1	25
	AGTDSIISAR	AT4G39730.1;AT2G22170.1	26
	AIGGGLSSVGGGSSTIK	P02538;P48668	27
	AIKEEIK	AT5G17920.2;AT5G17920.1;AT3G03780.3;AT3G03780.2;AT3G03780.1	28
	AIKEEIKK	AT5G17920.2;AT5G17920.1;AT3G03780.3;AT3G03780.2;AT3G03780.1	29
	AIKEESEGK	AT1G13440.2;AT1G13440.1;AT3G04120.1	30
	AKDVEGPEGFQTR	AT2G37170.1	31
	ALEEANADLEVK	P02533;P08779;P13646;O77727	32
	ALEESNYELEGK	P13645;P02535	33
	ALELVEEMR	AT3G03340.1;AT5G17440.1	34
	ALGQISER	AT1G04410.1	35
	ALGSIGAGTTPGR	AT2G43030.1	36
	ALIEAMEK	AT4G27090.1	37
	ALMVNAK	AT5G35940.1	38
	ALQQSTLK	AT3G52930.1;AT2G36460.1;AT2G36460.2;AT4G26530.2;AT4G26530.1;AT5G03690.2;AT5G03690.1	39
	ALSTSKPDPVVEDQA	AT2G41840.1	40
	ALVDAPDMER	AT4G27090.1;AT2G20450.1	41
	ALVGLHGR	AT2G25980.1	42
	ALVMHTYK	AT1G57720.2;AT1G57720.1	43
	AMIGQVAGGGR	AT4G36130.1;AT2G18020.1;AT3G51190.1	44
	AMLEVDDQQQNVTSQR	AT1G31440.1	45
	AMQLLESGLK	AT5G45775.1;AT5G45775.2;AT4G18730.1;AT3G58700.1;AT2G42740.1	46
	ANGETISTK	AT1G09690.1;AT1G09590.1	47
	ANLNDFDR	AT4G27090.1	48
	ANSDAADYQK	AT4G31700.2;AT5G10360.1	49
	ANSEATLGTYK	AT3G52930.1	50
	APLGQNTVLLR	AT5G27850.1;AT3G05590.1	51
	APQVYTIPPPK	P01868;P01869	52
	APQVYTIPPPKEQMAK	P01868;P01869	53
	APSTYGGGLSVSSR	P08779	54
	APSTYGGGLSVSSSR	P02533	55
	AQEREQIK	P35908;Q01546	56
	AQKVEAQGGK	AT3G16420.3;AT3G16420.2;AT3G16420.1	57
	AQYEEIANR	P13647	58
	AQYEEIAQR	P35908;P02538;P48668;P04259;P19013	59
	ASHIVGYPR	AT5G17920.2;AT5G17920.1;AT3G03780.3;AT3G03780.2;AT3G03780.1	60
	ASKPVLGSDHGK	AT3G16470.2;AT3G16470.1;AT3G16470.3	61
	ASTSTTIR	P02538;P48668;P04259	62
	ATAGDTHLGGEDFDNR	AT5G02490.1;AT3G12580.1;AT1G56410.1;AT1G16030.1;AT5G02500.1;AT3G09440.2;AT3G09440.1;AT5G02500.2	63
	ATAYQPMKPGK	AT5G62300.2;AT5G62300.1;AT3G45030.1	64
	ATDVMIAGK	AT4G13940.4;AT4G13940.3;AT4G13940.1;AT4G13940.2;AT3G23810.1	65
	ATFDCLQK	AT2G41840.1;AT3G57490.1;AT1G59359.1;AT1G58983.1;AT1G58684.1;AT1G58380.1	66
	ATMQNLNDR	Q04695;Q9QWL7;Q9C075;Q99PS0	67
	ATNGSASSAQLSQK	AT1G72370.2;AT1G72370.1	68
	ATNYNAGDR	P61626	69
	ATTTTEATK	AT4G34050.2;AT4G34050.1	70
	AVAGAGVLSGYDK	AT3G08580.2;AT3G08580.1	71
	AVENSPFLEK	AT5G56030.1;AT5G56010.1;AT5G56000.1;AT5G56030.2	72
	AVFVDLEPTVIDEVR	AT4G14960.1;AT5G19780.1;AT5G19770.1;AT4G14960.2;AT1G50010.1;AT1G04820.1	73
	AVGIWGCK	AT3G60245.1	74
	AVNEYKEAK	AT5G17920.2;AT5G17920.1;AT3G03780.3;AT3G03780.2;AT3G03780.1	75
	AYGGVLSGSAVR	AT1G69620.1;AT1G26880.1;AT1G26880.2	76
	CATITPDEGR	AT1G65930.1;AT5G14590.1	77
	CCTESLVNR	P02768;P02769	78
	CELAAAMK	P00698	79
	CELAAAMKR	P00698	80
	CGLTYVYQK	AT3G62250.1;AT2G47110.2;AT2G47110.1	81
	CMEPVEK	AT5G02490.1;AT3G12580.1;AT5G02500.1;AT3G09440.2;AT3G09440.1;AT5G02500.2	82
	CNNDNGDVAVDFFHR	AT3G09260.1	83
	CSACAYPAAR	AT1G52300.1	84
	CSSYVNAK	AT3G09260.1	85
	DAAQEAVK	AT3G53020.1;AT2G36620.1	86
	DADSFDLRK	AT3G01510.1	87
	DAEEWFHAK	P13646	88
	DAYVGDEAQSK	AT3G18780.2;AT1G49240.1;AT3G18780.1;AT3G12110.1;AT5G59370.2;AT5G59370.1;AT3G53750.1;AT3G46520.1;AT2G37620.2;AT2G37620.1;AT5G09810.1	89
	DDEVQIVR	AT3G49910.1	90
	DDPEVQFSWFVDDVEVHTAQTQPR	P01868;P01869	91
	DFESLGSDGR	AT1G51510.1	92
	DFLAQGVR	AT1G66270.2;AT1G66270.1	93
	DFLAQGVRPSALK	AT1G66270.2;AT1G66270.1	94
	DFLGQGVR	AT1G66280.1	95
	DFLGQGVRPSALK	AT1G66280.1	96
	DFLSQGVR	AT3G09260.1	97
	DFLSQGVRPSALK	AT3G09260.1	98
	DGAGDVAFIR	P02788	99
	DGEIEDQLDSKPK	AT4G36690.2;AT4G36690.4;AT4G36690.3;AT4G36690.1	100
	DGEYEPAEKPDPDTDYMR	AT3G15730.1	101
	DGGSDYLGK	AT2G36530.1	102
	DIVALSGAHTLGR	AT1G07890.6;AT1G07890.8;AT1G07890.7;AT1G07890.5;AT1G07890.4;AT1G07890.3;AT1G07890.2;AT1G07890.1;AT4G08390.4;AT4G08390.3;AT4G08390.2;AT4G08390.1	103
	DIVGHRLPK	AT3G09260.1;AT5G28510.1	104
	DKDSVEVGTADYNR	AT1G66280.1	105
	DKDSVEVGTADYNRK	AT1G66280.1	106
	DLAELIAAGR	AT2G27710.4;AT2G27720.1;AT2G27710.3;AT2G27710.2;AT2G27710.1;AT2G27720.3;AT2G27720.2	107
	DLDQVAGR	AT5G61170.1;AT5G15520.1;AT3G02080.1	108
	DLNTDAFR	AT1G52400.2;AT1G52400.3;AT1G52400.1	109
	DLTDSLMK	AT5G09810.1	110
	DLTDYLMK	AT3G18780.2;AT1G49240.1;AT3G18780.1;AT3G12110.1	111
	DMSQADFGR	AT4G13940.4;AT4G13940.3;AT4G13940.1;AT3G23810.1	112
	DQYEQMAEK	P08779;Q3ZAW8;Q9Z2K1	113
	DRNLYELR	AT3G05560.3;AT3G05560.2;AT3G05560.1;AT5G27770.1	114
	DRPPSSYSLK	AT3G20370.1	115
	DRPVTLSK	AT1G25260.1	116
	DRTSPTYGR	AT2G25980.1	117
	DSEIAMGGYQPHHLSHR	AT3G15730.1	118
	DSHGIPQVK	AT4G00100.1;AT3G60770.1	119
	DSNDAPTVSR	AT1G66270.2;AT1G66270.1	120
	DSNDVPTVSR	AT1G66280.1	121
	DSQDVEGGEHGKK	AT3G16450.3;AT3G16450.2;AT3G16450.1	122
	DSTYSMSSTLTLTK	P01837	123
	DSVEVGTADYNR	AT1G66280.1	124
	DSVEVGTADYNRK	AT1G66280.1	125
	DVDAAYMNK	P02538;P13647;P48668;P04259	126
	DVDGAYMTK	P04264	127
	DVDNAYMIK	P35908	128
	DVEAVPGEGFQTR	AT3G53420.2;AT3G53420.1	129
	DVILIATR	AT1G48830.2;AT1G48830.1	130
	DVIQALR	AT3G15730.1	131
	DVLPDALSDSNR	AT3G03640.1	132
	DVNAAVGTIK	AT4G14960.1;AT5G19780.1;AT5G19770.1;AT4G14960.2;AT1G50010.1;AT1G04820.1	133
	DYQELMNTK	P04264	134
	DYQELMNVK	P35908;Q01546	135
	EAIDGAYVDKK	AT3G48930.1	136
	EAPQGEKPEPVR	AT1G04270.2;AT1G04270.1	137
	EASALDLQNR	AT5G16780.1	138
	ECCHGDLLECADDR	P02769	139
	EDAANNFAR	AT4G14960.1;AT5G19780.1;AT5G19770.1;AT4G14960.2;AT1G50010.1;AT1G04820.1;AT1G64740.1	140
	EDGNILGHK	P42212;PSB_N_GFP;PSB_C_GFP;Q9U6Y5;PSB_N_GS_yellow;PSB_N_GS_green;PSB_C_GS_green;PSB_C_GS_yellow	141
	EDIQLMK	AT1G66280.1;AT3G21370.1;AT3G09260.1;AT5G28510.1;AT1G66270.2;AT1G66270.1;AT1G52400.2;AT1G52400.3;AT1G52400.1	142
	EEAEALYHSK	P35908	143
	EEMSSVLR	AT3G53740.1;AT5G02450.1;AT3G53740.4;AT3G53740.3;AT3G53740.2;AT2G37600.2;AT2G37600.1	144
	EFEAATNAK	AT3G15950.2;AT3G15950.1	145
	EFNLANPNNK	AT2G17560.3;AT2G17560.2;AT2G17560.1	146
	EGDGTRRR	AT1G51130.1	147
	EGLTTQEGEDR	AT2G18960.1;AT4G30190.1;AT4G30190.2	148
	EGNEDEEEEVNGGNK	AT1G28060.1	149
	EGPLAEENMR	AT3G12915.2;AT3G12915.1;AT1G56070.1	150
	EGVITIQDGK	AT3G23990.1;AT2G33210.2;AT2G33210.1	151
	EGYKITGFHGR	AT3G16460.2;AT3G16460.1	152
	EHILLAR	AT4G02930.1	153
	EIAQDFK	AT5G65360.1;AT5G10980.1;AT5G10400.1;AT5G10390.1;AT4G40040.2;AT4G40040.1;AT4G40030.3;AT4G40030.1;AT3G27360.1;AT1G13370.1;AT1G09200.1;AT1G19890.1;AT5G65350.1;AT4G40030.2	154
	EIFGNFGEVIHVEIAMDR	AT1G16610.2;AT1G16610.1;AT1G16610.3	155
	EIKDILVR	AT5G18380.3;AT5G18380.2;AT5G18380.1;AT2G09990.1	156
	EITALAPSSMK	AT3G18780.2;AT1G49240.1;AT3G18780.1;AT3G12110.1;AT5G59370.2;AT5G59370.1;AT3G53750.1;AT3G46520.1;AT2G37620.2;AT2G37620.1;AT5G09810.1	157
	EKGVSQAGVK	AT1G66280.1	158
	EKTLSDQFEAK	AT4G02230.1;AT1G02780.1	159
	ELAEDGYSGVEVR	AT5G35530.1;AT2G31610.1;AT3G53870.1	160
	ELAQQIEK	AT3G13920.3;AT3G13920.4;AT1G54270.2;AT3G13920.1;AT1G54270.1;AT1G72730.1;AT3G13920.2	161
	ELEFYMK	AT5G59240.1;AT5G20290.1	162
	ELESICNPIIAK	AT5G02500.1;AT3G09440.2;AT3G09440.1;AT5G02500.2	163
	ELRDERPSSK	AT5G26260.1	164
	ELSEIAEQAK	AT2G18960.1;AT4G30190.1;AT4G30190.2	165
	ELVVYPADEPMR	AT1G54010.1	166
	EMIESGVIK	AT5G08690.1;AT5G08670.1;AT5G08680.1	167
	EQYEAMAER	P13646	168
	ESGKYYK	AT3G09260.1	169
	ESHKITGFHGK	AT5G35940.1	170
	ESTLHLVLR	AT3G62250.1;AT2G47110.2;AT2G47110.1;AT1G23410.1;AT3G52590.1;AT2G36170.1;AT4G05050.4;AT2G35635.1;AT1G31340.1;AT4G05050.3;AT4G05050.2;AT4G05050.1;AT4G02890.2;AT4G02890.1;AT1G55060.1;AT4G05320.5;AT4G02890.4;AT4G02890.3;AT5G03240.3;AT5G03240.2;AT5G03240.1;AT1G65350.1;AT5G37640.1;AT4G05320.6;AT4G05320.3;AT4G05320.1;AT5G20620.1;AT4G05320.4;AT4G05320.2;AT3G09790.1;P62979	171
	EVAELSGGSER	AT5G53440.1	172
	EVAGQAPYEK	AT3G53740.1;AT5G02450.1;AT3G53740.4;AT3G53740.3;AT3G53740.2	173
	EVASNSELVQSSR	P08779	174
	EVATNSELVQSGK	Q04695;Q9QWL7;P02533	175
	EVEGEEAEEK	AT3G57150.1	176
	EVFTSSSSSSSR	P08779	177
	EVSSYLKK	AT5G60390.2;AT5G60390.3;AT5G60390.1;AT1G07940.2;AT1G07940.1;AT1G07930.1;AT1G07920.1;AT1G07930.2	178
	EVSTNTAMIQTSK	P13646	179
	EYADYVFTEYGGK	AT1G66280.1;AT1G66270.2;AT1G66270.1	180
	EYAEKDNELIR	AT2G44120.1;AT2G44120.2	181
	EYGGNVGR	AT1G33790.2;AT1G33790.1	182
	EYGSNVGR	AT1G33790.2	183
	EYIDAAVR	AT5G35530.1;AT2G31610.1	184
	EYQELMNTK	P13647	185
	EYQELMNVK	P02538;P05787;H-INV:HIT000292931;P48668;P04259	186
	EYQELMSVK	P19013	187
	EYTINLHR	AT5G56710.2;AT5G56710.1;AT4G26230.1;AT2G19740.1	188
	FAEDFKK	AT1G31440.1	189
	FAGVNMR	AT5G18380.3;AT5G18380.2;AT5G18380.1;AT2G09990.1	190
	FASFIDK	P35908;Q01546;Q7Z794;Q9DCV7;P02538;P05787;Q8VED5;P13647;P48668;P04259;P19013	191
	FASFIDKVR	P35908;Q01546;Q7Z794;Q9DCV7;P02538;P05787;Q8VED5;P13647;P48668;P04259	192
	FDNLYGCR	AT4G13940.4;AT4G13940.3;AT4G13940.1;AT4G13940.2;AT3G23810.1	193
	FDYEKDGK	AT3G16470.2;AT3G16470.1;AT3G16470.3;AT1G52000.1	194
	FEGDTLVNR	P42212;PSB_N_GFP;PSB_C_GFP;Q9U6Y5;PSB_N_GS_yellow;PSB_N_GS_green;PSB_C_GS_green;PSB_C_GS_yellow	195
	FEMEQNLR	P35527	196
	FESNFNTQATNR	P00698	197
	FGVHVAPITK	AT3G16460.2;AT3G16460.1	198
	FICTTGK	P42212;PSB_N_GFP;PSB_C_GFP;Q9U6Y5;PSB_N_GS_yellow;PSB_N_GS_green;PSB_C_GS_green;PSB_C_GS_yellow	199
	FKVEMNAR	AT1G28060.1	200
	FLEQQNQVLQTK	P35908;Q7Z794;P04264	201
	FQTSLEK	AT1G43170.4;AT1G43170.9;AT1G43170.8;AT1G43170.7;AT1G43170.6;AT1G43170.5;AT1G43170.3;AT1G43170.2;AT1G43170.1	202
	FSDSSVQSDMK	AT5G02500.1;AT5G02500.2	203
	FSGSESSNAVVVHPR	AT1G66150.1	204
	FSNSSSSNEFSK	Q5D862	205
	FSSSSGYGGGSSR	P35527	206
	FSTLEDK	AT5G26260.1;AT5G26280.1;AT5G26280.2	207
	FSTSVTDLTNVNAMGAPDINPGDILAVPLLACSSNFPK	AT1G77630.1	208
	FTLEISGNK	AT2G25980.1	209
	FTLQVQDK	AT3G16460.2;AT3G16460.1	210
	FTLQVQDKK	AT3G16460.2;AT3G16460.1	211
	FVADGVFYAELNEVLTR	AT5G35530.1;AT2G31610.1;AT3G53870.1	212
	FVYDKSPEEVTGEEHGK	AT3G16420.3;AT3G16420.2;AT3G16420.1;AT3G16430.2;AT3G16430.1	213
	GAFSSVSMSGGAGR	P19013	214
	GANLWDDGSTHDAVTK	AT3G16420.3;AT3G16420.2;AT3G16420.1	215
	GDSVVLMGK	AT2G40010.1;AT3G09200.1;AT3G11250.1	216
	GEEFDGSEAVR	AT3G19820.3;AT3G19820.2;AT3G19820.1	217
	GEELFTGVVPILVELDGDVNGHKFSVSGEGEGDATYGK	P42212;PSB_N_GFP;PSB_C_GFP;Q9U6Y5;PSB_N_GS_yellow;PSB_N_GS_green;PSB_C_GS_green;PSB_C_GS_yellow	218
	GEHALKDAR	P35908	219
	GELALKDAR	P13647	220
	GEMALKDAK	P02538;P48668;P04259	221
	GENALKDAK	P04264	222
	GESSVTGPVVR	AT1G21750.2;AT1G21750.1	223
	GFAYIDLTSGFDEALQLSGSEIGGGNIHVEESRPR	AT3G18610.1	224
	GFSSGSAVVSGGSR	P35908	225
	GGAGLEVVQGK	AT3G16390.1;AT3G16400.2;AT3G16400.1;AT3G16410.1;AT2G33070.2;AT2G33070.1;AT2G33070.3	226
	GGDVWDDGGAYDNVK	AT3G16470.2;AT3G16470.1	227
	GGEEWDDGGAYENVK	AT3G16470.2;AT3G16470.1;AT3G16470.3	228
	GGLEGIQFIK	AT2G25980.1;AT1G52100.2;AT1G52100.1;AT5G35950.1	229
	GGNQWDDGADHENVTK	AT2G25980.1	230
	GGSGGSHGGGSGFGGESGGSYGGGEEASGSGGGYGGGSGK	P35527	231
	GGSGGSYGGGGSGGGYGGGSGSR	P35527	232
	GGSISGGGYGSGGGK	P35908	233
	GGSSSGGGYGSGGGGSSSVK	P35908	234
	GHAVGDIPGVR	AT5G02960.1;AT3G09680.1	235
	GHSNVWNSHPK	AT4G33865.1;AT3G44010.1;AT3G43980.1	236
	GHVESVAK	AT2G18960.1	237
	GHVKPIR	AT3G56340.1	238
	GIDLIAGGK	AT5G27850.1;AT3G05590.1	239
	GIGDCFGR	AT3G08580.2;AT3G08580.1	240
	GILAADESTGSIAK	P00883	241
	GILAADESTGTIGK	AT3G52930.1;AT2G36460.1;AT4G26530.2;AT4G26530.1;AT5G03690.2;AT5G03690.1	242
	GIQAQLEK	AT1G43170.4;AT1G43170.9;AT1G43170.8;AT1G43170.7;AT1G43170.6;AT1G43170.5;AT1G43170.3;AT1G43170.2;AT1G43170.1	243
	GKDSLAAQGK	AT4G14320.1;AT3G23390.1;AT4G14320.2	244
	GKEDALVTK	AT5G52470.2;AT5G52470.1;AT4G25630.1	245
	GLDVDALFISHIQVNQAAK	AT1G67430.1;AT1G27400.1	246
	GLDVIQQAQSGTGK	AT3G13920.3;AT3G13920.4;AT1G54270.2;AT3G13920.1;AT1G54270.1;AT1G72730.1;AT3G13920.2	247
	GLEGFIATGTK	AT1G31440.1	248
	GLNEGGDNVDAASSGK	AT5G16780.1	249
	GNAIVGFHGR	AT5G35940.1	250
	GNTANVIR	AT3G08580.2;AT3G08580.1;AT4G28390.1;AT5G13490.2;AT5G13490.1	251
	GPYESGSGHSSGLGHQESR	Q86YZ3	252
	GPYESGSGHSSGLGHR	Q86YZ3	253
	GRLDSELR	P02538;P13647;P48668;P04259	254
	GSCGIGGGIGGGSSR	P02533;P08779	255
	GSDVHCILCPR	AT3G15730.1	256
	GSGGLGGACGGAGFGSR	P02538;P48668;P04259	257
	GSGSGQSPSYGR	Q86YZ3	258
	GSLGGGFSSGGFSGGSFSR	P13645	259
	GSSNSYAIK	AT3G11940.2;AT3G11940.1;AT2G37270.2;AT2G37270.1	260
	GSSSGGGYSSGSSSYGSGGR	P35908	261
	GVSDLPGLTDTEKPR	AT5G10360.1	262
	GVTLMPNVGYGSDK	AT5G46430.2;AT5G46430.1;AT4G18100.1	263
	GYEGVVTR	AT1G43170.4;AT1G43170.9;AT1G43170.8;AT1G43170.7;AT1G43170.6;AT1G43170.5;AT1G43170.3;AT1G43170.2;AT1G43170.1;AT1G61580.1	264
	GYMFTTTAER	AT3G18780.2;AT1G49240.1;AT3G18780.1;AT5G09810.1	265
	GYSFTTTAER	AT5G59370.2;AT5G59370.1;AT3G53750.1;AT3G46520.1;AT2G37620.2;AT2G37620.1	266
	GYVASNSKDDPAK	AT5G60390.2;AT5G60390.3;AT5G60390.1;AT1G07940.2;AT1G07940.1;AT1G07930.1;AT1G07920.1	267
	HEISEMNR	P13647	268
	HFEIGGDK	AT4G14320.1;AT3G23390.1	269
	HGGGGGGFGGGGFGSR	P35908	270
	HGLDNYR	P00698	271
	HGNSHQGEPR	P13645	272
	HGVQELEIELQSQLSK	P35527	273
	HLTGEFEK	AT5G55190.1;AT5G20020.1;AT5G20010.1	274
	HNSYTCEATHK	P01837	275
	HSGKDYDDGDEK	AT3G29075.1	276
	HYNDEDVIR	AT1G35720.1	277
	IACYVTVR	AT5G45775.1;AT5G45775.2;AT4G18730.1;AT3G58700.1;AT2G42740.1	278
	IEEEASTLK	AT2G47470.3;AT2G47470.1	279
	IEETETLPR	AT5G26260.1	280
	IEISELNR	P35908;P04264	281
	IESDYVKPSYGGHEDDGDDGHKK	AT3G29075.1	282
	IGDMEGAAAIQR	AT5G53800.1	283
	IGGIGTVPVGR	AT5G60390.2;AT5G60390.3;AT5G60390.1;AT1G07940.2;AT1G07940.1;AT1G07930.1;AT1G07920.1;AT1G07930.2	284
	IGINGFGR	AT1G13440.2;AT1G13440.1;AT3G04120.1	285
	IGLFGGAGVGK	AT5G08690.1;AT5G08670.1;AT5G08680.1;ATCG00480.1	286
	IKEWYEK	P13645;P02535	287
	IKFEMEQNLR	P35527	288
	IKNPAYK	AT1G56340.2;AT1G56340.1	289
	ILDAKLNQVGEDLEGVTHKVYFDIQINGSPAGR	AT3G55920.1	290
	ILTATIENNR	P13646	291
	IMEIASLEK	AT3G05560.3;AT3G05560.2;AT3G05560.1;AT5G27770.1	292
	IMNVLGEPIDER	AT5G08690.1;AT5G08670.1;AT5G08680.1	293
	IMTELEK	AT5G17270.1	294
	IPSSEEIADR	AT5G17920.2;AT5G17920.1	295
	IQDKEGIPPDQQR	AT3G62250.1;AT2G47110.2;AT2G47110.1;AT1G23410.1;AT3G52590.1;AT2G36170.1;AT4G05050.4;AT2G35635.1;AT1G31340.1;AT4G05050.3;AT4G05050.2;AT4G05050.1;AT4G02890.2;AT4G02890.1;AT1G55060.1;AT4G05320.5;AT4G02890.4;AT4G02890.3;AT5G03240.3;AT5G03240.2;AT5G03240.1;AT1G65350.1;AT5G37640.1;AT4G05320.6;AT4G05320.3;AT4G05320.1;AT5G20620.1;AT4G05320.4;AT4G05320.2;P62979	296
	ISGLIYEETR	AT1G07660.2;AT5G59970.1;AT5G59690.1;AT3G53730.1;AT3G46320.1;AT3G45930.1;AT2G28740.1;AT1G07820.2;AT1G07820.1;AT1G07660.1	297
	ISISTSGGSFR	P13647	298
	ISSVLAGGSCR	P02533;P08779	299
	ITGFHGSADANLK	AT2G25980.1	300
	ITITNDK	AT5G02490.1;AT3G12580.1;AT1G56410.1;AT5G02500.1;AT3G09440.2;AT3G09440.1	301
	ITITNDKGR	AT5G02490.1;AT3G12580.1;AT1G56410.1;AT5G02500.1;AT3G09440.2;AT3G09440.1	302
	ITITNEK	AT5G42020.1;AT5G28540.1	303
	ITVTADGQFSK	AT3G05560.3;AT3G05560.2;AT3G05560.1;AT5G27770.1	304
	IVMELYTDK	AT4G38740.1;AT2G21130.1	305
	IVSHEHGK	AT3G16470.2;AT3G16470.1;AT3G16470.3	306
	IVSLEHGK	AT3G16470.2;AT3G16470.1	307
	IVVVDSEMPSR	AT3G15730.1	308
	IYASYGGEGIQYVK	AT3G16460.2;AT3G16460.1	309
	IYVGQGENGIASVK	AT2G25980.1	310
	KAVGIWGCK	AT3G60245.1	311
	KDDEVQIVR	AT3G49910.1	312
	KDVDGAYMTK	P04264	313
	KEEVITR	AT5G56710.2;AT5G56710.1	314
	KGENDLPGLTDTEKPR	AT4G31700.2	315
	KGHAVGDIPGVR	AT5G02960.1;AT3G09680.1	316
	KGPAAIQK	P35527	317
	KLEAQGGR	AT3G16470.2;AT3G16470.1;AT3G16470.3	318
	KLEIDDDQK	AT5G10360.1	319
	KLEIDDDQKLR	AT5G10360.1	320
	KMEVSQHSK	AT3G60245.1	321
	KPFAGSSHAK	AT5G02960.1	322
	KQGVLTPGR	AT4G31700.2	323
	KREDPVYLEK	AT1G73960.2;AT1G73960.1	324
	KREEMSSVLR	AT3G53740.1;AT5G02450.1;AT3G53740.4;AT3G53740.3;AT3G53740.2;AT2G37600.2;AT2G37600.1	325
	KTESEHGSGYGGR	AT3G29075.1	326
	KTLERGEK	AT5G22800.1	327
	KVEFASK	AT3G53020.1	328
	KVYVGQGQDGVAAVK	AT3G16460.2;AT3G16460.1	329
	KYEDEINK	P35908;Q01546	330
	KYEDEINKR	P35908;Q01546	331
	KYLSVTDGTVK	AT5G26260.1	332
	KYYTETSWK	AT2G39435.2;AT2G39435.1	333
	LAADDFR	P13645;P02535;Q148H6;P05784;Q7Z3Y7;Q2M2I5;P02534;Q14525;Q61765;Q15323;Q92764;Q14532;O76014;Q497I4;O76015;O76013;Q04695;Q9QWL7;P08727;P19001;P02533;P08779;Q3ZAW8;Q9Z2K1;O77727	334
	LAADTPLLTGQR	AT1G78900.2;AT1G78900.1	335
	LAATCATAVESR	AT3G14990.3;AT3G14990.2;AT3G14990.1	336
	LADDTQGTVEAAK	AT5G13420.1	337
	LAEQFQK	AT1G73230.1;AT1G17880.1	338
	LAISSIPR		339
	LALDLEIATYR	P04264	340
	LAPGGHLGR	AT3G09630.1;AT3G09630.2;AT5G02870.1;AT5G02870.2	341
	LASIGLDNTEDNR	AT2G01140.1	342
	LASYLDK	P13645;P05784;Q04695;Q9QWL7;P08727;P19001;P35527;P02533;P08779	343
	LASYLDKVR	P13645;Q04695;Q9QWL7;P08727;P19001;P02533;P08779	344
	LAVDDFR	P13646	345
	LAVLQFYK	AT3G62250.1;AT2G47110.2;AT2G47110.1;AT1G23410.1	346
	LDELRDEGK	P02768	347
	LDEVGAIR	AT5G12230.1	348
	LEAACVGTVESGK	AT1G65930.1	349
	LENEIQTYR	P13645;P02535	350
	LEQEIATYR	Q04695;Q9QWL7;P08727;P19001;Q61782;Q8N1A0;P35900;Q9D312;P02533;P08779;Q3ZAW8;Q9Z2K1;P13646	351
	LESISLPR	AT5G22590.1	352
	LFVHNGK	AT5G26280.1;AT5G26280.2	353
	LGMDGYR	P61626	354
	LGNVYTIGK	AT5G07090.2;AT2G17360.1;AT5G58420.1;AT5G07090.1	355
	LGSVKLPR	AT3G56920.1	356
	LGTTDSVDVGTADHNR	AT1G66270.2;AT1G66270.1	357
	LGTTDSVDVGTADHNRK	AT1G66270.2;AT1G66270.1	358
	LGVNVAPIAK	AT3G16470.2;AT3G16470.1;AT3G16470.3	359
	LILVESR	AT4G00100.1;AT3G60770.1	360
	LKDKDSVEVGTADYNR	AT1G66280.1	361
	LKSMSSSQK	AT5G17360.1	362
	LKYENEVALR	P13645	363
	LLEGEECR	P35908;Q01546;Q8N1N4;P02538;P13647;P48668;P04259	364
	LLTPVEEGPTPR	AT3G16390.1;AT3G16400.2;AT3G16400.1;AT3G16410.1	365
	LMEVGLEKR	AT1G22980.1	366
	LMTDPNKKK	AT4G39950.1	367
	LNMDAFR	AT3G03640.1	368
	LPADSDEYLQR	AT1G65950.1	369
	LPLQDVYK	AT5G60390.2;AT5G60390.3;AT5G60390.1;AT1G07940.2;AT1G07940.1;AT1G07930.1;AT1G07920.1;AT1G07930.2	370
	LPQFTAAQK	AT1G66270.2;AT1G66270.1	371
	LPTDDGLTAQMR	AT1G26630.1	372
	LPVPDKR	AT1G74010.1	373
	LQDLYSSTK	AT1G31440.1	374
	LQGEIAHVK	P35908	375
	LQSTLKR	AT1G73230.1;AT1G17880.1	376
	LRAEIDNVK	P13647	377
	LRDDLER	AT4G09800.1;AT1G34030.1;AT1G22780.1	378
	LRSEIDNVK	P04264	379
	LRSEIDNVKK	P04264	380
	LSCKMGYPVR	AT5G39550.1;AT1G66040.1;AT1G66050.1	381
	LSIAWSR	AT1G66280.1;AT1G47600.2;AT1G51470.1;AT1G47600.1;AT1G66270.2;AT1G66270.1	382
	LSIEAMVCREVTNFLR	AT3G33494.1	383
	LSISWSR	AT1G61820.1	384
	LSKDEIEK	AT5G02500.1;AT3G09440.2;AT3G09440.1	385
	LSKEDIEK	AT5G02490.1	386
	LSLFDNR	AT2G27650.1	387
	LSQEEIDR	AT5G42020.1;AT5G28540.1	388
	LSQQGAITK	AT2G18960.1;AT4G30190.1;AT4G30190.2;AT1G80660.2;AT2G07560.1;AT1G80660.1;AT5G62670.1;AT3G47950.1;AT1G17260.1;AT3G42640.1;AT5G57350.2;AT5G57350.1	389
	LSSPATLNSR	P00761	390
	LTAEGGETGAVWDDGSHDDVKK	AT3G16460.2;AT3G16460.1	391
	LTEHYRR	AT5G54810.1;AT4G27070.1	392
	LTGMSFR	AT1G13440.2;AT1G13440.1;AT3G04120.1	393
	LTNSLMMHGR	AT3G11940.2;AT3G11940.1;AT2G37270.2;AT2G37270.1	394
	LTPDYDALDVANK	AT3G55280.3;AT3G55280.2;AT3G55280.1;AT2G39460.2;AT2G39460.1	395
	LTYQTTK	AT1G69620.1	396
	LVGVSEETTTGVK	AT4G13940.4;AT4G13940.3;AT4G13940.1;AT4G13940.2;AT3G23810.1	397
	LVIVGDGGTGK	AT5G55190.1;AT5G20020.1;AT5G20010.1	398
	LVLYVNGNK	AT5G26280.1	399
	LVNELTEFAK	P02769	400
	MEGKEEDVR	AT4G00430.2;AT2G45960.2;AT3G61430.2;AT3G61430.1;AT2G45960.1;AT1G01620.1;AT4G00430.1;AT2G45960.3	401
	MENGVIAGK	AT1G66150.1	402
	MESFNTLLK	AT3G20370.1	403
	MEVSQHSK	AT3G60245.1	404
	MFFDAELSQMQTHVSDTSVVLSMDNNR	P13647	405
	MFSAQHK	AT1G48830.2;AT1G48830.1	406
	MITGDQLAIGK	AT2G18960.1;AT4G30190.1;AT4G30190.2;AT1G80660.2;AT2G07560.1;AT1G80660.1;AT5G62670.1;AT3G47950.1;AT2G24520.1	407
	MSAVGFPR		408
	MSIAWPR	AT3G09260.1	409
	MSLLAEAQR	AT3G09630.1;AT3G09630.2	410
	MSLLAEASR	AT5G02870.1;AT5G02870.2	411
	MTLDDFR	P35527	412
	MVIPDALK	AT5G48760.2;AT5G48760.1;AT4G13170.1;AT3G24830.1	413
	MYDIQTK	AT3G55280.3;AT3G55280.2;AT3G55280.1;AT2G39460.2;AT2G39460.1	414
	NALENYAYNMR	AT5G02490.1;AT3G12580.1;AT5G02500.1;AT3G09440.2;AT3G09440.1;AT5G02500.2	415
	NAQNYAIGSK	AT3G09260.1	416
	NDGGAMIPIR	AT2G36880.2;AT2G36880.1	417
	NDGGNDHISLYAR	AT5G26280.1	418
	NDISALYSSGASK	AT1G54000.1	419
	NGQPEQAPLR	AT3G16420.3;AT3G16420.2;AT3G16420.1	420
	NGQPEQAPLRGTK	AT3G16420.3;AT3G16420.2;AT3G16420.1	421
	NGQTEQTPLR	AT3G16430.2;AT3G16430.1	422
	NGSQVVFGDER	AT3G16460.2;AT3G16460.1	423
	NHEEEMKDLR	P13645	424
	NHEEEMNALR	Q04695;Q9QWL7;P02533	425
	NHYVEGGDAGNR	AT2G44120.1;AT2G44120.2;AT2G01250.1;AT3G13580.3;AT3G13580.2;AT3G13580.1	426
	NIVEQAAIR	AT3G56340.1;AT2G40590.1;AT2G40510.1	427
	NIYVGQGENGVSAVK	AT1G33790.2;AT1G33790.1	428
	NKPGVYTK	P00761;P00760;P07477	429
	NKYEDEINK	P04264;H-INV:HIT000016045;P02538;P05787;Q8VED5;H-INV:HIT000292931;P13647;P48668;P04259	430
	NKYEDEINKR	P04264;H-INV:HIT000016045;P02538;P05787;Q8VED5;P13647;P48668;P04259	431
	NLNAMNQLK	AT3G52930.1;AT2G36460.1;AT2G36460.2	432
	NLNTDAFR	AT1G66280.1;AT3G09260.1;AT1G66270.2;AT1G66270.1	433
	NMQDMVEDYR	P04264	434
	NNQLVLGEEHGK	AT2G25980.1	435
	NNTQVLINCR	AT3G62840.2;AT2G47640.3;AT2G47640.2;AT3G62840.1;AT2G47640.4;AT2G47640.1	436
	NPEDIPWGEAGADFVVESTGVFTDKDK	AT1G13440.2;AT1G13440.1	437
	NPSTISTTVQK	AT3G15950.2;AT3G15950.1	438
	NQAAVNPER	AT5G42020.1;AT5G28540.1;AT5G42020.2	439
	NSIGIRPGK	AT3G09630.1;AT3G09630.2;AT5G02870.1;AT5G02870.2	440
	NSKIEISELNR	P04264	441
	NTDGSTDYGILQINSR	P00698	442
	NTKQEIAEINR	P02538;P48668;P04259	443
	NVQALEIELQSQLALK	P13645	444
	NVQDAIADAEQR	P35908	445
	NVSADVAATTR	AT3G55440.1	446
	PAGGAPAAPR	AT3G56340.1	447
	PGPVGSGSDFGR	AT3G29075.1	448
	PISGFGVSK	AT5G16960.1	449
	PLTAALNVYSR	AT3G09260.1	450
	PNFSSNHDSSAYDDQALK	AT3G29075.1	451
	PSAARESK	AT1G13730.1	452
	PSALKKDEL	AT1G66280.1;AT3G09260.1	453
	QAIPFTR	AT1G67430.1;AT1G27400.1;AT1G67430.2	454
	QDGDMLGENR	AT2G25980.1	455
	QDSLVSWEPK	AT1G66270.2;AT1G66270.1	456
	QEIAEINR	P02538;P48668;P04259	457
	QEYEQLIAK	P35527	458
	QEYNTGMDQCYEK	AT1G54000.1	459
	QFSSSYLSR	P35527	460
	QGGKDILVK	AT3G15730.1;AT1G52570.1	461
	QGVDADINGLR	P35527	462
	QIGAYDDAEK	AT3G09630.1;AT3G09630.2;AT5G02870.1;AT5G02870.2	463
	QISNLQQSISDAEQR	P04264	464
	QLDSIVGER	P02538;P13647;P48668;P04259	465
	QLDTLGNDKGR	P19013	466
	QNGVLNSWTDQDSK	P01837	467
	QRPAEIK	P02533	468
	QSLEASLAETEGR	P13645;P02535	469
	QSLLTQTSR	AT1G43170.4;AT1G43170.9;AT1G43170.8;AT1G43170.7;AT1G43170.6;AT1G43170.5;AT1G43170.3;AT1G43170.2;AT1G43170.1	470
	QSSSYGPHGYGSGR	Q86YZ3	471
	QSSSYGQHESASR	Q86YZ3	472
	QSSVPDGFEELAKKVVHLCGNLPLGLSIVGSSLR	AT5G41550.1	473
	QSVEADINGLR	P13645;P02535;Q2M2I5;P13646;O77727	474
	QSVEADINGLRR	P13645;P02535;P13646;O77727	475
	QTVEADVNGLR	P08779	476
	QVLDNLTMEK	P35527	477
	RAEKPEVR	AT3G53020.1;AT2G36620.1	478
	RMENGVIAGK	AT1G66150.1	479
	RMIRAHAQVIR	AT3G21180.1	480
	RWIYDTSK	P04944;P04943;P04942;P04941;P04940	481
	SAMPEGYVQER	P42212;PSB_N_GFP;PSB_C_GFP;Q9U6Y5;PSB_N_GS_yellow;PSB_N_GS_green;PSB_C_GS_green;PSB_C_GS_yellow	482
	SAVQGPPER	P01876;P01877	483
	SCALINQK	AT4G10450.1;AT1G33140.1;AT1G33120.1	484
	SCNALLLK	AT2G36530.1	485
	SCQISCK	P35908	486
	SEGYGGLYK	AT5G14040.1	487
	SEIAELNR	P19013	488
	SEIDNVK	P04264	489
	SEIDNVKK	P04264	490
	SEISELR	Q04695;Q9QWL7;P02533	491
	SEISELRR	Q04695;Q9QWL7;P02533	492
	SEITDLRR	O77727	493
	SEITELR	P13645;P02535	494
	SEITELRR	P13645;P02535	495
	SELDVNK	AT1G61430.1;AT1G61400.1	496
	SEVTELR	P08779	497
	SFGAAVIYNK	AT3G53420.2;AT3G53420.1;AT2G37170.1	498
	SFGAAVIYNNEK	AT5G60660.1;AT2G16850.1;AT4G35100.2;AT4G35100.1	499
	SFLQVQDK	AT3G16430.2;AT3G16430.1	500
	SFLQVQDKK	AT3G16430.2;AT3G16430.1	501
	SFNRNEC	P01837	502
	SGDELTSLK	AT5G56030.1;AT5G56010.1;AT5G56000.1;AT5G56030.2	503
	SGFQISAPEATGK	AT3G16460.2;AT3G16460.1	504
	SGFSSISVSR	P48668;P04259	505
	SGFSSVSVSR	P02538	506
	SGGGGGGGFGR	P13647	507
	SGGGGGGGGCGGGGGVSSLR	P13645	508
	SGGGGGGGLGSGGSIR	P35527	509
	SGNIADRIEQNK	AT5G05210.2;AT5G05210.1	510
	SHEDDDETHKAAER	AT5G16780.1	511
	SHLGNEWK	AT5G02960.1	512
	SHTLCVR	AT1G52300.1	513
	SISMSVAGSR	P19013	514
	SITVNEAQSR	AT2G21660.2;AT2G21660.1	515
	SKAEAEALYQTK	P19013	516
	SKAEAESLYQSK	P04264	517
	SKATLTVDK	P06328;P01754;P06329;P01751	518
	SKDTEAAVDAEDESAAEK	AT3G57150.1	519
	SKEEAEALYHSK	P35908	520
	SKFDNLYGCR	AT4G13940.4;AT4G13940.3;AT4G13940.1;AT4G13940.2;AT3G23810.1	521
	SLDFGER	AT4G36130.1;AT2G18020.1	522
	SLEDTKNR	P35527	523
	SLEGLQTNVQR	AT3G49010.4;AT3G49010.3;AT3G49010.2;AT3G49010.1	524
	SLLEGEGSSGGGGR	P13645	525
	SLLEGQDAK	P13646	526
	SLNNQFASFIDK	P04264	527
	SLSHSPGK	P01868	528
	SLVGLGGTK	P35908	529
	SLYNLGGSK	P13647	530
	SNPQEVTKPSPK	AT1G31440.1	531
	SNSNFNAVILK	AT5G27850.1	532
	SNVVVNTNGNPDIGK	AT1G66150.1	533
	SNVVVNTNGNPDIGKDK	AT1G66150.1	534
	SPEEVTGEEHGK	AT3G16420.3;AT3G16420.2;AT3G16420.1;AT3G16430.2;AT3G16430.1	535
	SPEQVSAAVK	AT3G08530.1;AT3G11130.1	536
	SQYEQLAEQNR	P13645	537
	SQYEQLAEQNRK	P13645	538
	SRDEDTEKEISR	AT5G16780.1	539
	SSEVMGYDDTGTK	AT2G25980.1	540
	SSIFDAK	AT1G13440.2;AT1G13440.1;AT3G04120.1	541
	SSTTPVPSTPLK	AT3G16460.2;AT3G16460.1	542
	STMQELNSR	P35527	543
	STSSFSCLSR	P35908	544
	STSSPSEEIVK	AT3G03640.1	545
	STSSPSEEIVKR	AT3G03640.1	546
	STTTGHLIYK	AT5G60390.2;AT5G60390.3;AT5G60390.1;AT1G07940.2;AT1G07940.1;AT1G07930.1;AT1G07920.1;AT1G07930.2	547
	STVPDKSQPRSR	AT5G57320.1	548
	SVSQDYGVR	AT1G04980.1	549
	SVVAAGLAR	AT2G36880.2;AT2G36880.1	550
	SVVANGMAR	AT4G01850.2;AT4G01850.1;AT1G02500.2;AT1G02500.1	551
	SWDDGSHAK	AT3G16460.2;AT3G16460.1	552
	SYDYGGDYDGIR	AT5G35940.1	553
	SYDYGGDYDGIRK	AT5G35940.1	554
	TAAAPIER	AT3G08580.2;AT3G08580.1;AT4G28390.1;AT5G13490.2;AT5G13490.1	555
	TAAENDFVTLK	P35908	556
	TAAENDFVTLKK	P35908	557
	TAAENEFVTLK	P02538;P48668;P04259	558
	TAAYGHFGR	AT4G01850.2;AT4G01850.1;AT1G02500.2;AT1G02500.1;AT3G17390.1;AT2G36880.2;AT2G36880.1	559
	TAEEVAALVR	AT4G38780.1;AT1G80070.1	560
	TAGPFGIVSGTK	AT3G16460.2;AT3G16460.1	561
	TAHDWMIK	AT1G79200.1	562
	TAVAVTHCK	AT5G18380.3;AT5G18380.2;AT5G18380.1;AT2G09990.1	563
	TCVADESAENCDK	P02768	564
	TDDLRRPLDR	AT5G49830.1;AT5G49830.3;AT5G49830.2	565
	TDVLERTR	AT2G40690.1	566
	TEAESWYQTK	P13647	567
	TEEREQIK	P13647;P19013	568
	TEITELR	P13646	569
	TEITELRR	P13646	570
	TEVEYGR	AT3G29075.1;AT5G39570.1	571
	TEYSSYAR	AT3G29075.1	572
	TFTCTAAYPESK	P01876	573
	TFVFESK	AT2G25980.1	574
	TGSIVDVPAGK	ATMG01190.1;AT2G07698.1	575
	TIAMDGTEGLVR	AT5G08690.1;AT5G08670.1;AT5G08680.1	576
	TIEAEAAHGTVTR	AT1G65930.1;AT1G54340.1	577
	TIEELQNK	Q04695	578
	TIFFKDDGNYK	P42212;PSB_N_GFP;PSB_C_GFP;Q9U6Y5;PSB_N_GS_yellow;PSB_N_GS_green;PSB_C_GS_green;PSB_C_GS_yellow	579
	TKEVEGEEAEEK	AT3G57150.1	580
	TKFETEQALR	Q04695;Q9QWL7;P08727	581
	TKGTGSFGK	AT1G52300.1	582
	TKYEHELALR	P08779	583
	TLADQFEAK	AT3G16780.1	584
	TLADYNIQK	AT3G62250.1;AT2G47110.2;AT2G47110.1;AT1G23410.1;AT3G52590.1;AT2G36170.1;AT4G05050.4;AT2G35635.1;AT1G31340.1;AT4G05050.3;AT4G05050.2;AT4G05050.1;AT4G02890.2;AT4G02890.1;AT1G55060.1;AT4G05320.5;AT4G02890.4;AT4G02890.3;AT5G03240.3;AT5G03240.2;AT5G03240.1;AT1G65350.1;AT5G37640.1;AT4G05320.6;AT4G05320.3;AT4G05320.1;AT5G20620.1;AT4G05320.4;AT4G05320.2;AT3G09790.1	585
	TLDVSSNK	AT1G66150.1	586
	TLLDIDNTR	P35527	587
	TLLEGEESR	P04264	588
	TLSDQFEAK	AT4G02230.1;AT1G02780.1	589
	TLSDYNIQK	P62979	590
	TLVIGTVTGTK	AT5G35940.1	591
	TMIYSAPLEDAR	AT1G31440.1	592
	TMQDSVEDFK	P19013	593
	TNAENEFVTIK	P04264	594
	TNAENEFVTIKK	P04264	595
	TPGPGAQSALR	AT3G52580.1;AT3G11510.1;AT2G36160.1	596
	TPLTATLSK	P01876	597
	TQDGGTEVVEAK	AT3G15020.2;AT3G15020.1;AT1G53240.1	598
	TQNVLGEK	AT5G35530.1;AT2G31610.1;AT3G53870.1	599
	TSDMIGYDENGLK	AT1G33790.2;AT1G33790.1	600
	TSDMMGFNK	AT5G35940.1	601
	TSFTSVSR	P13647	602
	TSLAPGSGVVTK	AT4G35830.2;AT4G35830.1;AT2G05710.1	603
	TSPPYGLETQK	AT3G16450.3;AT3G16450.2;AT3G16450.1	604
	TSPPYGLETQKK	AT3G16450.3;AT3G16450.2;AT3G16450.1	605
	TSTSPIVK	P01837	606
	TSVDVLKK	AT3G15730.1	607
	TSYGPYGTK	AT3G16460.2;AT3G16460.1	608
	TTAENEFVMLK	P13647	609
	TTAENEFVMLKK	P13647	610
	TTLVANTSNMPVAAR	AT1G78900.2;AT1G78900.1	611
	TTPSYVAFTDSER	AT5G02490.1;AT3G12580.1;AT1G56410.1;AT5G02500.1;AT3G09440.2;AT3G09440.1;AT5G02500.2	612
	TTSQDVDESICK	AT4G00100.1	613
	TTVVVAHR	AT1G10680.1;AT4G01820.1;AT4G18050.1;AT5G46540.1;AT3G28860.1;AT4G25960.1;AT1G02530.1;AT2G47000.1;AT3G62150.1	614
	TVEDGPDDVER	AT3G52220.1	615
	TVFNDEEQR	AT5G53800.1	616
	TVMENFVAFVDK	P02769	617
	TVQRKSPK	AT2G25120.1	618
	TVTKEEALAIK	AT3G09630.1	619
	TVVEEEEAK	AT1G02930.2;AT1G02930.1;AT1G02920.1	620
	TWFNQPAR	AT3G49010.4;AT3G49010.3;AT3G49010.2;AT3G49010.1;AT3G49010.5;AT5G23900.1	621
	TYETTLEK	P02768	622
	TYFNDLTTEAAR	AT1G79200.1	623
	TYSDLAGPEYTAK	AT5G14040.1	624
	TYVNTYR	AT4G31700.2	625
	VADFGLVR	AT1G66150.1;AT1G24650.1	626
	VALVNYGEDHGK	AT4G27090.1	627
	VATVSLPR	P00761	628
	VAVICGYGDVGK	AT4G13940.4;AT4G13940.3;AT4G13940.1;AT4G13940.2;AT3G23810.1	629
	VCGNSHGLIR	AT4G33865.1;AT3G44010.1;AT3G43980.1	630
	VCTDLVR	AT5G62300.2;AT5G62300.1;AT3G45030.1;AT3G47370.3;AT3G47370.2;AT3G47370.1	631
	VDPEIQNVK	P35908	632
	VDYDKDGK	AT2G25980.1	633
	VDYDKDGKVETR	AT2G25980.1	634
	VEAGGGAGGASWDDGVHDGVR	AT3G16450.3;AT3G16450.2;AT3G16450.1	635
	VEHVQQSR	AT1G09690.1;AT1G09590.1;AT1G57860.1;AT1G57660.1	636
	VEIIANDQGNR	AT5G02490.1;AT3G12580.1;AT1G56410.1;AT5G02500.1;AT3G09440.2;AT3G09440.1;AT5G02500.2	637
	VGDYVDVK	AT1G09690.1;AT1G09590.1;AT1G57860.1;AT1G57660.1	638
	VGEFSGANK	P10599	639
	VGSSEAALLAK	AT2G40010.1;AT3G09200.1;AT3G11250.1;AT3G09200.2	640
	VHEIPAMK	AT5G27850.1;AT3G05590.1	641
	VIAANKDR	AT3G05560.3;AT3G05560.2;AT3G05560.1;AT5G27770.1	642
	VIDLFSSPDVVK	AT5G62300.2;AT5G62300.1;AT3G45030.1;AT3G47370.3;AT3G47370.2;AT3G47370.1	643
	VIDQIQSNNFEK	AT1G58270.1	644
	VIEVEGPR	AT4G10450.1;AT1G33140.1;AT1G33120.1	645
	VITVNEAQSR	AT4G39260.3;AT4G39260.2;AT4G39260.1	646
	VLAHTQIR	AT1G43170.4;AT1G43170.9;AT1G43170.8;AT1G43170.7;AT1G43170.6;AT1G43170.5;AT1G43170.3;AT1G43170.2;AT1G43170.1;AT1G61580.1	647
	VLAPYSAEDAR	AT5G50850.1	648
	VLDELTLAR	Q04695;Q9QWL7;P08727;P19001;P02533;P08779	649
	VLDELTLTK	P13645;O77727	650
	VLDVYEAR	AT4G02520.1;AT2G02930.1;AT2G47730.1	651
	VLDVYEHR	AT1G02930.2;AT1G02930.1;AT1G02920.1	652
	VLELESTNVK	AT3G25230.1;AT3G25230.2	653
	VLMESIHK	AT4G02230.1;AT1G02780.1;AT3G16780.1	654
	VLNTNVDGK	AT4G09800.1;AT1G34030.1;AT1G22780.1	655
	VLPYSAVQLLAYESYKNLFKGK	AT3G51870.1	656
	VLYDAEISQIHQSVTDTNVILSMDNSR	P35908	657
	VNELKEEIR	AT2G31410.1	658
	VNQAYVIGTSTK	AT1G74060.1;AT1G74050.1;AT1G18540.1	659
	VNSAAFPAPIEK	P01868;P01869	660
	VPQVSTPTLVEVSR	P02768;P02769	661
	VPVLTPSR	AT1G47290.1;AT1G47290.2	662
	VQALEEANNDLENK	P35527	663
	VQTSSGEKPVR	AT1G04410.1	664
	VSLAGACGVGGYGSR	P13647	665
	VTDALNATK	AT3G23990.1;AT2G33210.2;AT2G33210.1	666
	VTMQNLNDR	P13645;P02535;Q148H6;Q7Z3Y7;Q7Z3Z0;Q7Z3Y8;Q7Z3Y9;P02533;P08779;Q3ZAW8;Q9Z2K1	667
	VTTTIGYGSPNK	AT3G60750.2;AT3G60750.1;AT2G45290.1	668
	VVDLIVHMSK	AT1G13440.2;AT1G13440.1;AT3G04120.1	669
	VVEVSTSK	AT1G26630.1;AT1G26630.2;AT1G69410.1;AT1G13950.1	670
	VVLIGDSGVGK	AT4G18800.1;AT5G45750.1;AT1G16920.1;AT5G60860.1;AT3G15060.1;AT1G09630.1	671
	VVTKEEAQAIK	AT5G02870.1	672
	VYIGQAQDGISAVK	AT3G16440.1	673
	VYRSEGLAGFHR	AT2G17270.1	674
	VYVGQAQDGISAVK	AT3G16420.3;AT3G16420.2;AT3G16420.1;AT3G16430.2;AT3G16430.1	675
	VYVGQGDSGVVYVK	AT3G16470.2;AT3G16470.1;AT3G16470.3	676
	VYVGQGQDGISAVK	AT3G16450.3;AT3G16450.2;AT3G16450.1	677
	VYVGQGQDGVAAVK	AT3G16460.2;AT3G16460.1	678
	VYVTYDGTSIR	AT5G35940.1	679
	WEEVFFYENVHNEDCVEVVVDVDLELQVINIEGQK	AT1G13550.1	680
	WKIDGSER	P01837	681
	WQAYEGR	AT1G66150.1	682
	WTLLQEQGTK	P02538;P13647;P48668;P04259	683
	WVRVDFKEPVWFK	AT5G54270.1	684
	YAAGVVTQNENEAEVSGSSSPSGGEFLSPSAENGASR	AT2G30690.1	685
	YEDEINK	P35908;Q01546;Q7Z794;P04264;H-INV:HIT000016045;P02538;P05787;Q8VED5;H-INV:HIT000292931;P13647;P48668;P04259	686
	YEDEINKR	P35908;Q01546;Q7Z794;P04264;H-INV:HIT000016045;P02538;P05787;Q8VED5;P13647;P48668;P04259	687
	YEEEINKR	P19013	688
	YEELQITAGR	P04264	689
	YEELQQTAGR	P13647	690
	YEGVILNK	AT5G45775.1;AT5G45775.2;AT4G18730.1;AT3G58700.1;AT2G42740.1	691
	YENELALR	P13646	692
	YENEVALR	P13645	693
	YFCEFCGK	AT3G60245.1;AT3G10950.1	694
	YGDENPDANTPLSR	AT1G31440.1	695
	YGLNCCR	AT4G33865.1;AT3G44010.1;AT3G43980.1	696
	YGQQGSGSGQSPSR	Q86YZ3	697
	YICENQDSISSK	P02768	698
	YKEDIQLMK	AT1G66280.1;AT3G21370.1;AT3G09260.1;AT5G28510.1;AT1G66270.2;AT1G66270.1;AT1G52400.2;AT1G52400.3;AT1G52400.1	699
	YLDGLTAER	P35908	700
	YLEDVIAHK	AT1G67430.1;AT1G27400.1;AT1G67430.2	701
	YLKGCEDRDGR	AT1G66280.1	702
	YLSVTDGTVK	AT5G26260.1	703
	YLSVTDGTVKR	AT5G26260.1	704
	YLTVTDGLVK	AT5G26280.1;AT5G26280.2	705
	YLYEIAR	P02768;P02769	706
	YPLTTESAMK	AT3G55280.3;AT3G55280.2;AT3G55280.1;AT2G39460.2;AT2G39460.1	707
	YRLDGTK	AT1G48830.2;AT1G48830.1;AT3G02560.2;AT3G02560.1	708
	YTEVKPALK	AT5G17920.2;AT5G17920.1;AT3G03780.3;AT3G03780.2;AT3G03780.1	709
	YTGDSDLQLER	AT5G62700.1;AT5G62690.1	710
	YVDAVMTIPK	AT3G02230.1;AT5G15650.1;AT3G08900.1;AT5G50750.1	711
	YVGSSFR	AT4G16990.5;AT4G16990.3;AT4G16990.4;AT4G16990.1;AT4G16990.2	712
	YVPGCEDR	AT1G66270.2;AT1G66270.1	713
	YVPGCEDREGQSGK	AT1G66270.2;AT1G66270.1	714
	YYCTVIDAPGHR	AT5G60390.2;AT5G60390.3;AT5G60390.1;AT1G07940.2;AT1G07940.1;AT1G07930.1;AT1G07920.1;AT1G07930.2	715
	YYEGISTAPR	AT1G79200.1	716

## Sheet: Coverage of identified proteins
	AT1G66150	TMK1
		Overview detected peptides	FSGSESSNAVVVHPR	SNVVVNTNGNPDIGK	VADFGLVR
			MENGVIAGK	SNVVVNTNGNPDIGKDK	WQAYEGR
			RMENGVIAGK	TLDVSSNK
		overview full protein with detected peptides	MKKRRTFLLFSFTFLLLLSLSKADSDGDLSAMLSLKKSLNPPSSFGWSDPDPCKWTHIVCTGTKRVTRIQIGHSGLQGTLSPDLRNLSELERLELQWNNISGPVPSLSGLASLQVLMLSNNNFDSIPSDVFQGLTSLQSVEIDNNPFKSWEIPESLRNASALQNFSANSANVSGSLPGFLGPDEFPGLSILHLAFNNLEGELPMSLAGSQVQSLWLNGQKLTGDITVLQNMTGLKEVWLHSNKFSGPLPDFSGLKELESLSLRDNSFTGPVPASLLSLESLKVVNLTNNHLQGPVPVFKSSVSVDLDKDSNSFCLSSPGECDPRVKSLLLIASSFDYPPRLAESWKGNDPCTNWIGIACSNGNITVISLEKMELTGTISPEFGAIKSLQRIILGINNLT…
		GFP
		Overview of detected peptides	EDGNILGHK	FICTTGK	SAMPEGYVQER
			FEGDTLVNR	GEELFTGVVPILVELDGDVNGHKFSVSGEGEGDATYGK	TIFFKDDGNYK
		overview full protein with detected peptides	MDEKTTGWRGGHVVEGLAGELEQLRARLEHHPQGQREPLEVLFQGPLEVLFQGPENLYFQGAIPGTTENLYFQGELKTAALGQHDEAMVSKGEELFTGVVPILVELDGDVNGHKFSVSGEGEGDATYGKLTLKFICTTGKLPVPWPTLVTTLTYGVQCFSRYPDHMKQHDFFKSAMPEGYVQERTIFFKDDGNYKTRAEVKFEGDTLVNRIELKGIDFKEDGNILGHKLEYNYNSHNVYIMADKQKNGIKVNFKIRHNIEDGSVQLADHYQQNTPIGDGPVLLPDNHYLSTQSALSKDPNEKRDHMVLLEFVTAAGITLGMDELYK
	AT2G18960-AT4G30190	AHA1 - AHA2
		Overview of detected peptides	EGLTTQEGEDR	GHVESVAK	MITGDQLAIGK
			ELSEIAEQAK	LSQQGAITK
		overview full protein with detected peptides	MSGLEDIKNETVDLEKIPIEEVFQQLKCTREGLTTQEGEDRIVIFGPNKLEEKKESKILKFLGFMWNPLSWVMEAAALMAIALANGDNRPPDWQDFVGIICLLVINSTISFIEENNAGNAAAALMAGLAPKTKVLRDGKWSEQEAAILVPGDIVSIKLGDIIPADARLLEGDPLKVDQSALTGESLPVTKHPGQEVFSGSTCKQGEIEAVVIATGVHTFFGKAAHLVDSTNQVGHFQKVLTSIGNFCICSIAIGIAIEIVVMYPIQHRKYRDGIDNLLVLLIGGIPIAMPTVLSVTMAIGSHRLSQQGAITKRMTAIEEMAGMDVLCSDKTGTLTLNKLSVDKNLVEVFCKGVEKDQVLLFAAMASRVENQDAIDAAMVGMLADPKEARAGIREVHFLP…
			MSSLEDIKNETVDLEKIPIEEVFQQLKCSREGLTTQEGEDRIQIFGPNKLEEKKESKLLKFLGFMWNPLSWVMEMAAIMAIALANGDGRPPDWQDFVGIICLLVINSTISFIEENNAGNAAAALMAGLAPKTKVLRDGKWSEQEAAILVPGDIVSIKLGDIIPADARLLEGDPLKVDQSALTGESLPVTKHPGQEVFSGSTCKQGEIEAVVIATGVHTFFGKAAHLVDSTNQVGHFQKVLTAIGNFCICSIAIGMVIEIIVMYPIQRRKYRDGIDNLLVLLIGGIPIAMPTVLSVTMAIGSHRLSQQGAITKRMTAIEEMAGMDVLCSDKTGTLTLNKLSVDKNLVEVFCKGVEKDQVLLFAAMASRVENQDAIDAAMVGMLADPKEARAGIREVHFLP…
